# Supplementary material for: Deletion of LBR N-terminal domains recapitulates Pelger-Huet anomaly phenotypes in mouse without disrupting X chromosome inactivation
Source: PubMed Central journal article supplement (PMC8041748; doi:10.1038/s42003-021-01944-2), 2021-04-12
Supplement: 42003_2021_1944_MOESM3_ESM.pdf [file 42003_2021_1944_MOESM3_ESM.pdf]

## **Description of Additional Supplementary Files**

**File name:** Supplementary Data 1

**Description:** Processed RNA-seq results for KO vs WT mice. Results are shown separately for male and female mice.

**File name:** Supplementary Data 2

**Description:** Source data for the main and supplementary figures.

**File name:** Supplementary Data 3

**Description:** Primers used in this study.
