# Supplementary material for: Deletion of LBR N-terminal domains recapitulates Pelger-Huet anomaly phenotypes in mouse without disrupting X chromosome inactivation
Source: Commun Biol. 2021 Apr 12;4:478. doi: 10.1038/s42003-021-01944-2 (PMC8041748; doi:10.1038/s42003-021-01944-2)
Supplement: Supplementary file 4 — Supplementary Data 1 [file 42003_2021_1944_MOESM4_ESM.xlsx]

## Sheet: fKO vs fWT
	matchname	logFC	logCPM	LR	PValue	FDR
ENSMUSG00000035448	Ccr3	3.86465	1.05194	89.7363	2.72e-21	3.48e-17
ENSMUSG00000047228	A2ml1	-2.34935	2.90167	35.5487	2.49e-09	1.59e-05
ENSMUSG00000030364	Clec2h	-3.45532	0.640544	28.7293	8.32e-08	0.000354889
ENSMUSG00000107838	Gm45769	-1.61289	2.47921	27.4298	1.63e-07	0.000520921
ENSMUSG00000030131	Mug2	-1.96491	6.74022	25.8351	3.72e-07	0.000951303
ENSMUSG00000078683	Mup1	3.21619	6.94578	24.1247	9.03e-07	0.00192493
ENSMUSG00000094222	Mup-ps6	2.42423	0.633431	20.1113	7.31e-06	0.0133506
ENSMUSG00000103898	Gm30238	-1.76971	0.475611	19.7752	8.71e-06	0.0139268
ENSMUSG00000090298	Sult3a2	3.65104	4.5519	18.7864	1.46e-05	0.0207794
ENSMUSG00000107516	Gm30784	-5.52062	-0.0408677	18.0961	2.1e-05	0.0268644
ENSMUSG00000069049	Eif2s3y	5.58992	4.83491	17.0805	3.58e-05	0.0416613
ENSMUSG00000074634	Tmem267	2.50829	0.0318153	16.8048	4.14e-05	0.0429049
ENSMUSG00000004880	Lbr	0.913626	3.40478	16.7076	4.36e-05	0.0429049
ENSMUSG00000043122	A530016L24Rik	3.84469	-0.66308	16.1649	5.81e-05	0.0530466
ENSMUSG00000026535	Ifi202b	8.16121	-1.00257	13.7915	0.000204255	0.174175
ENSMUSG00000097316	Gm10516	-1.25287	0.246851	13.3382	0.000260049	0.207893
ENSMUSG00000070645	Ren1	4.82	3.07636	12.6147	0.000382729	0.28797
ENSMUSG00000037443	Cep85	-1.30323	5.2447	12.1405	0.000493396	0.350613
ENSMUSG00000037035	Inhbb	-1.37827	-0.0937624	11.8776	0.000568127	0.360205
ENSMUSG00000078552	Dcdc2b	-1.4389	0.542016	11.8174	0.000586806	0.360205
ENSMUSG00000041538	H2-Ob	-1.31753	0.111274	11.7351	0.000613309	0.360205
ENSMUSG00000037157	Il22ra1	1.3143	-0.117511	11.65	0.000642015	0.360205
ENSMUSG00000030724	Cd19	-1.15196	0.209164	11.6336	0.000647699	0.360205
ENSMUSG00000039246	Lyplal1	0.684879	4.77263	11.4161	0.000728091	0.388042
ENSMUSG00000063696	Gm8730	2.11889	3.95257	11.1951	0.000820157	0.419625
ENSMUSG00000068220	Lgals1	-1.23918	2.99059	10.7318	0.00105311	0.51809
ENSMUSG00000026380	Tfcp2l1	0.914495	2.51139	10.4289	0.00124057	0.571098
ENSMUSG00000095562	Gm21887	3.70161	3.08395	10.4147	0.00125016	0.571098
ENSMUSG00000082100	Glns-ps1	0.893272	3.28746	10.0703	0.00150677	0.654667
ENSMUSG00000094793	Mup12	1.36041	6.84585	10.0356	0.00153546	0.654667
ENSMUSG00000082363	Mup-ps18	1.94356	1.04113	9.8406	0.00170702	0.67838
ENSMUSG00000084349	Rpl3-ps1	0.760679	5.74789	9.79861	0.00174644	0.67838
ENSMUSG00000071204	Gm10319	-1.13154	4.2565	9.79468	0.00175018	0.67838
ENSMUSG00000073830	Mup14	1.60052	10.3546	9.69481	0.00184789	0.695186
ENSMUSG00000096215	Smim22	-1.4905	1.77291	9.52455	0.00202741	0.740932
ENSMUSG00000091867	Cyp2a22	0.989804	6.07726	9.26304	0.00233825	0.830792
ENSMUSG00000047746	Fbxo40	1.31742	0.0782732	9.16526	0.00246652	0.852683
ENSMUSG00000042638	Gucy2c	0.996859	0.4073	9.0716	0.0025961	0.873859
ENSMUSG00000015093	Clic3	1.78699	1.55094	8.81851	0.0029819	0.977985
ENSMUSG00000038173	Enpp6	-2.2219	0.428711	8.69956	0.00318287	1
ENSMUSG00000041550	Serpina5	2.80899	-0.546784	8.60187	0.00335818	1
ENSMUSG00000045314	Sowahb	0.992474	1.93331	8.54033	0.00347363	1
ENSMUSG00000091460	Gm7808	-1.21894	0.294859	8.49708	0.00355718	1
ENSMUSG00000079343	C1s2	0.906485	5.08828	8.40307	0.00374587	1
ENSMUSG00000061013	Mkx	1.27143	1.5692	8.39148	0.00376983	1
ENSMUSG00000098470	C1rb	0.72695	5.45845	8.35979	0.00383614	1
ENSMUSG00000070605	Zfp992	-2.46659	0.417324	8.20431	0.00417911	1
ENSMUSG00000073834	Mup11	-2.20239	10.4293	7.98	0.0047297	1
ENSMUSG00000095134	Mid1-ps1	2.29445	1.11188	7.81405	0.00518417	1
ENSMUSG00000039878	Slc39a5	-0.930703	0.164326	7.78462	0.00526929	1
ENSMUSG00000074521	Gm14327	0.952641	2.22075	7.68258	0.00557564	1
ENSMUSG00000096768	Gm47283	3.18426	4.09908	7.54839	0.00600638	1
ENSMUSG00000028393	Alad	0.980633	7.6823	7.53989	0.00603477	1
ENSMUSG00000073840	Mup-ps2	2.88808	2.13765	7.50973	0.00613666	1
ENSMUSG00000016239	Lonrf3	0.842243	1.37991	7.47562	0.00625401	1
ENSMUSG00000078597	Cyp4a12b	1.41233	5.6075	7.28719	0.00694482	1
ENSMUSG00000081053	Mup-ps17	1.62731	3.38274	7.25424	0.00707337	1
ENSMUSG00000038422	Hdhd3	1.22746	4.93878	7.24851	0.00709598	1
ENSMUSG00000003379	Cd79a	-0.989675	0.104048	7.24442	0.00711216	1
ENSMUSG00000078688	Mup2	2.19194	8.9463	7.20257	0.00727993	1
ENSMUSG00000100277	1810053B23Rik	-1.80768	-0.574686	7.17332	0.00739958	1
ENSMUSG00000104213	Ighd	-1.03094	0.351431	7.13776	0.00754773	1
ENSMUSG00000024131	Slc3a1	0.916616	4.64318	7.05259	0.00791508	1
ENSMUSG00000020776	Fbf1	-0.707446	3.38499	7.02276	0.008048	1
ENSMUSG00000062825	Actg1	0.70124	6.03687	7.008	0.00811463	1
ENSMUSG00000027843	Ptpn22	-0.950168	-0.447872	6.99141	0.00819017	1
ENSMUSG00000081824	Ndufs5-ps	0.742115	4.3807	6.95437	0.00836147	1
ENSMUSG00000035299	Mid1	1.92895	3.7427	6.93494	0.00845281	1
ENSMUSG00000001588	Acap1	-0.764763	1.86695	6.84324	0.00889775	1
ENSMUSG00000028637	Ccdc30	-1.19278	1.02697	6.80866	0.00907169	1
ENSMUSG00000031803	B3gnt3	-0.796018	0.962603	6.76887	0.00927617	1
ENSMUSG00000081207	Gm13775	-1.324	5.91102	6.69433	0.009672	1
ENSMUSG00000066361	Serpina3c	4.08334	4.90217	6.67861	0.00975767	1
ENSMUSG00000057897	Camk2b	-1.66432	3.11194	6.61757	0.0100978	1
ENSMUSG00000030798	Cd37	-0.767545	1.1572	6.61417	0.0101171	1
ENSMUSG00000091655	Gm8741	0.671333	2.37084	6.53218	0.010594	1
ENSMUSG00000006638	Abhd1	0.834817	1.49343	6.50849	0.0107361	1
ENSMUSG00000102525	Gm37784	1.21013	-0.0654342	6.50397	0.0107634	1
ENSMUSG00000021594	Srd5a1	0.730149	6.27598	6.49453	0.0108207	1
ENSMUSG00000027965	Olfm3	1.24076	1.79034	6.48663	0.0108689	1
ENSMUSG00000059195	Gm12715	0.895943	3.95096	6.4793	0.0109138	1
ENSMUSG00000039264	Gimap3	-0.769999	1.19657	6.43268	0.011204	1
ENSMUSG00000082908	Gm13736	1.13122	3.02824	6.39855	0.0114214	1
ENSMUSG00000040938	Slc16a11	-0.563092	3.4984	6.3944	0.0114481	1
ENSMUSG00000076498	Trbc2	-0.900165	0.201743	6.29278	0.0121231	1
ENSMUSG00000083332	Gm7599	-1.55693	-0.642492	6.29274	0.0121233	1
ENSMUSG00000030707	Coro1a	-0.697478	2.50657	6.26399	0.0123217	1
ENSMUSG00000063952	Brpf3	-0.562688	4.89802	6.25248	0.0124019	1
ENSMUSG00000040247	Tbc1d10c	-0.860624	-0.0375038	6.19138	0.0128374	1
ENSMUSG00000054676	1600014C10Rik	0.728005	7.58512	6.15243	0.0131232	1
ENSMUSG00000042684	Npl	0.787864	0.643021	6.1386	0.0132262	1
ENSMUSG00000045838	Ccdc9b	-0.703787	1.49827	6.13144	0.0132799	1
ENSMUSG00000041567	Serpina12	-0.78153	6.37277	6.11302	0.0134189	1
ENSMUSG00000071719	Tmem28	1.52379	0.24684	6.05724	0.0138494	1
ENSMUSG00000106053	Gm20752	4.32072	-0.217037	6.04188	0.0139704	1
ENSMUSG00000022091	Sorbs3	-0.731118	4.79953	6.02326	0.0141186	1
ENSMUSG00000032657	Fam189b	-0.792675	0.0530091	6.0132	0.0141993	1
ENSMUSG00000019966	Kitl	-1.07982	1.33531	5.98217	0.0144512	1
ENSMUSG00000097906	Gm9625	0.749973	1.71071	5.944	0.0147675	1
ENSMUSG00000033777	Tlr13	0.822911	0.416463	5.93253	0.0148639	1
ENSMUSG00000083087	Gm11249	1.21743	0.0622428	5.86317	0.015461	1
ENSMUSG00000058523	Mup5	2.90262	2.65214	5.83425	0.0157171	1
ENSMUSG00000026185	Igfbp5	1.33467	3.91502	5.80635	0.0159684	1
ENSMUSG00000023979	Guca1b	-0.923785	-0.13178	5.69224	0.0170401	1
ENSMUSG00000082895	Rpsa-ps9	-0.848993	0.323162	5.68279	0.0171321	1
ENSMUSG00000037679	Inf2	-0.441995	5.28559	5.64038	0.0175514	1
ENSMUSG00000002831	Plin4	-0.752316	2.73474	5.63185	0.017637	1
ENSMUSG00000026944	Abca2	0.517487	5.09048	5.62046	0.017752	1
ENSMUSG00000095532	Mup-ps13	0.854705	4.58574	5.60405	0.017919	1
ENSMUSG00000079442	St6galnac4	0.770638	1.54299	5.59358	0.0180265	1
ENSMUSG00000025083	Afap1l2	-0.974403	-0.0624909	5.58128	0.0181535	1
ENSMUSG00000110298	Gm8189	0.946109	1.68196	5.55729	0.0184039	1
ENSMUSG00000031972	Acta1	3.15034	-0.368643	5.54805	0.0185013	1
ENSMUSG00000090925	1810064F22Rik	1.0211	1.98674	5.53433	0.018647	1
ENSMUSG00000026628	Atf3	0.930011	0.792453	5.51655	0.0188374	1
ENSMUSG00000023078	Cxcl13	-1.04295	-0.0561726	5.51239	0.0188823	1
ENSMUSG00000078685	Mup-ps4	3.88766	3.11258	5.47884	0.019248	1
ENSMUSG00000028476	Reck	0.730778	2.10401	5.47638	0.0192751	1
ENSMUSG00000028860	Sytl1	-0.907097	2.03524	5.35706	0.0206386	1
ENSMUSG00000021180	Rps6ka5	-1.00458	0.0886934	5.33933	0.0208495	1
ENSMUSG00000020000	Moxd1	2.51692	5.75331	5.3105	0.0211973	1
ENSMUSG00000085211	B430219N15Rik	1.78048	0.731499	5.30885	0.0212174	1
ENSMUSG00000017969	Ptgis	-0.643461	1.31978	5.30251	0.0212947	1
ENSMUSG00000073102	Drc1	0.814086	-0.42195	5.28875	0.0214636	1
ENSMUSG00000024130	Abca3	1.01792	5.45195	5.27972	0.0215752	1
ENSMUSG00000016520	Lnx2	0.540628	3.38865	5.27934	0.0215799	1
ENSMUSG00000024211	Grm8	1.44254	0.513918	5.27017	0.0216939	1
ENSMUSG00000028555	Ttc39a	1.8702	0.933095	5.25412	0.0218949	1
ENSMUSG00000097148	Gm3839	0.711121	2.03604	5.22563	0.0222563	1
ENSMUSG00000078686	Mup9	3.40562	9.77687	5.19235	0.0226866	1
ENSMUSG00000018983	E2f2	0.906829	0.729474	5.1897	0.0227212	1
ENSMUSG00000046402	Rbp1	-0.945496	4.21339	5.18342	0.0228034	1
ENSMUSG00000033618	Map3k13	0.607584	2.93839	5.17338	0.0229356	1
ENSMUSG00000053291	Rab4b	0.829763	0.179023	5.13726	0.0234176	1
ENSMUSG00000030787	Lyve1	-0.639424	2.20455	5.07701	0.0242452	1
ENSMUSG00000089993	Gm5822	0.998789	0.799472	5.06556	0.0244059	1
ENSMUSG00000059659	Gm10069	0.890691	1.16364	5.06042	0.0244783	1
ENSMUSG00000029650	Slc46a3	0.535461	6.15709	5.05351	0.0245761	1
ENSMUSG00000026603	Smyd2	0.548082	3.54008	5.04109	0.0247529	1
ENSMUSG00000073421	H2-Ab1	-0.631008	4.52886	5.0405	0.0247613	1
ENSMUSG00000047822	Angptl8	1.31291	7.03637	5.01961	0.0250618	1
ENSMUSG00000032649	Colgalt2	1.0689	1.06126	5.00804	0.0252298	1
ENSMUSG00000032280	Tle3	0.503255	3.57832	4.96451	0.0258726	1
ENSMUSG00000087691	Cd55os	-0.74598	0.374692	4.95255	0.0260523	1
ENSMUSG00000026333	Gin1	-0.678241	3.44447	4.94964	0.0260962	1
ENSMUSG00000028195	Ccn1	0.68905	2.70958	4.93903	0.0262567	1
ENSMUSG00000034910	Pygo1	0.786153	-0.510281	4.92416	0.0264837	1
ENSMUSG00000000682	Cd52	-0.568539	2.1113	4.78754	0.0286663	1
ENSMUSG00000096349	Gm22513	1.36426	2.51432	4.78753	0.0286665	1
ENSMUSG00000052684	Jun	0.851568	3.1916	4.77023	0.028956	1
ENSMUSG00000034647	Ankrd12	-0.56596	3.27624	4.75488	0.0292153	1
ENSMUSG00000080242	Atp6v0c-ps2	0.961818	3.23051	4.72195	0.02978	1
ENSMUSG00000064326	Siva1	0.574012	2.48018	4.71689	0.0298677	1
ENSMUSG00000067586	S1pr3	-0.65584	1.05882	4.68461	0.030434	1
ENSMUSG00000019897	Ccdc59	-0.546519	3.71919	4.64643	0.0311183	1
ENSMUSG00000042225	Ammecr1	0.646772	0.525133	4.63804	0.0312707	1
ENSMUSG00000104394	Gm37254	-0.580185	2.18984	4.58935	0.0321712	1
ENSMUSG00000021285	Ppp1r13b	-0.486415	3.54392	4.57059	0.0325254	1
ENSMUSG00000050914	Ankrd37	0.889916	0.978217	4.53065	0.033293	1
ENSMUSG00000099568	Gm28513	-1.17567	-0.780054	4.52941	0.0333171	1
ENSMUSG00000032091	Tmprss4	1.4604	0.133715	4.52738	0.0333566	1
ENSMUSG00000079037	Prnp	0.449853	5.3855	4.52489	0.0334053	1
ENSMUSG00000056643	Chst13	0.592466	2.22395	4.51831	0.033534	1
ENSMUSG00000090090	Mup-ps16	-1.61685	3.99335	4.51359	0.0336265	1
ENSMUSG00000083773	Gm13394	1.12927	6.64064	4.50078	0.0338793	1
ENSMUSG00000022704	Qtrt2	-0.484275	3.32969	4.48974	0.0340988	1
ENSMUSG00000055725	Paqr3	0.955002	1.04177	4.47034	0.0344881	1
ENSMUSG00000091898	Tnnc1	0.725422	1.73594	4.46874	0.0345204	1
ENSMUSG00000029338	Antxr2	0.548558	4.7184	4.46272	0.0346423	1
ENSMUSG00000048538	Gm9826	0.699047	4.46112	4.4596	0.0347056	1
ENSMUSG00000001334	Fndc5	0.956774	1.0882	4.44352	0.0350338	1
ENSMUSG00000046876	Atxn1	0.749502	4.29875	4.44305	0.0350436	1
ENSMUSG00000045826	Ptprcap	-0.932124	-0.613987	4.43854	0.0351362	1
ENSMUSG00000036390	Gadd45a	0.717072	3.08784	4.38501	0.0362562	1
ENSMUSG00000048916	Gm5540	0.807479	0.828529	4.38382	0.0362816	1
ENSMUSG00000044948	Cfap43	-0.800708	-0.0446159	4.38081	0.0363458	1
ENSMUSG00000075391	Gm13443	0.723633	3.63002	4.37883	0.036388	1
ENSMUSG00000037461	Ints7	-0.433932	4.06519	4.37775	0.0364109	1
ENSMUSG00000067203	H2-K2	-0.731883	4.18867	4.37635	0.036441	1
ENSMUSG00000022442	Ttll1	0.668417	0.857827	4.36981	0.036581	1
ENSMUSG00000058152	Chsy3	0.765768	1.1904	4.36634	0.0366556	1
ENSMUSG00000036594	H2-Aa	-0.555756	5.15536	4.36448	0.0366956	1
ENSMUSG00000021215	Net1	0.437793	5.32578	4.36012	0.0367896	1
ENSMUSG00000047880	Cxcr5	-1.00509	-0.43287	4.35633	0.0368716	1
ENSMUSG00000106334	Gm43549	-2.74694	-1.26851	4.34323	0.0371564	1
ENSMUSG00000109674	Gm45470	-0.826971	1.93407	4.3419	0.0371854	1
ENSMUSG00000041698	Slco1a1	0.901751	9.33389	4.34177	0.0371883	1
ENSMUSG00000024871	Doc2g	-0.737269	1.30525	4.33354	0.0373684	1
ENSMUSG00000068086	Cyp2d9	-0.681973	9.73689	4.32773	0.0374963	1
ENSMUSG00000074171	Gm6658	-0.728842	-0.277982	4.32393	0.0375801	1
ENSMUSG00000107096	Gm43597	-0.627779	1.97791	4.31966	0.0376744	1
ENSMUSG00000023913	Pla2g7	-0.601644	1.56488	4.309	0.0379113	1
ENSMUSG00000030423	Pop4	-0.524953	3.54625	4.29594	0.0382035	1
ENSMUSG00000024430	Cabyr	-0.550612	2.91437	4.27648	0.0386432	1
ENSMUSG00000028838	Extl1	0.684145	3.84366	4.26565	0.0388905	1
ENSMUSG00000087222	E030042O20Rik	-0.740436	-0.230007	4.26044	0.0390098	1
ENSMUSG00000000320	Alox12	0.702339	-0.184441	4.2604	0.0390107	1
ENSMUSG00000108083	Mug4-ps	-0.655482	2.33761	4.25582	0.039116	1
ENSMUSG00000021217	Tshz3	-0.799087	0.201197	4.24631	0.0393356	1
ENSMUSG00000024696	Lpxn	-0.755633	1.00847	4.24054	0.0394695	1
ENSMUSG00000032083	Apoa1	-0.930247	12.6908	4.23602	0.0395749	1
ENSMUSG00000044378	Slc15a5	-1.1928	1.40102	4.23465	0.0396068	1
ENSMUSG00000028763	Hspg2	-0.497185	3.75005	4.23333	0.0396377	1
ENSMUSG00000054435	Gimap4	-0.461082	3.3605	4.23066	0.0397001	1
ENSMUSG00000055116	Arntl	0.910561	0.940174	4.22746	0.0397749	1
ENSMUSG00000030735	Gm9755	0.515194	3.29877	4.1766	0.0409859	1
ENSMUSG00000032080	Apoa4	0.687653	7.13459	4.17636	0.0409917	1
ENSMUSG00000072825	Cep170b	0.503921	4.79513	4.15336	0.041552	1
ENSMUSG00000100078	Gm6170	0.747642	1.21805	4.14643	0.0417225	1
ENSMUSG00000043505	Gimap5	-0.677705	-0.086167	4.13669	0.0419631	1
ENSMUSG00000031637	Lrp2bp	0.643752	1.32942	4.13547	0.0419933	1
ENSMUSG00000041762	Gpr155	0.455607	5.03146	4.12633	0.0422207	1
ENSMUSG00000082286	Pisd-ps1	-0.419816	4.16344	4.09801	0.0429338	1
ENSMUSG00000078817	Nlrp12	-1.19743	4.34882	4.0946	0.0430205	1
ENSMUSG00000001281	Itgb7	-0.674267	0.736918	4.08987	0.0431411	1
ENSMUSG00000034591	Slc41a2	1.17136	4.4144	4.07178	0.0436053	1
ENSMUSG00000069045	Ddx3y	3.57144	4.40275	4.06773	0.0437101	1
ENSMUSG00000028715	Cyp4a14	-1.07819	6.95039	4.0613	0.0438768	1
ENSMUSG00000072944	Nup62cl	1.09054	1.45334	4.05542	0.0440298	1
ENSMUSG00000069668	Sult3a1	2.21698	7.24421	4.04736	0.0442405	1
ENSMUSG00000042249	Grk3	-0.776453	1.93535	4.04603	0.0442754	1
ENSMUSG00000091421	Gm4202	0.793218	0.659886	4.04023	0.0444279	1
ENSMUSG00000079547	H2-DMb1	-0.756434	1.61589	4.01552	0.0450833	1
ENSMUSG00000027611	Procr	-0.885671	-0.502704	4.00405	0.0453911	1
ENSMUSG00000031535	Dkk4	-3.59734	-0.325386	3.96792	0.0463749	1
ENSMUSG00000111424	Gm48478	1.08567	0.34476	3.96724	0.0463938	1
ENSMUSG00000003721	Insig2	0.435408	6.39253	3.95629	0.0466966	1
ENSMUSG00000034748	Sirt6	-0.587988	1.78173	3.9486	0.0469103	1
ENSMUSG00000043015	Nemp2	-0.650963	0.213623	3.93354	0.0473321	1
ENSMUSG00000040006	Ginm1	0.418455	5.33473	3.93157	0.0473876	1
ENSMUSG00000060586	H2-Eb1	-0.554385	4.44768	3.90746	0.0480722	1
ENSMUSG00000041559	Fmod	-0.727739	0.0984089	3.89455	0.0484431	1
ENSMUSG00000082099	Gm12013	-0.750419	0.443855	3.88658	0.0486734	1
ENSMUSG00000030329	Pianp	0.586981	1.39865	3.87524	0.0490033	1
ENSMUSG00000025203	Scd2	0.77412	2.56052	3.87252	0.0490829	1
ENSMUSG00000024610	Cd74	-0.503247	6.01588	3.86658	0.0492569	1
ENSMUSG00000043633	Fam221b	-0.632222	0.829703	3.85924	0.0494728	1
ENSMUSG00000040471	Ggt6	0.531361	4.02256	3.83099	0.0503132	1
ENSMUSG00000049600	Zbtb45	-0.558578	3.8181	3.82414	0.0505191	1
ENSMUSG00000067144	Slc22a7	0.593137	6.24636	3.79861	0.0512952	1
ENSMUSG00000096891	Mup-ps8	-1.55551	0.940065	3.77991	0.0518716	1
ENSMUSG00000025422	Agap2	-0.916374	0.26777	3.75617	0.0526129	1
ENSMUSG00000028862	Map3k6	-0.986705	0.340418	3.74907	0.0528368	1
ENSMUSG00000082173	Mup-ps10	2.08421	3.33968	3.74507	0.0529634	1
ENSMUSG00000076609	Igkc	-0.888834	3.42453	3.74487	0.0529699	1
ENSMUSG00000042647	Acad12	0.452194	3.2288	3.72333	0.0536571	1
ENSMUSG00000067279	Ppp1r3c	0.76859	4.2975	3.72206	0.0536981	1
ENSMUSG00000102095	C730036E19Rik	-0.828435	4.44182	3.72083	0.0537377	1
ENSMUSG00000015501	Hivep2	-0.436523	3.11457	3.71139	0.0540423	1
ENSMUSG00000030177	Ccdc77	-0.591858	1.9295	3.71127	0.0540462	1
ENSMUSG00000040891	Foxa3	-0.555911	5.62838	3.6789	0.0551052	1
ENSMUSG00000109702	Gm45674	-0.81279	1.51947	3.66885	0.0554383	1
ENSMUSG00000094156	Sult2a7	1.03157	5.5296	3.66458	0.0555808	1
ENSMUSG00000096474	Gm5561	-0.928413	0.126723	3.65283	0.055974	1
ENSMUSG00000029468	P2rx7	-0.556025	1.33154	3.64606	0.0562019	1
ENSMUSG00000026610	Esrrg	0.725018	1.44787	3.62902	0.0567801	1
ENSMUSG00000107352	Gm43660	-0.645254	0.88507	3.61862	0.0571364	1
ENSMUSG00000025969	Nrp2	0.495727	4.12418	3.60186	0.057715	1
ENSMUSG00000022129	Dct	0.628683	4.22139	3.59584	0.0579244	1
ENSMUSG00000022070	Bora	-0.568471	1.08259	3.59216	0.0580526	1
ENSMUSG00000102824	Pdcd5-ps	-0.647506	0.152513	3.59091	0.0580965	1
ENSMUSG00000036862	Dchs1	-0.561726	0.979806	3.57977	0.0584873	1
ENSMUSG00000085028	Slc2a4rg-ps	-0.494061	3.92152	3.56472	0.0590197	1
ENSMUSG00000022508	Bcl6	1.09858	4.83028	3.54969	0.0595567	1
ENSMUSG00000032440	Tgfbr2	0.495387	4.47148	3.54756	0.0596332	1
ENSMUSG00000094948	Gm21286	2.3896	0.620893	3.54149	0.0598516	1
ENSMUSG00000029675	Eln	-0.782515	0.171152	3.52914	0.060299	1
ENSMUSG00000053925	Gm9929	-0.635331	0.506044	3.52859	0.060319	1
ENSMUSG00000032011	Thy1	-0.658983	0.291822	3.51947	0.0606518	1
ENSMUSG00000016128	Stard13	0.485313	4.13486	3.51835	0.0606928	1
ENSMUSG00000020538	Srebf1	0.677872	8.33627	3.51683	0.0607485	1
ENSMUSG00000059422	Gm8116	0.64657	1.39629	3.51643	0.0607631	1
ENSMUSG00000036469	2020-03-01	-0.632619	0.634051	3.51635	0.0607661	1
ENSMUSG00000034783	Cd207	-0.903672	2.36743	3.5149	0.0608191	1
ENSMUSG00000100658	F730311O21Rik	-0.821291	-0.373496	3.5147	0.0608265	1
ENSMUSG00000044786	Zfp36	0.630437	6.49253	3.50254	0.0612748	1
ENSMUSG00000003134	Tbc1d8	-0.368137	4.32436	3.49761	0.0614576	1
ENSMUSG00000028634	Hivep3	-0.680134	-0.0333336	3.4889	0.0617815	1
ENSMUSG00000000303	Cdh1	0.525684	4.24484	3.478	0.0621898	1
ENSMUSG00000095041	AC149090.1	-0.511483	7.42483	3.47731	0.0622157	1
ENSMUSG00000027676	Ccdc39	-0.58642	0.851011	3.47674	0.0622373	1
ENSMUSG00000021360	Gcnt2	0.398913	4.43498	3.47092	0.0624567	1
ENSMUSG00000041782	Lad1	1.20615	2.19857	3.46607	0.0626398	1
ENSMUSG00000024136	Dnase1l2	-0.769164	1.188	3.45059	0.0632293	1
ENSMUSG00000032609	Klhdc8b	-0.539809	4.19919	3.45038	0.0632374	1
ENSMUSG00000002020	Ltbp2	-0.747735	0.135764	3.44907	0.0632873	1
ENSMUSG00000034793	G6pc3	-0.460778	2.85634	3.44748	0.0633484	1
ENSMUSG00000072572	Slc39a2	-0.748173	1.72831	3.44207	0.0635559	1
ENSMUSG00000022372	Sla	-0.567497	1.18983	3.4267	0.0641501	1
ENSMUSG00000046667	Rbm12b1	-0.554074	2.59352	3.39845	0.0652578	1
ENSMUSG00000054474	Thnsl2	0.525833	5.34448	3.39301	0.0654733	1
ENSMUSG00000079491	H2-T10	0.798618	3.84	3.39298	0.0654744	1
ENSMUSG00000030577	Cd22	-0.594289	0.118795	3.39203	0.0655121	1
ENSMUSG00000034445	Cyb561a3	0.536113	2.94989	3.38679	0.065721	1
ENSMUSG00000111864	Rpl26-ps6	0.735827	0.0853092	3.37716	0.0661058	1
ENSMUSG00000079495	Nat8f6	0.803467	0.650496	3.37715	0.0661063	1
ENSMUSG00000037573	Tob1	0.56786	6.09156	3.36569	0.0665677	1
ENSMUSG00000039457	Ppl	0.497798	4.08297	3.35787	0.0668845	1
ENSMUSG00000042510	AA986860	-1.20833	1.13059	3.3478	0.0672948	1
ENSMUSG00000031304	Il2rg	-0.711962	0.390573	3.33957	0.0676324	1
ENSMUSG00000028976	Slc2a5	0.760957	3.62992	3.33501	0.0678201	1
ENSMUSG00000066071	Cyp4a12a	1.37073	8.1035	3.33357	0.0678793	1
ENSMUSG00000031489	Adrb3	-0.844342	2.46278	3.32863	0.0680835	1
ENSMUSG00000003992	Ssbp2	0.667922	1.01359	3.32779	0.0681185	1
ENSMUSG00000020593	Lpin1	-0.883952	7.52379	3.32199	0.0683591	1
ENSMUSG00000042087	4933440N22Rik	0.609474	0.248156	3.31943	0.0684655	1
ENSMUSG00000076490	Trbc1	-0.85848	-0.431062	3.305	0.0690695	1
ENSMUSG00000026630	Batf3	-0.65785	-0.234746	3.30199	0.0691961	1
ENSMUSG00000083261	Gm7816	0.544311	2.97235	3.30093	0.0692405	1
ENSMUSG00000041921	Metap1d	-0.378946	5.90075	3.28978	0.0697124	1
ENSMUSG00000074277	Phldb3	0.451078	2.23279	3.28576	0.0698832	1
ENSMUSG00000031740	Mmp2	-0.55309	0.630167	3.28051	0.0701071	1
ENSMUSG00000029752	Asns	1.77613	0.474794	3.27717	0.0702499	1
ENSMUSG00000041235	Chd7	-0.398958	4.23482	3.25775	0.0710866	1
ENSMUSG00000076617	Ighm	-1.25069	3.72754	3.25377	0.0712595	1
ENSMUSG00000108738	Gm44777	0.709738	-0.0563146	3.24131	0.0718034	1
ENSMUSG00000108591	Particl	-0.659347	-0.251613	3.23875	0.0719153	1
ENSMUSG00000030089	Slc41a3	-0.648961	0.635273	3.22711	0.0724283	1
ENSMUSG00000022962	Gart	0.437029	4.0965	3.21879	0.0727975	1
ENSMUSG00000041119	Pde9a	0.54783	3.4647	3.21291	0.0730596	1
ENSMUSG00000027694	Gm8325	0.650615	2.17577	3.20354	0.0734792	1
ENSMUSG00000074472	Zfp872	0.643596	0.044582	3.19591	0.0738226	1
ENSMUSG00000031903	Pla2g15	0.465937	4.197	3.18788	0.074186	1
ENSMUSG00000046794	Ppp1r3b	0.767035	8.09552	3.18508	0.0743134	1
ENSMUSG00000080059	Rps19-ps3	-0.712532	0.589008	3.18109	0.0744948	1
ENSMUSG00000090231	Cfb	0.924038	4.59691	3.17739	0.0746639	1
ENSMUSG00000083754	Gm7803	0.597983	0.373651	3.1645	0.0752557	1
ENSMUSG00000015659	Serac1	0.684415	1.17458	3.15707	0.0755986	1
ENSMUSG00000023284	Zfp605	0.93265	1.4172	3.15573	0.0756609	1
ENSMUSG00000043753	Dmrta1	1.01289	0.148858	3.14408	0.0762029	1
ENSMUSG00000039985	Sinhcaf	-0.600401	0.900728	3.14314	0.076247	1
ENSMUSG00000022504	Ciita	-0.585431	-0.0581385	3.13257	0.0767425	1
ENSMUSG00000023764	Sfi1	-0.451435	5.00471	3.11324	0.0776582	1
ENSMUSG00000080935	Got2-ps1	0.930884	1.38284	3.11141	0.0777455	1
ENSMUSG00000030096	Slc6a6	0.516525	5.8916	3.1112	0.0777555	1
ENSMUSG00000021091	Serpina3n	0.555417	8.66706	3.10531	0.0780373	1
ENSMUSG00000046159	Chrm3	1.04367	-0.536155	3.10455	0.0780739	1
ENSMUSG00000024222	Fkbp5	-0.971029	6.09981	3.08816	0.0788637	1
ENSMUSG00000041354	Rgl2	-0.428791	4.26003	3.08644	0.0789474	1
ENSMUSG00000016637	Ift27	-0.406851	2.84484	3.0855	0.0789929	1
ENSMUSG00000058809	Hspd1-ps3	0.442293	3.80415	3.07778	0.0793687	1
ENSMUSG00000062061	Obp2a	2.53486	1.55542	3.06968	0.0797652	1
ENSMUSG00000009378	Slc16a12	0.400191	6.51224	3.06836	0.0798301	1
ENSMUSG00000063480	Snu13	-0.393346	4.30191	3.06179	0.0801535	1
ENSMUSG00000061322	Dnaic1	-1.88152	-0.246193	3.0554	0.0804691	1
ENSMUSG00000032078	Zpr1	-0.691146	6.46279	3.05153	0.0806612	1
ENSMUSG00000103715	4933431K14Rik	-0.764094	0.150259	3.0443	0.0810211	1
ENSMUSG00000087484	2900089D17Rik	-0.861654	0.17516	3.04226	0.0811227	1
ENSMUSG00000024190	Dusp1	1.24096	5.5374	3.04221	0.0811256	1
ENSMUSG00000030610	Det1	-0.405106	2.57925	3.0403	0.0812208	1
ENSMUSG00000019734	Tmc4	-0.451879	2.4635	3.03924	0.0812737	1
ENSMUSG00000022615	Tymp	0.461109	4.79427	3.03789	0.0813414	1
ENSMUSG00000024118	Tedc2	-0.546039	6.73819	3.03504	0.0814845	1
ENSMUSG00000030309	Caprin2	-0.626725	1.09861	3.02947	0.0817647	1
ENSMUSG00000094320	Chchd2-ps	0.626297	0.798228	3.02551	0.0819645	1
ENSMUSG00000027347	Rasgrp1	-0.682224	0.146717	3.0202	0.0822335	1
ENSMUSG00000064356	mt-Atp8	0.669445	0.145337	3.01771	0.0823596	1
ENSMUSG00000021287	Xrcc3	-0.445305	2.20292	3.01376	0.0825606	1
ENSMUSG00000057722	Lepr	-0.654597	1.93987	3.01334	0.0825821	1
ENSMUSG00000102059	Gm20257	-0.587591	1.04722	2.99873	0.08333	1
ENSMUSG00000017405	Nek8	-0.443713	2.69537	2.99191	0.0836812	1
ENSMUSG00000058934	Igf1os	-0.876192	1.38681	2.98124	0.0842345	1
ENSMUSG00000036805	Noxa1	0.805923	-0.101925	2.97712	0.0844494	1
ENSMUSG00000055413	H2-Q5	-0.460659	3.02474	2.97567	0.0845252	1
ENSMUSG00000036957	Lrfn3	0.618893	1.05648	2.9642	0.0851266	1
ENSMUSG00000025876	Unc5a	-0.640628	0.351991	2.95958	0.0853703	1
ENSMUSG00000030827	Fgf21	-0.860821	-0.22039	2.95832	0.0854367	1
ENSMUSG00000026475	Rgs16	-0.761534	6.64253	2.95149	0.0857983	1
ENSMUSG00000079507	H2-Q1	0.82999	3.69839	2.94992	0.0858818	1
ENSMUSG00000082644	Mup-ps19	-0.650174	9.87412	2.9483	0.0859682	1
ENSMUSG00000109118	Gm32031	-0.729603	-0.147799	2.94709	0.0860322	1
ENSMUSG00000086682	Gm16023	-0.530433	0.619971	2.94676	0.08605	1
ENSMUSG00000025355	Mmp19	0.603058	5.25891	2.94556	0.0861138	1
ENSMUSG00000081344	Gm14303	-0.401973	4.26114	2.94308	0.086246	1
ENSMUSG00000017718	Afmid	0.414121	5.367	2.93797	0.0865195	1
ENSMUSG00000101210	Gm28720	-0.664142	0.220071	2.93415	0.0867245	1
ENSMUSG00000042644	Itpr3	-0.493724	1.07397	2.93217	0.0868307	1
ENSMUSG00000038042	Ptpdc1	-0.513703	0.88161	2.93192	0.0868444	1
ENSMUSG00000028007	Snx7	0.561037	3.94982	2.92692	0.0871135	1
ENSMUSG00000022032	Scara5	-1.3238	4.07785	2.92241	0.0873572	1
ENSMUSG00000030872	Gga2	0.461699	3.89083	2.90418	0.0883501	1
ENSMUSG00000044730	9930104L06Rik	-0.42435	2.38457	2.9016	0.0884919	1
ENSMUSG00000028657	Ppt1	0.39907	4.73753	2.90118	0.0885145	1
ENSMUSG00000093405	Gm20684	0.627035	0.846115	2.90083	0.0885338	1
ENSMUSG00000094786	Gm14403	0.521352	4.48923	2.89847	0.0886636	1
ENSMUSG00000066407	Gm10263	-0.657792	0.779476	2.89175	0.089034	1
ENSMUSG00000030924	Rexo5	-0.473214	2.00013	2.89119	0.0890653	1
ENSMUSG00000057605	Gm6807	-0.870863	0.354978	2.88833	0.0892234	1
ENSMUSG00000073968	Trim68	-0.738849	1.12011	2.88691	0.0893023	1
ENSMUSG00000100213	Gm28151	-0.912516	0.0920656	2.88108	0.0896257	1
ENSMUSG00000058905	Gm10051	-0.746704	1.31701	2.86905	0.0902981	1
ENSMUSG00000070576	Mn1	-0.537876	2.90997	2.8684	0.0903349	1
ENSMUSG00000073940	Hbb-bt	0.687286	5.09865	2.86466	0.090545	1
ENSMUSG00000030560	Ctsc	0.428035	6.53583	2.85993	0.0908113	1
ENSMUSG00000002289	Angptl4	-0.551989	6.6831	2.85146	0.091291	1
ENSMUSG00000008999	Bmp7	0.588371	1.07762	2.8506	0.0913397	1
ENSMUSG00000026779	Mastl	-0.570409	0.258102	2.8493	0.0914137	1
ENSMUSG00000058006	Mdn1	-0.366302	4.25758	2.84826	0.0914728	1
ENSMUSG00000026463	Atp2b4	-0.472621	2.15468	2.84768	0.0915057	1
ENSMUSG00000078650	G6pc	0.669554	7.95333	2.83587	0.0921812	1
ENSMUSG00000069919	Hba-a1	0.802369	6.54372	2.82956	0.0925437	1
ENSMUSG00000028982	Slc25a33	-0.748488	3.57892	2.82335	0.0929023	1
ENSMUSG00000107470	Gm3375	-0.492247	1.70085	2.81868	0.0931728	1
ENSMUSG00000062456	Rpl9-ps6	-0.479557	2.39413	2.81134	0.0936002	1
ENSMUSG00000022149	C9	0.462201	8.96192	2.80673	0.0938696	1
ENSMUSG00000066456	Hmgn3	0.610969	-0.2663	2.79348	0.0946485	1
ENSMUSG00000031906	Smpd3	0.907879	0.962349	2.79116	0.0947856	1
ENSMUSG00000030752	Kdm8	-0.481113	1.0657	2.78815	0.0949639	1
ENSMUSG00000092626	9130230N09Rik	-0.576001	0.250305	2.78758	0.0949976	1
ENSMUSG00000098284	A330093E20Rik	-0.558067	0.0989007	2.7869	0.0950379	1
ENSMUSG00000024778	Fas	0.449391	4.07224	2.78266	0.0952898	1
ENSMUSG00000042251	Pm20d1	0.457625	7.39557	2.76228	0.0965107	1
ENSMUSG00000053862	Slc51b	0.66811	-0.0464293	2.75836	0.0967472	1
ENSMUSG00000044783	Hjurp	-0.444217	7.17888	2.75767	0.0967894	1
ENSMUSG00000000782	Tcf7	-0.480162	1.83305	2.75563	0.0969127	1
ENSMUSG00000039220	Ppp1r10	-0.493569	4.78386	2.75356	0.0970379	1
ENSMUSG00000021661	Ankra2	-0.356246	3.59005	2.75295	0.0970753	1
ENSMUSG00000099881	2810013P06Rik	-0.486336	3.05919	2.7447	0.0975771	1
ENSMUSG00000074506	Gm10705	0.559673	1.24356	2.73782	0.0979985	1
ENSMUSG00000054417	Cyp3a44	0.689245	7.04424	2.73558	0.0981358	1
ENSMUSG00000040260	Daam2	-0.470186	1.42412	2.73482	0.0981827	1
ENSMUSG00000036330	Slc18a1	-0.713899	1.25127	2.73227	0.0983393	1
ENSMUSG00000031963	Bmper	0.720625	0.522389	2.73092	0.0984226	1
ENSMUSG00000038526	Car14	0.661284	4.68402	2.72864	0.0985634	1
ENSMUSG00000008035	Mid1ip1	0.625963	5.93409	2.72427	0.0988336	1
ENSMUSG00000050786	Ccdc126	0.512847	0.284472	2.72263	0.0989348	1
ENSMUSG00000035697	Arhgap45	-0.458698	3.5853	2.72245	0.0989461	1
ENSMUSG00000009292	Trpm2	-0.484139	2.72409	2.72207	0.0989696	1
ENSMUSG00000038002	Cramp1l	-0.330075	3.78836	2.71058	0.0996845	1
ENSMUSG00000024160	Spsb3	0.703791	0.202301	2.70258	0.100186	1
ENSMUSG00000102353	Gm38345	0.495502	1.85682	2.70064	0.100308	1
ENSMUSG00000036980	Taf6	0.518683	2.56726	2.69632	0.10058	1
ENSMUSG00000036246	Gmip	-0.44486	2.7801	2.69382	0.100738	1
ENSMUSG00000027395	Polr1b	-0.41673	4.00405	2.69343	0.100763	1
ENSMUSG00000090523	Gypc	0.446318	3.38315	2.69119	0.100904	1
ENSMUSG00000054863	Tafa5	0.57119	0.340648	2.69008	0.100975	1
ENSMUSG00000022887	Masp1	0.685411	4.75212	2.6855	0.101265	1
ENSMUSG00000039395	Mreg	0.441518	4.06906	2.67981	0.101628	1
ENSMUSG00000022010	Tsc22d1	0.640699	5.56173	2.67835	0.101721	1
ENSMUSG00000032641	Gpr19	-0.443386	1.42334	2.67437	0.101976	1
ENSMUSG00000030499	Kctd15	-0.546727	2.91328	2.67342	0.102036	1
ENSMUSG00000105909	Gm43189	-0.552583	2.18019	2.67226	0.102111	1
ENSMUSG00000029512	Ulk1	-0.387919	6.24807	2.66525	0.102562	1
ENSMUSG00000085913	Gm15601	0.658453	0.558061	2.6576	0.103056	1
ENSMUSG00000109408	A930037H05Rik	0.564203	0.358014	2.6516	0.103446	1
ENSMUSG00000027579	Srms	0.847726	-0.20913	2.65133	0.103463	1
ENSMUSG00000039853	Trim14	0.473079	2.52531	2.64776	0.103696	1
ENSMUSG00000026404	Ddx59	0.499572	2.18025	2.64774	0.103697	1
ENSMUSG00000002343	Armc6	0.423661	2.34489	2.64753	0.103711	1
ENSMUSG00000034786	Gpsm3	-0.531855	0.948215	2.64324	0.103991	1
ENSMUSG00000024579	Pcyox1l	-0.58639	0.112316	2.64176	0.104088	1
ENSMUSG00000102375	A930036K24Rik	0.596753	1.57851	2.64045	0.104174	1
ENSMUSG00000096606	Tpbgl	-0.412582	2.77507	2.63896	0.104272	1
ENSMUSG00000008305	Tle1	-0.460229	5.37152	2.63069	0.104816	1
ENSMUSG00000039377	Hlx	-0.627549	1.3408	2.63062	0.10482	1
ENSMUSG00000059901	Adamts14	-0.52924	0.458562	2.62053	0.105489	1
ENSMUSG00000106831	Ube2n-ps1	0.50793	1.35434	2.61768	0.105679	1
ENSMUSG00000081453	Gm6767	0.604775	0.965905	2.61625	0.105774	1
ENSMUSG00000047617	Paxx	0.71542	4.62127	2.60698	0.106394	1
ENSMUSG00000031101	Sash3	-0.525467	0.256126	2.60478	0.106542	1
ENSMUSG00000030220	Arhgdib	-0.506218	2.27029	2.59571	0.107154	1
ENSMUSG00000044211	Gm7887	0.609239	0.782611	2.59233	0.107382	1
ENSMUSG00000000732	Icosl	-0.577304	0.0263367	2.58877	0.107624	1
ENSMUSG00000028188	Spata1	-0.502858	0.945777	2.57315	0.108691	1
ENSMUSG00000053964	Lgals4	-0.579937	4.59033	2.56923	0.108961	1
ENSMUSG00000072770	Acrbp	-0.60955	1.82332	2.56854	0.109008	1
ENSMUSG00000029276	Glmn	0.509481	1.09897	2.56024	0.109582	1
ENSMUSG00000041733	Coq5	0.340994	4.70452	2.55501	0.109945	1
ENSMUSG00000067212	H2-T23	-0.446055	7.39288	2.54406	0.11071	1
ENSMUSG00000058351	Smim4	-0.464142	3.6157	2.54401	0.110713	1
ENSMUSG00000095159	Tubb4b-ps1	0.519522	1.67378	2.54269	0.110806	1
ENSMUSG00000034438	Gbp8	-0.560558	2.09253	2.53986	0.111004	1
ENSMUSG00000028274	Rngtt	0.390839	3.08419	2.53979	0.11101	1
ENSMUSG00000034917	Tjp3	0.595231	2.81455	2.53232	0.111536	1
ENSMUSG00000050627	Gpd1l	0.477792	5.34451	2.5308	0.111643	1
ENSMUSG00000089827	1700023H06Rik	-1.10713	0.69814	2.52865	0.111796	1
ENSMUSG00000051652	Lrrc3	0.33814	6.14238	2.52496	0.112058	1
ENSMUSG00000098330	Gtpbp4-ps1	1.66315	2.48596	2.5247	0.112076	1
ENSMUSG00000036372	Tmem258	-0.412726	5.48867	2.52286	0.112207	1
ENSMUSG00000021779	Thrb	0.376521	4.82673	2.51325	0.112893	1
ENSMUSG00000082016	Pgam1-ps2	0.566533	2.7929	2.51232	0.11296	1
ENSMUSG00000049580	Tsku	0.419103	7.82248	2.50829	0.113249	1
ENSMUSG00000027983	Cyp2u1	-0.483009	4.37408	2.50818	0.113256	1
ENSMUSG00000084309	Mup-ps20	1.6717	2.42089	2.50548	0.113451	1
ENSMUSG00000072612	Gm10382	0.921897	0.285454	2.49459	0.114238	1
ENSMUSG00000032637	Atxn2l	-0.333382	5.90066	2.49091	0.114506	1
ENSMUSG00000087404	Gm11752	0.837766	0.426695	2.49026	0.114553	1
ENSMUSG00000034584	Exph5	0.521405	2.94869	2.49015	0.114561	1
ENSMUSG00000102929	Gm37154	-0.55836	0.101055	2.48942	0.114614	1
ENSMUSG00000079550	Mpp4	-0.570832	2.30498	2.48576	0.114881	1
ENSMUSG00000107225	Gm43637	-0.527887	0.767399	2.48514	0.114926	1
ENSMUSG00000030246	Ldhb	0.485395	2.02322	2.48464	0.114962	1
ENSMUSG00000028238	Atp6v0d2	-0.470573	2.52262	2.47955	0.115335	1
ENSMUSG00000002983	Relb	-0.502004	0.564003	2.47948	0.11534	1
ENSMUSG00000075702	Selenom	-0.523469	0.707431	2.47485	0.11568	1
ENSMUSG00000063590	Slc22a28	0.43614	5.0501	2.4647	0.11643	1
ENSMUSG00000024174	Pot1b	-0.412563	2.06075	2.46457	0.116439	1
ENSMUSG00000034881	Tbxa2r	-0.482561	0.426791	2.46039	0.11675	1
ENSMUSG00000097328	Tnfsf12	-0.573777	2.32633	2.45929	0.116832	1
ENSMUSG00000099875	Rbm3-ps	-0.595884	-0.190823	2.45715	0.116991	1
ENSMUSG00000039323	Igfbp2	-0.743972	7.98495	2.45549	0.117114	1
ENSMUSG00000102425	Gm26616	-0.494473	0.512941	2.45458	0.117183	1
ENSMUSG00000021947	Cryl1	0.536643	4.86385	2.4531	0.117293	1
ENSMUSG00000048731	Ggnbp1	-0.470629	4.23316	2.43919	0.118337	1
ENSMUSG00000011752	Pgam1	0.462616	5.16871	2.43906	0.118347	1
ENSMUSG00000026637	Traf5	0.459125	2.22551	2.43655	0.118537	1
ENSMUSG00000020319	Wdpcp	0.503157	0.876742	2.43635	0.118552	1
ENSMUSG00000032125	Robo4	-0.416509	3.30177	2.43111	0.118948	1
ENSMUSG00000086825	Gm15675	-0.68582	2.79151	2.42958	0.119065	1
ENSMUSG00000024403	Atp6v1g2	-0.486854	0.854978	2.42539	0.119384	1
ENSMUSG00000062866	Phactr2	-0.436675	2.05393	2.4251	0.119406	1
ENSMUSG00000027360	Hdc	-0.800659	3.19402	2.42422	0.119473	1
ENSMUSG00000030494	Rhpn2	0.379394	3.74276	2.42336	0.119539	1
ENSMUSG00000101397	Mug-ps1	-0.528374	7.01671	2.4217	0.119665	1
ENSMUSG00000021591	Glrx	0.610588	5.11145	2.41957	0.119828	1
ENSMUSG00000031974	Abcb10	0.380023	4.77223	2.41521	0.120162	1
ENSMUSG00000027394	Ttl	0.36836	3.02846	2.41431	0.120231	1
ENSMUSG00000031864	Ints10	0.460055	2.9392	2.41365	0.120282	1
ENSMUSG00000024854	Pold4	-0.343066	3.72923	2.40956	0.120597	1
ENSMUSG00000022120	Rnf219	-0.593117	0.111424	2.40101	0.121257	1
ENSMUSG00000107023	Gm42715	-0.583113	0.957702	2.39942	0.12138	1
ENSMUSG00000020644	Id2	0.332241	6.91328	2.38808	0.122263	1
ENSMUSG00000025586	Cpeb1	-0.42946	2.90923	2.38178	0.122758	1
ENSMUSG00000036864	Proser3	-0.501155	1.51915	2.38069	0.122844	1
ENSMUSG00000039063	Echdc3	0.396863	6.45054	2.37992	0.122904	1
ENSMUSG00000020914	Top2a	0.996369	0.981907	2.37859	0.123009	1
ENSMUSG00000066153	Mup21	-0.566668	6.76985	2.36848	0.123807	1
ENSMUSG00000090698	Apold1	0.492006	0.394318	2.36488	0.124094	1
ENSMUSG00000037904	Ankrd9	0.544538	2.21715	2.36461	0.124115	1
ENSMUSG00000070690	Albfm1	-0.323703	4.97458	2.36126	0.124382	1
ENSMUSG00000032661	Oas3	0.688688	0.114962	2.35565	0.12483	1
ENSMUSG00000050310	Rictor	-0.318007	4.35547	2.35211	0.125114	1
ENSMUSG00000048949	Gm6206	0.486709	2.12971	2.35071	0.125226	1
ENSMUSG00000027398	Il1b	0.531158	0.527451	2.34984	0.125295	1
ENSMUSG00000018537	Pcgf2	-0.585994	1.94327	2.34883	0.125377	1
ENSMUSG00000059040	Eno1b	-1.46515	4.66784	2.34571	0.125628	1
ENSMUSG00000059540	Tcea2	-0.482108	0.134061	2.34469	0.12571	1
ENSMUSG00000073079	Srp54a	-0.596873	0.615018	2.33925	0.12615	1
ENSMUSG00000020185	E2f7	-0.779093	1.22413	2.3387	0.126195	1
ENSMUSG00000035441	Myo1d	0.450322	3.26939	2.3349	0.126503	1
ENSMUSG00000040584	Abcb1a	0.547127	2.8789	2.33144	0.126785	1
ENSMUSG00000024761	Gm16437	0.485379	0.28937	2.33112	0.126811	1
ENSMUSG00000087132	A930001C03Rik	-0.592396	-0.242473	2.32785	0.127078	1
ENSMUSG00000051910	Sox6	0.381111	3.58333	2.3259	0.127236	1
ENSMUSG00000074782	4833422C13Rik	-0.630121	0.00908896	2.32544	0.127275	1
ENSMUSG00000029869	Ephb6	0.680989	-0.543525	2.32451	0.12735	1
ENSMUSG00000074476	Spc24	0.379613	3.98805	2.3141	0.128205	1
ENSMUSG00000026034	Clk1	-0.419875	6.53013	2.31247	0.12834	1
ENSMUSG00000027751	Supt20	-0.352529	4.42769	2.31044	0.128507	1
ENSMUSG00000033065	Pfkm	0.364881	3.92181	2.30393	0.129047	1
ENSMUSG00000090555	Gm8893	1.13697	8.48631	2.30334	0.129096	1
ENSMUSG00000020205	Phlda1	-0.860138	5.52347	2.30275	0.129145	1
ENSMUSG00000024292	Cyp4f14	0.402113	7.93555	2.29899	0.129458	1
ENSMUSG00000006711	D130043K22Rik	0.489597	2.87064	2.29882	0.129472	1
ENSMUSG00000022604	Cep97	-0.498846	2.12934	2.29822	0.129522	1
ENSMUSG00000035314	Gdpd5	-0.512312	-0.409404	2.2942	0.129858	1
ENSMUSG00000004665	Cnn2	-0.405002	2.23575	2.2934	0.129925	1
ENSMUSG00000056290	Ms4a4b	-0.68734	-0.491692	2.29138	0.130094	1
ENSMUSG00000097974	Gm10605	-0.471836	0.772936	2.29025	0.130189	1
ENSMUSG00000079523	Tmsb10	-0.434	2.84491	2.29006	0.130205	1
ENSMUSG00000025085	Ablim1	0.50707	4.27805	2.28419	0.130699	1
ENSMUSG00000051000	Fam160a1	-0.431204	1.40636	2.2832	0.130782	1
ENSMUSG00000111521	Gm48529	-0.518166	0.49177	2.2818	0.1309	1
ENSMUSG00000000686	Abhd15	0.401532	3.324	2.28099	0.130969	1
ENSMUSG00000052142	Rasal3	-0.481503	-0.018335	2.27943	0.1311	1
ENSMUSG00000066154	Mup3	-0.420786	13.077	2.27377	0.13158	1
ENSMUSG00000020038	Cry1	0.399428	3.60869	2.27133	0.131787	1
ENSMUSG00000067071	Hes6	0.410146	6.7108	2.26919	0.131969	1
ENSMUSG00000004996	Mri1	-0.390164	3.93333	2.26792	0.132077	1
ENSMUSG00000053137	Mapk11	-0.452914	0.532768	2.26743	0.132119	1
ENSMUSG00000034263	Ints14	0.384143	3.21991	2.26432	0.132384	1
ENSMUSG00000005465	Il27ra	-0.449271	0.525765	2.26294	0.132503	1
ENSMUSG00000042155	Klhl23	-0.512977	0.11895	2.26291	0.132505	1
ENSMUSG00000072568	Lratd2	0.412063	3.55056	2.26261	0.132531	1
ENSMUSG00000031958	Ldhd	0.420727	7.21323	2.25283	0.13337	1
ENSMUSG00000044149	Nkrf	-0.439355	1.91765	2.25275	0.133377	1
ENSMUSG00000000441	Raf1	0.549321	4.33885	2.25153	0.133482	1
ENSMUSG00000067608	Pcna-ps2	0.685231	2.898	2.25131	0.133502	1
ENSMUSG00000090272	Mndal	-0.596931	3.31168	2.24964	0.133646	1
ENSMUSG00000021118	Plek2	0.53746	-0.385279	2.24603	0.133958	1
ENSMUSG00000035914	Cd276	0.552468	1.39948	2.24481	0.134063	1
ENSMUSG00000075028	Prdm11	-0.543481	0.297341	2.24384	0.134147	1
ENSMUSG00000028329	Xpa	-0.404872	3.25175	2.23034	0.135324	1
ENSMUSG00000037525	Bcdin3d	-0.404641	1.44089	2.22442	0.135843	1
ENSMUSG00000015126	Tsr3	-0.340511	3.73961	2.22369	0.135908	1
ENSMUSG00000028712	Cyp4a31	-0.876477	1.83653	2.22065	0.136176	1
ENSMUSG00000020437	Myo1g	-0.447172	1.02488	2.21704	0.136494	1
ENSMUSG00000033157	Abhd10	-0.394154	2.43614	2.2169	0.136507	1
ENSMUSG00000024887	Asah2	0.467633	3.96753	2.21374	0.136787	1
ENSMUSG00000026435	Slc45a3	0.570573	4.32995	2.21173	0.136965	1
ENSMUSG00000082588	Gm15443	-0.547141	0.225958	2.2079	0.137306	1
ENSMUSG00000037872	Ackr1	0.661323	0.652095	2.2053	0.137537	1
ENSMUSG00000025235	Bbs4	-0.459654	1.39237	2.19525	0.138436	1
ENSMUSG00000041439	Mfsd6	0.346319	3.21923	2.19471	0.138485	1
ENSMUSG00000035696	Rnf38	-0.441188	3.64676	2.19121	0.1388	1
ENSMUSG00000074272	Ceacam1	0.380437	6.41662	2.1881	0.139081	1
ENSMUSG00000027722	Spata5	-0.413982	2.45525	2.18745	0.13914	1
ENSMUSG00000036281	Snapc4	-0.388376	3.35328	2.18183	0.139649	1
ENSMUSG00000052825	Gm9892	0.567948	1.0708	2.17963	0.139848	1
ENSMUSG00000005615	Pcyt1a	0.461778	6.2571	2.17934	0.139875	1
ENSMUSG00000070639	Lrrc8b	0.597907	-0.168734	2.17874	0.139929	1
ENSMUSG00000070687	Htr1d	1.42096	0.673667	2.17732	0.140058	1
ENSMUSG00000039616	Mocos	0.400678	5.19959	2.17391	0.140369	1
ENSMUSG00000034855	Cxcl10	-0.429081	1.57261	2.17356	0.140401	1
ENSMUSG00000059970	Hspa2	0.469325	1.81399	2.17261	0.140487	1
ENSMUSG00000033530	Ttc7b	0.3844	3.75511	2.17251	0.140497	1
ENSMUSG00000058240	Cryzl1	-0.32356	3.38423	2.17212	0.140532	1
ENSMUSG00000091784	Gm17022	-0.619393	-0.0368714	2.17021	0.140707	1
ENSMUSG00000017868	Sgk2	0.465829	4.63202	2.16517	0.141169	1
ENSMUSG00000010453	Kansl3	-0.314574	5.60787	2.1539	0.142209	1
ENSMUSG00000030806	Stx1b	-0.458611	0.654026	2.15285	0.142306	1
ENSMUSG00000021815	Mss51	-0.574208	-0.0407096	2.14943	0.142623	1
ENSMUSG00000040466	Blvrb	-0.354936	6.83313	2.14907	0.142656	1
ENSMUSG00000040848	Sft2d2	0.375263	5.74556	2.14897	0.142666	1
ENSMUSG00000022994	Adcy6	-0.322873	4.55501	2.14392	0.143136	1
ENSMUSG00000110945	Gm9856	-0.505119	-0.0183464	2.14388	0.14314	1
ENSMUSG00000039552	Rsph4a	1.31821	0.812951	2.14189	0.143325	1
ENSMUSG00000040592	Cd79b	-0.602104	0.183224	2.14182	0.143332	1
ENSMUSG00000030701	Plekhb1	0.366547	4.94422	2.14033	0.143471	1
ENSMUSG00000111429	Gm32511	-0.420675	1.33885	2.1399	0.143512	1
ENSMUSG00000029438	Bcl7a	-0.435308	3.60074	2.13951	0.143548	1
ENSMUSG00000030330	Ing4	-0.581943	0.694529	2.1392	0.143576	1
ENSMUSG00000001300	Efnb2	0.46697	1.56909	2.13839	0.143652	1
ENSMUSG00000042485	Mustn1	-0.524421	1.34343	2.13824	0.143667	1
ENSMUSG00000036452	Arhgap26	0.480896	4.53911	2.13778	0.14371	1
ENSMUSG00000079036	Alkbh1	-0.343993	3.30355	2.1366	0.14382	1
ENSMUSG00000059939	9430015G10Rik	-0.409602	3.14922	2.136	0.143877	1
ENSMUSG00000079737	3110001I22Rik	-0.471074	1.07411	2.13584	0.143892	1
ENSMUSG00000030207	Fam234b	-0.287306	4.39693	2.13214	0.14424	1
ENSMUSG00000018547	Pip4k2b	0.301258	3.98955	2.13099	0.144348	1
ENSMUSG00000017929	B4galt5	0.347874	5.20162	2.129	0.144535	1
ENSMUSG00000078762	Haus5	-0.505457	0.495284	2.12643	0.144778	1
ENSMUSG00000028717	Tal1	-0.57005	0.41486	2.12279	0.145122	1
ENSMUSG00000086010	Gm15318	0.534016	3.22374	2.12087	0.145304	1
ENSMUSG00000059363	Fxn	-0.358165	3.39376	2.12079	0.145312	1
ENSMUSG00000021366	Hivep1	-0.459016	3.45181	2.11676	0.145695	1
ENSMUSG00000072972	Adam4	-0.555205	0.267241	2.11103	0.146241	1
ENSMUSG00000043870	Gm5809	0.74748	0.281102	2.1093	0.146406	1
ENSMUSG00000001247	Lsr	0.364672	5.49169	2.10643	0.146681	1
ENSMUSG00000069892	9930111J21Rik2	0.470849	0.284204	2.10474	0.146843	1
ENSMUSG00000052013	Btla	-0.566973	0.0755041	2.10288	0.147022	1
ENSMUSG00000021258	Ccnk	-0.300142	3.80232	2.10169	0.147136	1
ENSMUSG00000041827	Oasl1	0.626642	3.22911	2.09893	0.147402	1
ENSMUSG00000018378	Cuedc1	-0.47934	1.35562	2.09789	0.147502	1
ENSMUSG00000032077	Bud13	-0.52118	2.48685	2.09749	0.147541	1
ENSMUSG00000085783	Gm9816	0.451061	1.54661	2.0964	0.147646	1
ENSMUSG00000023912	Slc25a27	-0.631144	1.07752	2.09482	0.147799	1
ENSMUSG00000035878	Hykk	-0.337442	6.20847	2.09429	0.147851	1
ENSMUSG00000089873	Mup13	-1.09437	6.57025	2.09364	0.147914	1
ENSMUSG00000024451	Arap3	-0.364655	3.57219	2.09011	0.148256	1
ENSMUSG00000066278	Vps37b	0.366955	2.35633	2.08833	0.148428	1
ENSMUSG00000079884	Gm10698	0.543998	2.89398	2.08585	0.148669	1
ENSMUSG00000031669	Gins3	0.56262	-0.0564106	2.08514	0.148738	1
ENSMUSG00000056671	Prelid2	0.515335	-0.284886	2.08368	0.14888	1
ENSMUSG00000026972	Arrdc1	-0.49441	1.8825	2.08346	0.148902	1
ENSMUSG00000093661	Eif4e3	0.463047	2.70049	2.07938	0.149301	1
ENSMUSG00000029647	Pan3	-0.392854	4.69417	2.0793	0.149309	1
ENSMUSG00000042138	Msantd2	-0.500452	3.35002	2.07596	0.149636	1
ENSMUSG00000003526	Prodh	0.372784	8.20262	2.07512	0.149719	1
ENSMUSG00000032946	Rasgrp2	-0.362919	4.17789	2.07344	0.149883	1
ENSMUSG00000104222	Gm7292	0.532918	1.82919	2.07002	0.15022	1
ENSMUSG00000085711	Gm15163	0.552633	3.6397	2.06803	0.150416	1
ENSMUSG00000020429	Igfbp1	-1.13714	3.13404	2.06649	0.150568	1
ENSMUSG00000071551	Akr1c19	0.53437	6.71855	2.06311	0.150902	1
ENSMUSG00000045672	Col27a1	0.478137	6.77972	2.0606	0.15115	1
ENSMUSG00000024260	Sap130	-0.31679	4.21094	2.05765	0.151443	1
ENSMUSG00000021665	Hexb	0.405875	3.16773	2.05576	0.151632	1
ENSMUSG00000021823	Vcl	0.6719	2.7627	2.05453	0.151754	1
ENSMUSG00000032735	Ablim3	-0.409345	4.51268	2.05192	0.152014	1
ENSMUSG00000038500	Prr3	-0.395563	2.93691	2.0519	0.152017	1
ENSMUSG00000096956	Snhg18	-0.538193	0.047148	2.05027	0.152179	1
ENSMUSG00000035513	Ntng2	-0.734538	0.375241	2.04934	0.152272	1
ENSMUSG00000038368	Focad	0.524484	2.71746	2.04786	0.15242	1
ENSMUSG00000020250	Txnrd1	0.320546	6.47566	2.04573	0.152634	1
ENSMUSG00000034853	Acot11	0.953031	4.11838	2.04505	0.152702	1
ENSMUSG00000105957	Gm43254	-0.506057	-0.26301	2.04193	0.153015	1
ENSMUSG00000029797	Sspo	0.49751	2.16856	2.03978	0.153232	1
ENSMUSG00000021559	Dapk1	0.322859	5.60979	2.03711	0.153501	1
ENSMUSG00000028648	Ndufs5	-0.436522	5.49832	2.0365	0.153562	1
ENSMUSG00000054499	Dedd2	-0.334749	4.09458	2.03445	0.15377	1
ENSMUSG00000106990	Gm42547	-0.479613	1.56216	2.03384	0.153832	1
ENSMUSG00000025885	Myo5b	0.432005	4.08581	2.03349	0.153867	1
ENSMUSG00000058624	Gda	0.340509	5.31787	2.03184	0.154034	1
ENSMUSG00000099471	Gm8451	-0.539286	0.673414	2.03127	0.154092	1
ENSMUSG00000073155	1810058I24Rik	-0.351829	6.63927	2.03116	0.154103	1
ENSMUSG00000003316	Glg1	0.447026	4.30208	2.03065	0.154155	1
ENSMUSG00000001270	Ckb	-0.43082	2.20669	2.03013	0.154207	1
ENSMUSG00000001288	Rarg	-0.400919	2.49554	2.02407	0.154824	1
ENSMUSG00000026819	Slc25a25	0.85992	7.14098	2.02217	0.155017	1
ENSMUSG00000020661	Dnmt3a	-0.338822	3.9784	2.02167	0.155068	1
ENSMUSG00000029723	Tsc22d4	-0.338093	2.87328	2.01763	0.155481	1
ENSMUSG00000015942	Gtf2ird2	-0.364109	2.60042	2.01694	0.155553	1
ENSMUSG00000027784	Ppm1l	0.285853	3.75097	2.01329	0.155927	1
ENSMUSG00000040564	Apoc1	-0.379381	11.8982	2.01169	0.156091	1
ENSMUSG00000001248	Gramd1a	-0.427377	4.27837	2.0095	0.156317	1
ENSMUSG00000044562	Rasip1	-0.422051	1.74859	2.00327	0.15696	1
ENSMUSG00000040264	Gbp2b	-0.469432	1.64476	2.00256	0.157034	1
ENSMUSG00000035078	Mtmr9	0.64531	2.76161	2.00166	0.157127	1
ENSMUSG00000026614	Slc30a10	0.420733	4.74713	1.99779	0.157529	1
ENSMUSG00000026279	Thap4	-0.407477	2.96224	1.99648	0.157665	1
ENSMUSG00000099858	Gm6652	0.47094	5.79848	1.99598	0.157717	1
ENSMUSG00000040263	Klhdc4	-0.344927	3.41481	1.99458	0.157863	1
ENSMUSG00000002233	Rhoc	-0.348009	2.81088	1.98779	0.158572	1
ENSMUSG00000069755	Zfp125	-0.502559	1.68514	1.98696	0.158659	1
ENSMUSG00000026890	Lhx6	0.53565	1.6876	1.98506	0.158859	1
ENSMUSG00000022639	Dubr	-0.454196	0.0903447	1.98316	0.159058	1
ENSMUSG00000084839	Gm14097	-0.456719	1.9404	1.97941	0.159453	1
ENSMUSG00000070960	Gm19680	0.496771	3.32042	1.9791	0.159485	1
ENSMUSG00000031642	Sh3rf1	-0.422593	1.42644	1.97825	0.159575	1
ENSMUSG00000022587	Ly6e	0.393815	7.67465	1.97423	0.16	1
ENSMUSG00000001983	Taco1	0.606687	3.01985	1.9739	0.160034	1
ENSMUSG00000103649	Gm37768	-0.55776	0.540289	1.97308	0.160121	1
ENSMUSG00000086725	A630052C17Rik	-0.498819	1.08037	1.97235	0.160199	1
ENSMUSG00000074345	Tnfaip8l3	0.423736	0.18501	1.9713	0.160309	1
ENSMUSG00000027111	Itga6	0.407531	1.32517	1.9712	0.16032	1
ENSMUSG00000044937	Ttc41	-0.629882	2.17469	1.97112	0.160329	1
ENSMUSG00000042747	Krtcap2	-0.325195	5.70297	1.96443	0.16104	1
ENSMUSG00000083373	Gm13392	-0.467747	1.64327	1.96279	0.161215	1
ENSMUSG00000028952	Zbtb48	-0.356287	4.21961	1.96263	0.161233	1
ENSMUSG00000092471	Cyp21a2-ps	-0.717822	3.15059	1.96195	0.161305	1
ENSMUSG00000020788	Atp2a3	-0.508445	0.560228	1.96017	0.161495	1
ENSMUSG00000042129	Rassf4	-0.344556	2.0996	1.95923	0.161596	1
ENSMUSG00000042363	Lgalsl	0.450132	2.93547	1.95757	0.161773	1
ENSMUSG00000037253	Mex3c	0.322784	3.66536	1.95324	0.162239	1
ENSMUSG00000024052	Lpin2	-0.380965	8.0111	1.95085	0.162495	1
ENSMUSG00000027339	Rassf2	-0.43156	0.71007	1.94984	0.162604	1
ENSMUSG00000032306	Mpi	0.363382	3.2633	1.94933	0.162659	1
ENSMUSG00000029119	Man2b2	0.365464	4.96547	1.94882	0.162714	1
ENSMUSG00000014852	Adamts13	0.491174	3.00706	1.94863	0.162734	1
ENSMUSG00000051184	Zfp524	-0.399463	2.38245	1.94778	0.162827	1
ENSMUSG00000050953	Gja1	-0.36368	2.08685	1.94759	0.162847	1
ENSMUSG00000034101	Ctnnd1	-0.300627	4.6489	1.94726	0.162883	1
ENSMUSG00000028464	Tpm2	-0.78482	1.45165	1.9469	0.162921	1
ENSMUSG00000097426	Gm8941	0.522525	4.61667	1.94636	0.16298	1
ENSMUSG00000025466	Fuom	0.317872	4.999	1.94349	0.16329	1
ENSMUSG00000080904	Gm11966	-0.497564	1.62937	1.94338	0.163302	1
ENSMUSG00000028926	Cdk14	-0.452731	0.280672	1.94153	0.163502	1
ENSMUSG00000083670	Gm6829	0.473628	0.131821	1.9377	0.163919	1
ENSMUSG00000050697	Prkaa1	0.32642	3.62879	1.93529	0.16418	1
ENSMUSG00000110631	Gm42047	-2.69939	4.25782	1.9328	0.164453	1
ENSMUSG00000035637	Grhpr	-0.327582	6.97655	1.93179	0.164562	1
ENSMUSG00000079429	Mroh2a	-0.506847	3.20423	1.92938	0.164827	1
ENSMUSG00000111709	Gm3776	0.983511	0.177877	1.92636	0.165157	1
ENSMUSG00000023800	Tiam2	0.451396	4.15377	1.92496	0.165311	1
ENSMUSG00000058761	Rnf169	-0.341218	5.82236	1.92369	0.16545	1
ENSMUSG00000024781	Lipa	0.380439	7.38002	1.92054	0.165797	1
ENSMUSG00000056476	Med12l	0.621078	0.336246	1.91475	0.166437	1
ENSMUSG00000096546	Smlr1	0.367869	4.96928	1.91159	0.166786	1
ENSMUSG00000002058	Unc119	-0.515048	2.08164	1.9109	0.166864	1
ENSMUSG00000024236	Svil	0.51204	4.46397	1.90837	0.167144	1
ENSMUSG00000017778	Cox7c	-0.334092	7.50115	1.90316	0.167725	1
ENSMUSG00000044328	Trp53i13	-0.440109	1.18278	1.90214	0.167839	1
ENSMUSG00000033933	Vhl	0.289357	3.63551	1.90095	0.167972	1
ENSMUSG00000036553	Sh3tc1	-0.353744	2.5151	1.89288	0.168877	1
ENSMUSG00000026278	Bok	-0.403817	2.59974	1.89207	0.168968	1
ENSMUSG00000036151	Tm6sf2	0.360932	5.00192	1.89187	0.168991	1
ENSMUSG00000025195	Dnmbp	-0.320051	4.73164	1.89147	0.169037	1
ENSMUSG00000018574	Acadvl	0.510575	6.95372	1.89094	0.169096	1
ENSMUSG00000081944	Gm12276	-0.442291	0.541312	1.89018	0.169181	1
ENSMUSG00000031762	Mt2	-1.68988	3.23621	1.88996	0.169207	1
ENSMUSG00000072940	Gm10443	-0.486867	1.40073	1.8881	0.169417	1
ENSMUSG00000023150	Ivns1abp	-0.347544	7.05187	1.8878	0.169451	1
ENSMUSG00000033684	Qsox1	0.348947	8.34961	1.88697	0.169544	1
ENSMUSG00000109179	Gm35339	-0.41576	2.07864	1.88616	0.169635	1
ENSMUSG00000021773	Comtd1	-0.470348	0.302565	1.88616	0.169636	1
ENSMUSG00000100691	2010320M18Rik	-0.383048	2.67117	1.88337	0.169952	1
ENSMUSG00000105677	Gm43328	0.454628	0.107718	1.88174	0.170136	1
ENSMUSG00000042737	Dpm3	-0.301671	4.32141	1.88093	0.170228	1
ENSMUSG00000038342	Mlxip	-0.348913	3.43676	1.88059	0.170268	1
ENSMUSG00000022769	Sdf2l1	-0.863154	4.54171	1.87897	0.170452	1
ENSMUSG00000100826	Snhg14	-0.438579	0.980877	1.87696	0.170681	1
ENSMUSG00000041482	Piezo2	-0.547684	0.787834	1.8765	0.170732	1
ENSMUSG00000029260	Ugt2b34	0.357119	8.91553	1.87537	0.170862	1
ENSMUSG00000050423	Ppp1r3g	-0.956737	0.723679	1.87512	0.17089	1
ENSMUSG00000043091	Tuba1c	0.49894	6.06157	1.87345	0.17108	1
ENSMUSG00000031712	Il15	0.366306	1.25168	1.87271	0.171165	1
ENSMUSG00000091549	Gm6548	0.333698	3.1939	1.87254	0.171184	1
ENSMUSG00000072964	Bhlhb9	-0.520301	0.794515	1.86952	0.17153	1
ENSMUSG00000049404	Rarres1	-0.394463	5.49723	1.86951	0.171532	1
ENSMUSG00000064294	Aox3	0.432901	8.72757	1.86855	0.171642	1
ENSMUSG00000029153	Ociad2	-0.794421	4.54031	1.86652	0.171874	1
ENSMUSG00000060377	Rpl36a-ps1	-0.638339	1.07863	1.86572	0.171966	1
ENSMUSG00000022440	C1qtnf6	-0.453526	0.0141222	1.86547	0.171994	1
ENSMUSG00000057315	Arhgap24	0.544572	2.03104	1.86149	0.172453	1
ENSMUSG00000030022	Adamts9	0.469894	0.550083	1.8589	0.172751	1
ENSMUSG00000039206	Daglb	0.388006	3.63104	1.85663	0.173014	1
ENSMUSG00000020424	Castor1	-0.437394	0.560568	1.8558	0.17311	1
ENSMUSG00000035357	Pdzrn3	-0.918566	0.58568	1.85395	0.173324	1
ENSMUSG00000023952	Gtpbp2	-0.280287	5.21585	1.85162	0.173595	1
ENSMUSG00000027346	Gpcpd1	-0.485545	7.03813	1.85024	0.173756	1
ENSMUSG00000089781	Gm15756	0.608638	0.634057	1.8499	0.173795	1
ENSMUSG00000030236	Slco1b2	0.429552	10.1706	1.84925	0.17387	1
ENSMUSG00000039533	Mmd2	-0.90466	2.50272	1.84807	0.174008	1
ENSMUSG00000085396	Firre	-0.346393	5.99469	1.84742	0.174084	1
ENSMUSG00000052889	Prkcb	-0.434403	0.775574	1.84709	0.174122	1
ENSMUSG00000059159	Gm8129	-0.557225	0.226371	1.8466	0.17418	1
ENSMUSG00000067149	Jchain	-0.663876	1.27281	1.84596	0.174253	1
ENSMUSG00000017764	Zswim1	0.487718	1.44548	1.84305	0.174594	1
ENSMUSG00000110750	Gm48702	-0.420162	0.25383	1.84252	0.174655	1
ENSMUSG00000078919	Dpm1	-0.324443	3.0293	1.83925	0.175039	1
ENSMUSG00000039929	Urb1	-0.358128	2.78154	1.83783	0.175205	1
ENSMUSG00000029032	Arhgef16	0.457002	1.60078	1.83729	0.175268	1
ENSMUSG00000032300	1700017B05Rik	0.353991	2.94541	1.83511	0.175526	1
ENSMUSG00000032193	Ldlr	0.332536	7.30765	1.83398	0.175659	1
ENSMUSG00000097994	Gm26982	-0.380383	0.956313	1.83265	0.175814	1
ENSMUSG00000073422	H2-Ke6	-0.552114	0.12583	1.83226	0.175861	1
ENSMUSG00000056608	Chd9	-0.419046	5.62484	1.83186	0.175908	1
ENSMUSG00000061411	Nol4l	0.493089	0.199592	1.83081	0.176032	1
ENSMUSG00000034640	Tiparp	0.360881	3.00521	1.83073	0.176041	1
ENSMUSG00000027070	Lrp2	1.08133	-0.291684	1.82876	0.176274	1
ENSMUSG00000035561	Aldh1b1	0.710356	6.48255	1.82869	0.176283	1
ENSMUSG00000061906	Ugt2b38	0.710776	6.72127	1.82826	0.176333	1
ENSMUSG00000045294	Insig1	0.40323	8.50165	1.82799	0.176365	1
ENSMUSG00000036885	Arhgef26	-0.329833	5.56602	1.82796	0.176369	1
ENSMUSG00000048154	Kmt2d	-0.282391	5.6954	1.82752	0.17642	1
ENSMUSG00000055897	Ppp4r1l-ps	-0.341813	3.72303	1.82626	0.17657	1
ENSMUSG00000086290	Snhg12	-0.387425	3.38735	1.82596	0.176606	1
ENSMUSG00000023007	Prpf40b	-0.362738	3.96565	1.82564	0.176643	1
ENSMUSG00000020829	Slc46a1	0.302992	5.19995	1.82548	0.176662	1
ENSMUSG00000050379	2020-09-06	-0.575366	0.306885	1.82547	0.176664	1
ENSMUSG00000061062	Gm10093	0.616442	1.81027	1.81895	0.177438	1
ENSMUSG00000035397	Klf16	-0.421892	1.80606	1.8187	0.177469	1
ENSMUSG00000035919	Bbs9	0.450393	1.53032	1.8184	0.177504	1
ENSMUSG00000109482	Gm4756	0.374481	5.84284	1.81783	0.177571	1
ENSMUSG00000096472	Cdkn2d	0.376292	1.50385	1.81743	0.17762	1
ENSMUSG00000049493	Pls1	0.614866	0.617163	1.81714	0.177654	1
ENSMUSG00000090659	Zfp493	-0.420567	0.568838	1.81573	0.177822	1
ENSMUSG00000022526	Zfp251	0.426229	0.441844	1.81409	0.178018	1
ENSMUSG00000040127	Sdr9c7	0.40028	5.64644	1.81227	0.178236	1
ENSMUSG00000052713	Zfp608	0.438109	0.768881	1.81099	0.178389	1
ENSMUSG00000017631	Abr	-0.353304	2.00821	1.80897	0.178631	1
ENSMUSG00000048490	Nrip1	0.290941	3.29299	1.80849	0.17869	1
ENSMUSG00000037406	Htra4	0.540753	0.386947	1.80601	0.178988	1
ENSMUSG00000025921	Rdh10	0.274862	4.48993	1.80565	0.179031	1
ENSMUSG00000039062	Anpep	0.312711	6.50023	1.80306	0.179343	1
ENSMUSG00000074896	Ifit3	-0.423824	3.62151	1.80241	0.179422	1
ENSMUSG00000038235	F11r	0.310239	5.7524	1.80051	0.179651	1
ENSMUSG00000106755	Tpi-rs11	0.399254	0.760941	1.8001	0.1797	1
ENSMUSG00000046079	Lrrc8d	0.318036	4.13826	1.79962	0.179758	1
ENSMUSG00000078851	H2aw	-0.612472	1.01803	1.79898	0.179836	1
ENSMUSG00000041420	Meis3	-0.464347	-0.185958	1.79864	0.179877	1
ENSMUSG00000002871	Tpra1	-0.318419	4.30388	1.7953	0.180281	1
ENSMUSG00000043953	Ccrl2	0.449173	0.385635	1.79398	0.180442	1
ENSMUSG00000083239	Mup-ps1	0.681201	0.0796901	1.79335	0.180518	1
ENSMUSG00000038244	Mical2	0.406935	2.97601	1.79027	0.180893	1
ENSMUSG00000090038	Gm16573	-0.362805	3.76883	1.78967	0.180966	1
ENSMUSG00000005225	Plekha8	0.26537	5.07589	1.78946	0.180992	1
ENSMUSG00000089712	Gm15889	-0.731438	1.93217	1.78718	0.181271	1
ENSMUSG00000038260	Trpm4	-0.558832	0.154713	1.78714	0.181275	1
ENSMUSG00000084013	Gm14270	-0.317522	3.77468	1.78695	0.181298	1
ENSMUSG00000033545	Znrf1	-0.450623	5.21364	1.78676	0.181322	1
ENSMUSG00000061242	Gm9104	-0.540205	1.01821	1.78504	0.181532	1
ENSMUSG00000031271	Serpina7	-0.4828	3.29729	1.78291	0.181792	1
ENSMUSG00000069011	Gm10254	0.47529	1.02379	1.78187	0.18192	1
ENSMUSG00000078674	Mup18	0.971448	8.65973	1.77967	0.18219	1
ENSMUSG00000031765	Mt1	-1.45665	6.355	1.77874	0.182304	1
ENSMUSG00000032724	Abtb2	0.406446	3.20274	1.77855	0.182327	1
ENSMUSG00000034675	Dbn1	-0.499393	0.289749	1.77797	0.182399	1
ENSMUSG00000073888	Ccl27a	-0.625073	2.30438	1.77761	0.182443	1
ENSMUSG00000037075	Rnf139	0.275499	5.292	1.77741	0.182468	1
ENSMUSG00000032827	Ppp1r9a	-0.302904	3.66543	1.7759	0.182654	1
ENSMUSG00000034636	Zyg11b	0.345604	5.24107	1.77546	0.182708	1
ENSMUSG00000085468	Gm15343	0.38462	1.62429	1.77269	0.18305	1
ENSMUSG00000056413	Adap1	0.428953	-0.16519	1.76776	0.18366	1
ENSMUSG00000040283	Btnl9	-0.453575	2.51832	1.76453	0.184061	1
ENSMUSG00000079334	Naa80	-0.447056	5.4796	1.76434	0.184084	1
ENSMUSG00000011148	Adssl1	0.377522	4.2099	1.76345	0.184194	1
ENSMUSG00000061848	Gm5805	-0.392543	2.05173	1.76105	0.184494	1
ENSMUSG00000084284	Tpt1-ps6	-0.540452	1.87504	1.76065	0.184543	1
ENSMUSG00000036916	Zfp280c	-0.306677	2.81232	1.75777	0.184903	1
ENSMUSG00000030223	Ptpro	0.524872	-0.517455	1.75764	0.18492	1
ENSMUSG00000038880	Mrps34	0.62822	2.13703	1.75683	0.18502	1
ENSMUSG00000047843	Bri3	-0.270966	4.77028	1.75646	0.185067	1
ENSMUSG00000029714	Gigyf1	-0.308815	4.8352	1.75639	0.185075	1
ENSMUSG00000057411	Fam173a	-0.261505	5.22177	1.75621	0.185098	1
ENSMUSG00000021259	Cyp46a1	0.440042	2.89998	1.75475	0.185281	1
ENSMUSG00000079481	Nhsl2	-0.460673	0.0737293	1.75444	0.185319	1
ENSMUSG00000030103	Bhlhe40	0.447185	6.68476	1.75287	0.185516	1
ENSMUSG00000106073	Gm42892	-0.436274	0.842119	1.75229	0.18559	1
ENSMUSG00000045594	Glb1	0.316456	3.70778	1.74719	0.18623	1
ENSMUSG00000001065	Zfp276	-0.341409	4.51948	1.74609	0.18637	1
ENSMUSG00000000555	Itga5	0.37059	4.2165	1.74428	0.186597	1
ENSMUSG00000072949	Acot1	-0.606882	4.17518	1.74272	0.186794	1
ENSMUSG00000035954	Dock4	0.3095	4.14921	1.73965	0.187183	1
ENSMUSG00000037348	Paqr7	0.329836	5.56552	1.73917	0.187244	1
ENSMUSG00000005982	Naa60	0.321868	5.95817	1.73591	0.187658	1
ENSMUSG00000026249	Serpine2	0.591567	3.65332	1.73517	0.187752	1
ENSMUSG00000000561	Wdr77	-0.265993	4.54278	1.73442	0.187848	1
ENSMUSG00000030340	Scnn1a	-0.340459	5.28056	1.73237	0.188108	1
ENSMUSG00000079243	Xirp1	0.801	0.585705	1.73209	0.188144	1
ENSMUSG00000021583	Erap1	0.364362	5.88059	1.73119	0.188259	1
ENSMUSG00000030945	Acsm2	0.681027	0.955052	1.73107	0.188274	1
ENSMUSG00000041293	Adgrf1	-0.899379	2.62552	1.731	0.188283	1
ENSMUSG00000037434	Slc30a1	0.265055	5.26945	1.73036	0.188365	1
ENSMUSG00000039901	Armh3	0.473066	2.31097	1.72868	0.18858	1
ENSMUSG00000022025	Cnmd	0.449624	3.29448	1.72841	0.188614	1
ENSMUSG00000054932	Afp	0.576432	1.91689	1.72757	0.188722	1
ENSMUSG00000097327	E030030I06Rik	-0.428261	1.23602	1.72707	0.188785	1
ENSMUSG00000015950	Ncf1	-0.417027	1.78618	1.72543	0.188996	1
ENSMUSG00000075268	Gm10819	0.44496	1.71133	1.7253	0.189012	1
ENSMUSG00000002416	Ndufb2	-0.328663	4.82727	1.72418	0.189156	1
ENSMUSG00000064254	Ethe1	0.35103	5.08389	1.72347	0.189248	1
ENSMUSG00000021774	Ube2e1	0.37411	3.58209	1.72194	0.189444	1
ENSMUSG00000064284	Cdpf1	-0.355387	1.84129	1.72086	0.189583	1
ENSMUSG00000079845	Xlr4a	1.52352	0.25727	1.72045	0.189635	1
ENSMUSG00000015094	Npdc1	-0.345919	1.90843	1.71684	0.190101	1
ENSMUSG00000024042	Sik1	0.486433	4.4173	1.71519	0.190313	1
ENSMUSG00000021866	Anxa11	0.362856	3.25392	1.71417	0.190446	1
ENSMUSG00000004552	Ctse	0.571848	3.48877	1.71361	0.190518	1
ENSMUSG00000030282	Cmas	0.313624	5.76788	1.71115	0.190836	1
ENSMUSG00000031788	Kifc3	0.449388	3.13701	1.71082	0.190879	1
ENSMUSG00000042680	Garem1	0.368323	3.45617	1.71057	0.190912	1
ENSMUSG00000021670	Hmgcr	0.479763	7.111	1.71054	0.190916	1
ENSMUSG00000071176	Arhgef10	-0.403376	0.946461	1.70942	0.191061	1
ENSMUSG00000079297	Gm2223	0.766907	1.84964	1.70868	0.191157	1
ENSMUSG00000026199	Ankzf1	-0.278639	4.63112	1.70673	0.191411	1
ENSMUSG00000021431	Snrnp48	-0.306226	3.84755	1.7059	0.191519	1
ENSMUSG00000013275	Slc41a1	0.36836	2.9075	1.70581	0.191529	1
ENSMUSG00000076614	Ighg1	1.2383	2.09641	1.70379	0.191794	1
ENSMUSG00000036934	4921524J17Rik	0.340868	2.86023	1.70363	0.191814	1
ENSMUSG00000021390	Ogn	-0.51452	0.615647	1.70292	0.191907	1
ENSMUSG00000020010	Vnn3	-0.337846	5.76648	1.70202	0.192024	1
ENSMUSG00000019590	Cyb561	0.510133	2.85572	1.70177	0.192056	1
ENSMUSG00000041012	Cmtm8	-0.307773	5.54924	1.701	0.192157	1
ENSMUSG00000026544	Dusp23	-0.305962	3.24729	1.69813	0.192532	1
ENSMUSG00000054720	Lrrc8c	-0.391405	1.89421	1.69713	0.192663	1
ENSMUSG00000097787	2700046G09Rik	-0.512283	0.0526594	1.69441	0.193021	1
ENSMUSG00000028689	Ccdc163	-0.435713	2.90333	1.6944	0.193022	1
ENSMUSG00000065979	Cpped1	0.287385	5.85984	1.69303	0.193202	1
ENSMUSG00000090516	Rps11-ps1	-0.578611	1.70082	1.693	0.193205	1
ENSMUSG00000046997	Spsb4	0.518958	1.12259	1.69258	0.193261	1
ENSMUSG00000026692	Fmo4	0.348011	3.8287	1.68872	0.19377	1
ENSMUSG00000043924	Ncmap	0.454263	1.46162	1.68659	0.194051	1
ENSMUSG00000064325	Hhip	0.455444	1.52855	1.68314	0.194508	1
ENSMUSG00000022528	Hes1	0.444827	3.21439	1.6816	0.194713	1
ENSMUSG00000047719	Ubiad1	-0.393726	3.61004	1.67963	0.194974	1
ENSMUSG00000031066	Usp11	-0.530365	0.174228	1.67962	0.194974	1
ENSMUSG00000001729	Akt1	0.355311	5.65659	1.67935	0.195011	1
ENSMUSG00000031502	Col4a1	-0.312075	4.1119	1.6767	0.195364	1
ENSMUSG00000028527	Ak4	0.467786	7.20027	1.67517	0.195567	1
ENSMUSG00000054942	Miga1	-0.42837	0.599801	1.67516	0.195569	1
ENSMUSG00000027331	Knstrn	0.662278	0.384296	1.67474	0.195625	1
ENSMUSG00000032727	Mier3	-0.281477	3.73011	1.6727	0.195898	1
ENSMUSG00000073758	Sh3d21	-0.46952	0.493382	1.6674	0.196607	1
ENSMUSG00000078672	Mup20	-0.563394	11.5196	1.66453	0.196993	1
ENSMUSG00000066595	Flvcr1	0.350538	2.06404	1.66448	0.197	1
ENSMUSG00000024180	Tmem8	0.31658	4.55225	1.6633	0.197159	1
ENSMUSG00000025076	Casp7	0.273806	4.76207	1.66292	0.19721	1
ENSMUSG00000000409	Lck	-0.431995	-0.120069	1.66259	0.197254	1
ENSMUSG00000020182	Ddc	0.507901	4.8944	1.65834	0.197828	1
ENSMUSG00000018819	Lsp1	-0.367234	1.38107	1.65722	0.19798	1
ENSMUSG00000042408	Zmym6	-0.308242	2.60143	1.65711	0.197994	1
ENSMUSG00000060260	Pwwp2b	0.409564	1.51811	1.65688	0.198025	1
ENSMUSG00000020544	Cox11	0.473989	1.22544	1.65648	0.198079	1
ENSMUSG00000021007	Spata7	-0.408775	0.566208	1.65352	0.198481	1
ENSMUSG00000027820	Mme	0.450312	5.59497	1.65227	0.19865	1
ENSMUSG00000021710	Nln	0.341407	4.6238	1.6511	0.198809	1
ENSMUSG00000030228	Pik3c2g	0.795321	3.9327	1.64983	0.198982	1
ENSMUSG00000032315	Cyp1a1	0.54965	0.946927	1.64619	0.199478	1
ENSMUSG00000052752	Traf7	-0.312539	4.18401	1.646	0.199505	1
ENSMUSG00000098050	Gm5345	0.489509	1.72825	1.64488	0.199657	1
ENSMUSG00000041736	Tspo	-0.2802	5.79276	1.64198	0.200054	1
ENSMUSG00000096674	Mup15	-0.693791	11.824	1.64029	0.200286	1
ENSMUSG00000020844	Nxn	-0.401242	0.944112	1.63931	0.200421	1
ENSMUSG00000061759	Armt1	0.276181	3.90489	1.6379	0.200614	1
ENSMUSG00000003355	Fkbp11	-0.575017	4.0723	1.63772	0.200639	1
ENSMUSG00000028121	Bcar3	0.331161	5.05783	1.63751	0.200667	1
ENSMUSG00000039156	Stim2	0.329258	4.76356	1.63675	0.200771	1
ENSMUSG00000078673	Mup19	-1.22143	8.17639	1.63387	0.201169	1
ENSMUSG00000051041	Olfml1	0.400691	3.9131	1.63198	0.20143	1
ENSMUSG00000060550	H2-Q7	-0.312598	6.11639	1.6298	0.20173	1
ENSMUSG00000082179	Gm11407	0.488795	1.56593	1.62943	0.201782	1
ENSMUSG00000087269	D330023K18Rik	-0.385292	0.811866	1.6275	0.202049	1
ENSMUSG00000045092	S1pr1	0.347335	5.44773	1.62742	0.202061	1
ENSMUSG00000038641	Akr1d1	0.430843	7.54644	1.62676	0.202151	1
ENSMUSG00000006705	Pknox1	0.270623	3.45718	1.62652	0.202185	1
ENSMUSG00000089698	Gm2541	0.494555	0.142003	1.62572	0.202297	1
ENSMUSG00000039652	Cpeb3	0.324761	2.9413	1.62546	0.202332	1
ENSMUSG00000027710	Acad9	0.420369	4.67093	1.62543	0.202337	1
ENSMUSG00000035759	Bbs10	-0.328207	2.47963	1.62527	0.202358	1
ENSMUSG00000020634	Ubxn2a	0.326042	3.77903	1.62254	0.202739	1
ENSMUSG00000039981	Zc3h12d	-0.519548	0.194475	1.62222	0.202782	1
ENSMUSG00000028713	Cyp4b1	-0.4498	3.91122	1.6193	0.20319	1
ENSMUSG00000039099	Wdr93	-0.631617	0.220859	1.6182	0.203344	1
ENSMUSG00000042246	Tmc7	-0.705139	2.18043	1.61607	0.20364	1
ENSMUSG00000030753	Thap12	0.310089	4.70333	1.61557	0.203711	1
ENSMUSG00000039458	Mtmr12	0.313311	2.74256	1.61478	0.203821	1
ENSMUSG00000047832	Cdca4	0.350114	1.70549	1.61469	0.203834	1
ENSMUSG00000027300	Ubox5	-0.315421	2.27983	1.61439	0.203876	1
ENSMUSG00000079494	Nat8f5	0.59492	3.53378	1.61414	0.20391	1
ENSMUSG00000090175	Ugt1a9	1.08792	6.41807	1.61309	0.204058	1
ENSMUSG00000030452	Nipa2	0.357393	3.45769	1.6125	0.204141	1
ENSMUSG00000030257	Srgap3	-0.43175	0.272915	1.61075	0.204386	1
ENSMUSG00000032846	Zswim6	-0.32873	1.84395	1.61	0.204492	1
ENSMUSG00000086213	A330040F15Rik	-0.581354	0.0124941	1.60934	0.204585	1
ENSMUSG00000006731	B4galnt1	-0.456598	5.40336	1.6074	0.204858	1
ENSMUSG00000050663	Trhde	0.673979	0.850757	1.60362	0.205391	1
ENSMUSG00000021068	Nin	-0.357086	1.40321	1.60361	0.205393	1
ENSMUSG00000074115	Saa1	1.49181	8.32189	1.60185	0.205641	1
ENSMUSG00000062515	Fabp4	-0.427216	2.96094	1.60168	0.205666	1
ENSMUSG00000083240	Gm13453	0.296593	3.2313	1.60139	0.205707	1
ENSMUSG00000022270	Retreg1	-0.3067	5.3065	1.60125	0.205727	1
ENSMUSG00000085151	1110018N20Rik	-0.634492	-0.200501	1.60016	0.20588	1
ENSMUSG00000030672	Mylpf	0.485643	0.0252148	1.5996	0.20596	1
ENSMUSG00000020846	Rflnb	-0.425693	-0.0798761	1.59869	0.206089	1
ENSMUSG00000082575	Eef2-ps2	0.509433	0.986591	1.59801	0.206186	1
ENSMUSG00000109473	B930025P03Rik	-1.27505	1.13303	1.59501	0.206611	1
ENSMUSG00000023274	Cd4	-0.510151	0.40861	1.59408	0.206744	1
ENSMUSG00000056025	Clca3a1	-0.35787	2.5977	1.59302	0.206895	1
ENSMUSG00000021012	Zc3h14	0.312157	5.02129	1.59246	0.206975	1
ENSMUSG00000026430	Rassf5	0.327466	3.1484	1.59237	0.206988	1
ENSMUSG00000078612	Fyb2	0.366995	2.36663	1.59144	0.20712	1
ENSMUSG00000005774	Rfx5	0.31945	2.7065	1.58764	0.207664	1
ENSMUSG00000027173	Depdc7	0.274093	5.17873	1.58725	0.207719	1
ENSMUSG00000040795	Iqcc	0.314942	3.06356	1.5868	0.207783	1
ENSMUSG00000063727	Tnfrsf11b	0.458443	1.54568	1.58625	0.207863	1
ENSMUSG00000004071	Cdip1	-0.372493	6.42468	1.58535	0.207992	1
ENSMUSG00000041879	Ipo9	0.28529	4.58031	1.58409	0.208173	1
ENSMUSG00000047787	Flrt1	0.45245	0.37002	1.57957	0.208822	1
ENSMUSG00000038175	Mylip	-0.43783	2.80641	1.57843	0.208987	1
ENSMUSG00000044676	Zfp612	-0.311553	3.68913	1.57724	0.209159	1
ENSMUSG00000004814	Ccl24	-0.384783	1.22021	1.57675	0.209229	1
ENSMUSG00000041075	Fzd7	0.381069	4.00402	1.57591	0.20935	1
ENSMUSG00000042286	Stab1	-0.361952	5.3375	1.57324	0.209738	1
ENSMUSG00000032788	Pdxk	0.299864	6.11964	1.57318	0.209746	1
ENSMUSG00000020385	Clk4	-0.346789	6.00728	1.57146	0.209996	1
ENSMUSG00000026511	Srp9	-0.336007	6.20614	1.57025	0.210171	1
ENSMUSG00000013076	Amotl1	-0.313838	2.72764	1.56831	0.210453	1
ENSMUSG00000027074	Slc43a3	-0.294878	4.80315	1.56795	0.210505	1
ENSMUSG00000082674	Gm11914	0.560013	0.739405	1.56725	0.210606	1
ENSMUSG00000018593	Sparc	-0.265396	5.4128	1.56677	0.210677	1
ENSMUSG00000026578	Ccdc181	-0.334852	1.53872	1.56427	0.211041	1
ENSMUSG00000024855	Pacs1	-0.416125	1.20612	1.5627	0.211271	1
ENSMUSG00000097357	Gm16793	0.600212	0.797644	1.56238	0.211317	1
ENSMUSG00000023960	Enpp5	0.346497	4.39277	1.56042	0.211604	1
ENSMUSG00000025602	Zfp202	-0.548628	-0.229482	1.55995	0.211673	1
ENSMUSG00000102190	Gm38166	-0.437863	1.16119	1.55823	0.211924	1
ENSMUSG00000021458	Aopep	-0.345822	4.9251	1.5581	0.211944	1
ENSMUSG00000012017	Scarf2	-0.401512	1.52821	1.55749	0.212034	1
ENSMUSG00000034820	Cpsf7	-0.325923	5.05482	1.55729	0.212062	1
ENSMUSG00000035901	Dennd5a	0.258396	4.57925	1.55689	0.212121	1
ENSMUSG00000108350	Gm44950	-0.367601	1.13724	1.5562	0.212222	1
ENSMUSG00000023206	Il15ra	-0.324971	5.68661	1.55609	0.212238	1
ENSMUSG00000035235	Trim13	0.39238	1.323	1.55602	0.212248	1
ENSMUSG00000028619	Tceanc2	-0.335077	3.07731	1.55507	0.212389	1
ENSMUSG00000021135	Slc10a1	0.343394	9.63889	1.55466	0.212449	1
ENSMUSG00000058443	Rpl10-ps3	-0.615421	1.87736	1.55386	0.212567	1
ENSMUSG00000027186	Elf5	0.81003	0.161958	1.55334	0.212644	1
ENSMUSG00000032773	Chrm1	0.78369	-0.100925	1.55247	0.212771	1
ENSMUSG00000024045	Akap8	-0.293888	5.8176	1.54948	0.213212	1
ENSMUSG00000028414	Fktn	0.331959	3.1916	1.5491	0.213268	1
ENSMUSG00000015377	Dennd6b	-0.339598	3.07605	1.5491	0.213269	1
ENSMUSG00000100975	Gm28875	-0.466964	0.821607	1.5477	0.213476	1
ENSMUSG00000030929	Eri2	-0.378461	2.42734	1.54761	0.213489	1
ENSMUSG00000020601	Trib2	-0.446335	1.2377	1.54669	0.213625	1
ENSMUSG00000026473	Glul	-0.332649	9.46081	1.54632	0.21368	1
ENSMUSG00000029122	Evc	0.389737	1.36222	1.54508	0.213864	1
ENSMUSG00000029859	Epha1	0.254781	5.16105	1.54422	0.21399	1
ENSMUSG00000073434	Wdr90	-0.319965	2.54113	1.54229	0.214277	1
ENSMUSG00000020070	Rufy2	0.302562	2.54266	1.539	0.214766	1
ENSMUSG00000072664	Ugt3a1	0.542761	5.35886	1.53819	0.214888	1
ENSMUSG00000093606	B130034C11Rik	-0.388134	0.0308123	1.53805	0.214908	1
ENSMUSG00000056412	Psenen-ps	-0.326033	3.42258	1.53741	0.215004	1
ENSMUSG00000034932	Mrpl54	-0.332176	4.20429	1.5342	0.215483	1
ENSMUSG00000102644	Thap6	-0.392192	2.33561	1.53387	0.215533	1
ENSMUSG00000067813	Xkr9	0.304899	4.2404	1.53204	0.215807	1
ENSMUSG00000009376	Met	0.298378	6.03566	1.53168	0.21586	1
ENSMUSG00000020709	Adap2	0.3252	3.96999	1.52959	0.216173	1
ENSMUSG00000074269	Rec114	0.935095	-0.108552	1.52948	0.216191	1
ENSMUSG00000084788	Gm11342	0.517222	0.159816	1.52917	0.216237	1
ENSMUSG00000017978	Cadps2	0.31646	3.87161	1.52739	0.216504	1
ENSMUSG00000025317	Car5a	0.461904	5.45893	1.52629	0.21667	1
ENSMUSG00000024561	Mbd1	-0.316367	4.55721	1.52586	0.216735	1
ENSMUSG00000028032	Papss1	-0.605348	2.63468	1.52454	0.216934	1
ENSMUSG00000086502	B130055M24Rik	-0.434819	-0.121986	1.52367	0.217065	1
ENSMUSG00000008845	Cd163	-0.351387	3.88794	1.52323	0.217132	1
ENSMUSG00000099478	Gm28370	-0.35038	2.16772	1.52161	0.217376	1
ENSMUSG00000029381	Shroom3	0.414897	2.45423	1.52139	0.217409	1
ENSMUSG00000005682	Pan2	-0.295453	5.20884	1.52102	0.217465	1
ENSMUSG00000034751	Mast4	0.382154	1.4677	1.52101	0.217467	1
ENSMUSG00000009418	Nav1	-0.389133	2.06518	1.52066	0.21752	1
ENSMUSG00000027082	Tfpi	-0.471856	2.69317	1.51963	0.217675	1
ENSMUSG00000099342	Gm18180	0.448119	0.376824	1.51914	0.21775	1
ENSMUSG00000072258	Taf1a	-0.287027	2.86935	1.51862	0.217829	1
ENSMUSG00000022000	Zc3h13	-0.274326	4.16164	1.51697	0.218078	1
ENSMUSG00000092203	1110038B12Rik	-0.3465	3.81966	1.51689	0.218091	1
ENSMUSG00000025395	Prim1	-0.497975	1.3266	1.5162	0.218196	1
ENSMUSG00000024654	Asrgl1	0.318269	3.95779	1.51498	0.21838	1
ENSMUSG00000026893	Gca	0.420681	2.2621	1.51227	0.218794	1
ENSMUSG00000086968	4933431E20Rik	0.447978	0.968573	1.51057	0.219051	1
ENSMUSG00000019467	Arhgef25	-0.396545	0.998659	1.50968	0.219188	1
ENSMUSG00000054509	Parp4	-0.279489	3.74063	1.50877	0.219327	1
ENSMUSG00000028354	Fmn2	0.891786	-0.869902	1.50876	0.219329	1
ENSMUSG00000029370	Rassf6	0.318984	3.63521	1.50809	0.21943	1
ENSMUSG00000026208	Des	-0.477681	1.64869	1.50791	0.219458	1
ENSMUSG00000027620	Rbm39	-0.315714	7.01924	1.50774	0.219485	1
ENSMUSG00000035780	Ugt2a3	0.327741	8.45363	1.50767	0.219494	1
ENSMUSG00000000142	Axin2	-0.400537	2.05266	1.50671	0.219641	1
ENSMUSG00000019055	Plod1	0.275732	5.31526	1.50633	0.219701	1
ENSMUSG00000056666	Retsat	0.356523	7.64496	1.50581	0.219779	1
ENSMUSG00000107552	Gm44096	-0.417124	0.878181	1.50569	0.219798	1
ENSMUSG00000054823	Nsd3	-0.350482	6.2297	1.50493	0.219915	1
ENSMUSG00000076612	Ighg2c	-1.19148	0.743381	1.50413	0.220036	1
ENSMUSG00000019295	Tmem129	0.245361	4.59418	1.50295	0.220217	1
ENSMUSG00000021706	Zfyve16	0.315685	2.78154	1.50254	0.220281	1
ENSMUSG00000059981	Taok2	-0.235436	5.62154	1.50142	0.220453	1
ENSMUSG00000023262	Acy1	0.333909	5.98461	1.49936	0.22077	1
ENSMUSG00000052395	Rft1	0.298509	3.64601	1.49819	0.22095	1
ENSMUSG00000066829	Zfp810	0.426605	2.63203	1.49705	0.221125	1
ENSMUSG00000039865	Slc44a3	0.3463	2.71064	1.49644	0.22122	1
ENSMUSG00000093610	Cyp2c53-ps	1.0998	0.0675613	1.49188	0.221926	1
ENSMUSG00000066684	Pilrb1	-0.40038	1.46962	1.49165	0.221961	1
ENSMUSG00000044991	Shld1	-0.354155	2.88012	1.49028	0.222173	1
ENSMUSG00000054237	Fra10ac1	-0.276954	3.6124	1.49003	0.222211	1
ENSMUSG00000019373	Cops3	0.333623	4.90535	1.48988	0.222235	1
ENSMUSG00000085471	4933423P22Rik	0.439413	-0.153712	1.48914	0.22235	1
ENSMUSG00000029403	Cdkl2	0.343778	2.49539	1.48893	0.222383	1
ENSMUSG00000014550	Rbsn	0.29288	3.37303	1.4881	0.222512	1
ENSMUSG00000015337	Endog	0.308884	3.71896	1.48765	0.222582	1
ENSMUSG00000040883	Tmem205	-0.287888	8.97755	1.48377	0.223185	1
ENSMUSG00000106538	Gm30301	0.435562	0.872873	1.48304	0.223299	1
ENSMUSG00000025558	Dock9	0.287751	3.94872	1.48045	0.223704	1
ENSMUSG00000101586	Gm29017	0.593347	0.60957	1.47894	0.22394	1
ENSMUSG00000097639	Platr4	0.476472	-0.0136327	1.47881	0.223962	1
ENSMUSG00000066892	Fbxl12	-0.384464	2.97036	1.47646	0.22433	1
ENSMUSG00000062480	Acat3	0.281284	7.00476	1.47186	0.225053	1
ENSMUSG00000025545	Clybl	0.228124	5.19502	1.4718	0.225062	1
ENSMUSG00000040323	Gm15429	0.42522	3.04877	1.46885	0.225528	1
ENSMUSG00000035936	Aldh5a1	0.268985	5.6309	1.46639	0.225916	1
ENSMUSG00000023052	Npff	-0.43351	0.253707	1.46636	0.22592	1
ENSMUSG00000022477	Aco2	0.315837	7.55056	1.46553	0.226052	1
ENSMUSG00000042743	Sgtb	0.478758	1.02231	1.46468	0.226187	1
ENSMUSG00000108822	Gm44787	-0.581743	1.19819	1.46211	0.226595	1
ENSMUSG00000037845	Fdxacb1	-0.371119	1.67668	1.45965	0.226985	1
ENSMUSG00000018669	Cdk5rap3	-0.275958	6.08539	1.45481	0.227757	1
ENSMUSG00000060419	Rps16-ps2	-0.332093	5.4373	1.45442	0.22782	1
ENSMUSG00000034066	Farp2	0.466459	3.18528	1.454	0.227888	1
ENSMUSG00000005718	Tfap4	-0.381198	1.88367	1.4532	0.228015	1
ENSMUSG00000000881	Dlg3	0.241395	3.81193	1.45307	0.228037	1
ENSMUSG00000038417	Fig4	0.330009	3.67823	1.45186	0.228229	1
ENSMUSG00000110185	Igip	-0.335402	3.37616	1.44986	0.228551	1
ENSMUSG00000047003	Zfp41	0.429337	0.446881	1.44901	0.228687	1
ENSMUSG00000022223	Sdr39u1	-0.266837	4.34563	1.44901	0.228687	1
ENSMUSG00000104445	Rhbg	-0.388299	1.6061	1.44879	0.228722	1
ENSMUSG00000091695	Gm17669	-0.529765	3.43413	1.44835	0.228792	1
ENSMUSG00000000915	Hip1r	-0.352743	4.81157	1.44663	0.229069	1
ENSMUSG00000048728	Zfp454	0.456349	0.0687472	1.44629	0.229125	1
ENSMUSG00000072893	4933439C10Rik	-0.417208	2.56573	1.44573	0.229214	1
ENSMUSG00000083621	Gm14586	-0.319551	3.39827	1.44552	0.229249	1
ENSMUSG00000026785	Pkn3	-0.35915	0.603732	1.44476	0.229371	1
ENSMUSG00000056124	B4galt6	-0.390337	0.515871	1.44375	0.229534	1
ENSMUSG00000015711	Prune1	0.308904	3.24765	1.44272	0.2297	1
ENSMUSG00000062937	Mtap	0.285201	3.95323	1.44247	0.22974	1
ENSMUSG00000022228	Zscan26	-0.311018	5.72157	1.44222	0.229781	1
ENSMUSG00000026773	Pfkfb3	-0.503016	4.29017	1.44058	0.230045	1
ENSMUSG00000020143	Dock2	-0.378883	0.825741	1.43873	0.230345	1
ENSMUSG00000041231	Ublcp1	0.231514	4.80197	1.43824	0.230424	1
ENSMUSG00000103921	Gm5841	-0.433134	0.601463	1.43781	0.230493	1
ENSMUSG00000075703	Selenoi	0.277905	5.32263	1.43775	0.230503	1
ENSMUSG00000050592	Fam78a	-0.400898	-0.164987	1.43713	0.230604	1
ENSMUSG00000021650	Ptcd2	0.244252	4.82647	1.43484	0.230976	1
ENSMUSG00000040482	Dxo	-0.329888	4.34375	1.43474	0.230993	1
ENSMUSG00000010936	Vac14	0.306384	4.75727	1.43352	0.231191	1
ENSMUSG00000048376	F2r	-0.324124	4.2964	1.43329	0.231228	1
ENSMUSG00000013701	Timm23	0.275223	4.92263	1.43198	0.231441	1
ENSMUSG00000000295	Hddc2	0.411156	0.425926	1.43165	0.231496	1
ENSMUSG00000104950	4833413G10Rik	-0.376075	1.25187	1.43123	0.231564	1
ENSMUSG00000051435	Fhad1	-0.574789	1.82713	1.43101	0.231599	1
ENSMUSG00000108425	Gm44706	-0.508441	1.91816	1.43076	0.231641	1
ENSMUSG00000028601	Echdc2	-0.457465	7.82878	1.4307	0.231651	1
ENSMUSG00000019066	Rab3d	0.330226	3.09872	1.43058	0.23167	1
ENSMUSG00000052837	Junb	0.502778	4.22651	1.43051	0.231681	1
ENSMUSG00000029096	Htra3	-0.644548	0.251062	1.42995	0.231773	1
ENSMUSG00000081251	Gm12164	0.461511	0.051205	1.42918	0.231899	1
ENSMUSG00000068758	Il3ra	-0.414355	0.75527	1.42912	0.231908	1
ENSMUSG00000078122	F630028O10Rik	-0.452252	0.655359	1.42885	0.231952	1
ENSMUSG00000061689	Dlgap4	-0.341492	4.07852	1.42679	0.23229	1
ENSMUSG00000030232	Aebp2	-0.248464	4.13715	1.42524	0.232543	1
ENSMUSG00000020300	Cpeb4	0.321992	4.92654	1.4241	0.232729	1
ENSMUSG00000043263	Ifi209	-0.445972	0.743419	1.42224	0.233035	1
ENSMUSG00000038764	Ptpn3	0.244173	4.92965	1.42192	0.233088	1
ENSMUSG00000063684	Gm13910	0.267697	4.28513	1.42182	0.233104	1
ENSMUSG00000047037	Nipa1	0.462522	0.139201	1.42124	0.2332	1
ENSMUSG00000052934	Fbxo31	-0.467926	5.17779	1.41924	0.233528	1
ENSMUSG00000035284	Vps13c	0.314522	4.70486	1.41871	0.233617	1
ENSMUSG00000024697	Gna14	0.576745	3.58429	1.41779	0.233768	1
ENSMUSG00000071633	Gm4952	-0.402745	5.56052	1.41736	0.233838	1
ENSMUSG00000024421	Lama3	0.390247	2.73362	1.417	0.233898	1
ENSMUSG00000002847	Pla1a	0.242815	5.73506	1.41678	0.233933	1
ENSMUSG00000057842	Zfp595	-0.302843	2.8814	1.41591	0.234079	1
ENSMUSG00000018340	Anxa6	0.31678	6.61653	1.4156	0.234129	1
ENSMUSG00000085599	Gm13449	0.558483	0.709088	1.41486	0.234252	1
ENSMUSG00000008668	Rps18	-0.344684	8.3952	1.41458	0.234298	1
ENSMUSG00000005057	Sh2b2	-0.445929	1.3277	1.41421	0.234359	1
ENSMUSG00000021819	Zswim8	-0.287496	5.27581	1.41256	0.234632	1
ENSMUSG00000024309	Pfdn6	-0.312267	4.95334	1.41234	0.234668	1
ENSMUSG00000013539	Tango2	-0.311358	5.3635	1.41233	0.23467	1
ENSMUSG00000020592	Sdc1	0.410194	7.47473	1.41163	0.234786	1
ENSMUSG00000048332	Lhfp	-0.285742	3.10669	1.41149	0.234809	1
ENSMUSG00000039199	Zdhhc1	-0.396342	1.71198	1.4109	0.234907	1
ENSMUSG00000036098	Myrf	0.294075	4.53984	1.41086	0.234913	1
ENSMUSG00000032997	Chpf	-0.401534	0.907142	1.41059	0.234959	1
ENSMUSG00000024948	Map4k2	-0.304732	4.06004	1.40955	0.23513	1
ENSMUSG00000032652	Crebl2	0.383089	5.81285	1.40788	0.235408	1
ENSMUSG00000052760	A630001G21Rik	-0.354963	0.230759	1.40757	0.235461	1
ENSMUSG00000001942	Siae	0.356227	4.76432	1.40731	0.235504	1
ENSMUSG00000063445	Nmral1	-0.460025	2.4426	1.40702	0.235552	1
ENSMUSG00000040061	Plcb2	-0.450186	0.950446	1.40509	0.235874	1
ENSMUSG00000050628	Ubald2	-0.304539	4.25762	1.40489	0.235906	1
ENSMUSG00000028656	Cap1	0.243594	5.76601	1.40483	0.235916	1
ENSMUSG00000031299	Pdha1	0.321338	6.23095	1.40418	0.236025	1
ENSMUSG00000039158	Akna	-0.336609	1.05675	1.40318	0.236192	1
ENSMUSG00000073409	H2-Q6	-0.316596	5.1368	1.40305	0.236214	1
ENSMUSG00000000340	Dbt	0.306359	6.04193	1.40234	0.236332	1
ENSMUSG00000029299	Abcg3	-0.321693	1.48358	1.40105	0.236548	1
ENSMUSG00000050234	Gja4	-0.466575	2.19391	1.4008	0.23659	1
ENSMUSG00000026659	Dusp12	-0.309311	3.40963	1.39737	0.237165	1
ENSMUSG00000106926	Rpl7-ps7	-0.332339	3.30809	1.39575	0.237436	1
ENSMUSG00000054008	Ndst1	0.538284	5.5177	1.3946	0.23763	1
ENSMUSG00000066842	Hmcn1	-0.358548	0.953651	1.39442	0.23766	1
ENSMUSG00000021959	Lats2	-0.251048	3.70003	1.3944	0.237663	1
ENSMUSG00000021701	Plk2	0.30985	3.57626	1.39422	0.237695	1
ENSMUSG00000030359	Pzp	0.342052	11.7878	1.3942	0.237698	1
ENSMUSG00000070282	3000002C10Rik	-0.455434	0.989645	1.39369	0.237783	1
ENSMUSG00000041037	Irgq	0.298989	3.82861	1.39163	0.238131	1
ENSMUSG00000024812	Tjp2	0.315435	3.33507	1.39145	0.238161	1
ENSMUSG00000039357	Fut11	-0.333009	2.88781	1.3911	0.23822	1
ENSMUSG00000022425	Enpp2	-0.303035	5.68248	1.39104	0.23823	1
ENSMUSG00000026319	Relch	-0.238896	4.16032	1.39029	0.238357	1
ENSMUSG00000022807	Osbpl11	0.260222	3.80602	1.38999	0.238406	1
ENSMUSG00000064367	mt-Nd5	0.386292	11.3056	1.38824	0.238702	1
ENSMUSG00000064493	Snora28	0.462306	-0.118783	1.38784	0.238771	1
ENSMUSG00000033557	Fam20b	0.314451	3.90483	1.38782	0.238774	1
ENSMUSG00000044641	Pard6b	0.355164	1.71771	1.38736	0.238851	1
ENSMUSG00000075279	Mrpl23-ps1	-0.308889	3.09622	1.38707	0.2389	1
ENSMUSG00000038894	Irs2	-0.544706	3.75452	1.38614	0.239058	1
ENSMUSG00000024909	Efemp2	-0.349284	1.71453	1.3834	0.239522	1
ENSMUSG00000006262	Mob1b	0.329999	5.15719	1.38332	0.239536	1
ENSMUSG00000056673	Kdm5d	2.2141	3.12683	1.38171	0.239811	1
ENSMUSG00000056211	R3hdm1	-0.235239	4.60368	1.38165	0.23982	1
ENSMUSG00000084235	Gm15421	-0.430335	0.813194	1.38018	0.24007	1
ENSMUSG00000028214	Gem	-0.416628	0.332273	1.37988	0.240122	1
ENSMUSG00000024127	Prepl	0.301207	4.20014	1.3787	0.240323	1
ENSMUSG00000067736	Gm10222	0.413395	0.298675	1.3764	0.240716	1
ENSMUSG00000037172	E330009J07Rik	0.337409	3.36388	1.37634	0.240726	1
ENSMUSG00000025726	Slc28a1	0.599701	-0.391957	1.37611	0.240765	1
ENSMUSG00000062110	Scfd2	-0.303539	2.81869	1.37467	0.241011	1
ENSMUSG00000014077	Chp1	-0.513661	7.49453	1.37458	0.241027	1
ENSMUSG00000020160	Meis1	0.381672	1.45515	1.37419	0.241093	1
ENSMUSG00000031503	Col4a2	-0.277936	3.7698	1.37331	0.241243	1
ENSMUSG00000075266	Cenpw	-0.476079	0.665751	1.37306	0.241286	1
ENSMUSG00000054843	Atrnl1	0.279875	4.39687	1.37241	0.241398	1
ENSMUSG00000038215	Cep44	-0.261333	3.30767	1.37228	0.241421	1
ENSMUSG00000022816	Fstl1	-0.340858	2.22711	1.37088	0.241661	1
ENSMUSG00000108022	Gm7298	-0.486842	0.792959	1.37015	0.241787	1
ENSMUSG00000054814	Usp46	0.323844	3.42321	1.36982	0.241843	1
ENSMUSG00000049751	Rpl36al	-0.272984	6.66536	1.36946	0.241905	1
ENSMUSG00000045790	Ccdc149	-0.734955	1.69407	1.36932	0.241929	1
ENSMUSG00000068083	Cyp2d40	0.396913	6.27181	1.36922	0.241946	1
ENSMUSG00000029817	Tra2a	-0.351415	4.6192	1.36858	0.242056	1
ENSMUSG00000002475	Abhd3	0.291291	5.5054	1.3672	0.242294	1
ENSMUSG00000005628	Tmod4	-0.631256	0.78745	1.3671	0.242311	1
ENSMUSG00000024827	Gldc	0.324648	6.14979	1.36668	0.242384	1
ENSMUSG00000040966	Slc22a2	0.602254	1.01863	1.36479	0.242709	1
ENSMUSG00000033632	AW554918	-0.328336	1.21127	1.36434	0.242787	1
ENSMUSG00000074336	Apoc4	-0.315435	9.55332	1.36285	0.243044	1
ENSMUSG00000035372	1810055G02Rik	-0.492835	4.57943	1.36267	0.243074	1
ENSMUSG00000030670	Cyp2r1	0.303557	3.95498	1.36247	0.243109	1
ENSMUSG00000096401	Gm21811	-0.415908	0.541944	1.36215	0.243166	1
ENSMUSG00000055818	A230083G16Rik	0.407636	1.51052	1.36131	0.243311	1
ENSMUSG00000028988	Ctnnbip1	0.330539	2.65679	1.36084	0.243391	1
ENSMUSG00000038539	Atf5	-0.423159	6.83397	1.3605	0.243451	1
ENSMUSG00000027255	Arfgap2	0.371183	5.28029	1.36016	0.24351	1
ENSMUSG00000022836	Mylk	-0.303312	6.42492	1.35805	0.243875	1
ENSMUSG00000028703	Lrrc41	0.522003	3.0178	1.35664	0.244121	1
ENSMUSG00000017843	Ppp2r5c	0.232338	4.99559	1.35513	0.244383	1
ENSMUSG00000039960	Rhou	0.276512	5.46934	1.35379	0.244616	1
ENSMUSG00000000486	2020-09-01	-0.40677	0.687257	1.35255	0.244834	1
ENSMUSG00000030512	Snrpa1	-0.238209	4.08199	1.35189	0.244949	1
ENSMUSG00000071141	Rpl36a-ps3	-0.278615	6.08968	1.35176	0.244971	1
ENSMUSG00000029439	Sfswap	-0.294143	4.5001	1.35148	0.24502	1
ENSMUSG00000060012	Kif13b	0.341332	3.65938	1.35005	0.245269	1
ENSMUSG00000032599	Ip6k2	-0.332133	5.04387	1.34975	0.245321	1
ENSMUSG00000026447	Pik3c2b	-0.524658	2.27349	1.34952	0.245362	1
ENSMUSG00000026869	Psmd5	0.307616	5.12788	1.3491	0.245436	1
ENSMUSG00000022579	Gpihbp1	-0.25419	4.11523	1.34863	0.245518	1
ENSMUSG00000097729	2310015A10Rik	-0.31763	1.94547	1.34814	0.245603	1
ENSMUSG00000025888	Casp1	-0.439191	1.28641	1.3473	0.245751	1
ENSMUSG00000005882	Uqcc1	0.234323	5.18952	1.34518	0.246122	1
ENSMUSG00000046603	Tcaim	0.291846	4.27662	1.34472	0.246204	1
ENSMUSG00000032449	Slc25a36	-0.29011	2.28237	1.34436	0.246266	1
ENSMUSG00000002346	Slc25a42	-0.266949	6.17305	1.34364	0.246394	1
ENSMUSG00000048732	Klhl11	0.400883	0.11032	1.34359	0.246403	1
ENSMUSG00000007216	Zfp775	-0.421416	0.828941	1.34299	0.246508	1
ENSMUSG00000038370	Pcp4l1	0.561229	4.21981	1.34205	0.246672	1
ENSMUSG00000037148	Arhgap10	0.486368	0.992389	1.34142	0.246785	1
ENSMUSG00000043162	Pyurf	0.25892	3.9665	1.34063	0.246922	1
ENSMUSG00000020432	Tcn2	0.306549	7.0246	1.34043	0.246958	1
ENSMUSG00000070372	Capza1	0.298039	3.82836	1.33968	0.24709	1
ENSMUSG00000058317	Ube2e2	-0.243535	3.78726	1.33955	0.247114	1
ENSMUSG00000010601	Apol7a	0.34421	7.28962	1.3394	0.247141	1
ENSMUSG00000041750	Cd1d2	0.281145	3.54154	1.33889	0.247229	1
ENSMUSG00000037548	H2-DMb2	-0.405983	-0.473362	1.33851	0.247297	1
ENSMUSG00000058900	Rsl1	0.346109	0.709288	1.33828	0.247338	1
ENSMUSG00000026245	Farsb	0.304633	5.07315	1.33761	0.247457	1
ENSMUSG00000044792	Isca1	0.251343	5.31805	1.33745	0.247484	1
ENSMUSG00000033124	Atg9a	0.420326	4.13376	1.33634	0.247681	1
ENSMUSG00000022679	Mpv17l	0.32041	4.60936	1.33488	0.247938	1
ENSMUSG00000093458	Gm20688	0.526943	-0.0105263	1.3345	0.248006	1
ENSMUSG00000024246	Thumpd2	0.320125	1.27173	1.33405	0.248086	1
ENSMUSG00000101970	1810026B05Rik	-0.281639	3.38554	1.33277	0.248313	1
ENSMUSG00000074794	Arrdc3	-0.657765	7.19444	1.33192	0.248464	1
ENSMUSG00000022325	Pop1	0.279808	2.70531	1.33183	0.248479	1
ENSMUSG00000034487	Poglut3	0.268864	2.96378	1.33153	0.248534	1
ENSMUSG00000108342	Gm29920	-0.461233	0.544069	1.3315	0.248538	1
ENSMUSG00000063760	Rnf217	-0.299129	4.5264	1.33069	0.248682	1
ENSMUSG00000027313	Chac1	-0.916514	1.66441	1.33037	0.248739	1
ENSMUSG00000039191	Rbpj	0.286385	3.58557	1.32974	0.248851	1
ENSMUSG00000001909	Trmt1	-0.30128	4.94307	1.32596	0.249526	1
ENSMUSG00000031072	LTO1	-0.233914	3.88908	1.32404	0.249868	1
ENSMUSG00000038335	Tsr1	0.311626	3.47548	1.32384	0.249904	1
ENSMUSG00000022893	Adamts1	-0.348299	2.65842	1.32348	0.249969	1
ENSMUSG00000087305	A430035B10Rik	-0.419462	0.0697073	1.32305	0.250045	1
ENSMUSG00000017667	Zfp334	-0.354246	0.618835	1.32302	0.250051	1
ENSMUSG00000087354	4930404I05Rik	-0.470737	0.273192	1.32017	0.250561	1
ENSMUSG00000051238	Swsap1	0.295705	2.37874	1.31993	0.250605	1
ENSMUSG00000060519	Tor3a	0.356105	2.36242	1.3194	0.2507	1
ENSMUSG00000025223	Ldb1	-0.35169	5.10281	1.31877	0.250813	1
ENSMUSG00000026649	Cfap126	-0.527807	0.512244	1.31854	0.250854	1
ENSMUSG00000035944	Ttc38	-0.259986	5.71696	1.31839	0.250881	1
ENSMUSG00000047238	Mageh1	-0.364419	1.1628	1.31829	0.2509	1
ENSMUSG00000040738	Ints8	0.249789	4.11794	1.31782	0.250983	1
ENSMUSG00000057465	Saa2	1.4848	7.24345	1.31779	0.250989	1
ENSMUSG00000005338	Cadm3	-0.282244	2.39425	1.31772	0.251002	1
ENSMUSG00000035875	AI182371	0.346488	7.60968	1.31665	0.251195	1
ENSMUSG00000026399	Cd55	-0.24807	3.77853	1.31593	0.251323	1
ENSMUSG00000058230	Arhgap35	0.292257	5.9653	1.31444	0.251592	1
ENSMUSG00000022353	Mtss1	-0.27427	7.94387	1.31339	0.251781	1
ENSMUSG00000020850	Prpf8	0.300276	7.17446	1.31334	0.25179	1
ENSMUSG00000086219	Srrm4os	-0.429501	0.0807566	1.3129	0.251869	1
ENSMUSG00000021495	Fam193b	-0.407628	6.27116	1.31284	0.251881	1
ENSMUSG00000070972	Dnajc25	-0.234141	4.62603	1.31244	0.251953	1
ENSMUSG00000063171	Rps4l	-0.434675	3.38186	1.31186	0.252059	1
ENSMUSG00000041596	Nlrp5-ps	-0.553226	0.225145	1.31177	0.252074	1
ENSMUSG00000033439	Trmt13	-0.32092	1.64142	1.31106	0.252204	1
ENSMUSG00000080776	Gm12174	-0.3024	4.63692	1.31099	0.252216	1
ENSMUSG00000032377	Plscr4	-0.351565	2.05739	1.31008	0.252381	1
ENSMUSG00000027387	Zc3h8	-0.285944	2.73917	1.30918	0.252543	1
ENSMUSG00000021208	Ifi27l2b	-0.522342	1.93847	1.30877	0.252618	1
ENSMUSG00000036533	Cdc42ep3	-0.455004	0.229732	1.30827	0.252707	1
ENSMUSG00000022540	Rogdi	-0.278277	3.46176	1.30797	0.252762	1
ENSMUSG00000006390	Elovl1	0.308869	5.16059	1.30791	0.252773	1
ENSMUSG00000022219	Cideb	0.277052	5.31137	1.30748	0.252851	1
ENSMUSG00000040661	Rad54l2	-0.241117	5.02222	1.30736	0.252874	1
ENSMUSG00000029762	Akr1b8	-0.447377	2.211	1.30725	0.252893	1
ENSMUSG00000033209	Ttc28	0.380036	0.301671	1.30702	0.252936	1
ENSMUSG00000010097	Nxf1	-0.280131	6.552	1.30693	0.252952	1
ENSMUSG00000026600	Soat1	-0.29324	2.12636	1.30656	0.253019	1
ENSMUSG00000034947	Tmem106a	-0.25041	3.62912	1.30511	0.253282	1
ENSMUSG00000097785	B230217O12Rik	-0.495345	0.835253	1.30283	0.253698	1
ENSMUSG00000078942	Naip6	-0.451897	0.647683	1.30234	0.253786	1
ENSMUSG00000043872	Zmym1	-0.435536	0.632832	1.30027	0.254165	1
ENSMUSG00000028458	Tesk1	0.36956	1.85993	1.29967	0.254274	1
ENSMUSG00000009614	Sardh	0.356523	9.10571	1.29895	0.254406	1
ENSMUSG00000078675	Mup16	-0.619428	8.63971	1.2988	0.254433	1
ENSMUSG00000050022	Amz1	0.555576	-0.0387956	1.29825	0.254533	1
ENSMUSG00000058613	Cyp2d41-ps	-0.386313	3.27687	1.29733	0.254701	1
ENSMUSG00000046312	Myorg	0.305597	5.10689	1.29733	0.254701	1
ENSMUSG00000063146	Clip2	-0.322306	0.842706	1.29724	0.254718	1
ENSMUSG00000057228	Aadat	0.257958	6.73772	1.29685	0.25479	1
ENSMUSG00000027956	Tmem144	0.341672	2.42501	1.29644	0.254865	1
ENSMUSG00000024673	Ms4a1	-0.681545	-0.527683	1.29609	0.254929	1
ENSMUSG00000024164	C3	0.286236	12.3835	1.29555	0.255027	1
ENSMUSG00000031983	2310022B05Rik	-0.260468	3.81439	1.29554	0.25503	1
ENSMUSG00000063511	Snrnp70	-0.313508	6.88574	1.29522	0.255089	1
ENSMUSG00000030172	Erc1	0.233659	4.36213	1.29468	0.255188	1
ENSMUSG00000036641	Ccdc148	-0.464043	0.525392	1.29407	0.255299	1
ENSMUSG00000062785	Kcnc3	-0.377501	2.51832	1.29323	0.255453	1
ENSMUSG00000022760	Thap7	-0.308373	3.2149	1.2928	0.255532	1
ENSMUSG00000031976	Urb2	0.368381	2.57253	1.29204	0.255672	1
ENSMUSG00000031574	Star	-0.315571	1.4587	1.29157	0.255758	1
ENSMUSG00000042190	Cmklr1	-0.327027	0.649519	1.2913	0.255809	1
ENSMUSG00000023991	Foxp4	-0.258564	3.76425	1.28968	0.256108	1
ENSMUSG00000003500	Impdh1	-0.327279	1.34428	1.2893	0.256177	1
ENSMUSG00000074657	Kif5a	-0.438993	1.76352	1.28919	0.256197	1
ENSMUSG00000039018	Mtg1	0.228216	4.35734	1.28891	0.256248	1
ENSMUSG00000042063	Zfp386	-0.259391	3.00809	1.28666	0.256665	1
ENSMUSG00000026822	Lcn2	1.2651	4.25685	1.28556	0.256868	1
ENSMUSG00000025157	Zdhhc16	0.278128	2.57835	1.28347	0.257256	1
ENSMUSG00000090258	Churc1	-0.275503	3.65667	1.28337	0.257274	1
ENSMUSG00000102869	2900097C17Rik	0.521094	1.17229	1.28097	0.257718	1
ENSMUSG00000023495	Pcbp4	-0.355078	3.95707	1.28031	0.257842	1
ENSMUSG00000035248	Tut7	0.282781	5.06776	1.27967	0.25796	1
ENSMUSG00000034220	Gpc1	0.481209	2.03985	1.27829	0.258217	1
ENSMUSG00000016942	Tmprss6	0.291671	8.58237	1.2782	0.258233	1
ENSMUSG00000055485	Soga1	-0.401216	0.169435	1.27775	0.258318	1
ENSMUSG00000054708	Ankrd24	-0.294508	2.47476	1.27767	0.258332	1
ENSMUSG00000021385	Ippk	0.266448	3.11056	1.27668	0.258517	1
ENSMUSG00000054836	Elp6	-0.309765	2.16368	1.27619	0.258608	1
ENSMUSG00000001440	Kpnb1	0.264618	6.22043	1.27495	0.258841	1
ENSMUSG00000070985	Acnat1	0.279229	4.25788	1.27443	0.258937	1
ENSMUSG00000105504	Gbp5	-0.338855	0.28855	1.27384	0.259047	1
ENSMUSG00000026986	Hnmt	0.320041	4.60034	1.27208	0.259376	1
ENSMUSG00000005899	Smpd4	-0.265588	3.8721	1.27175	0.259439	1
ENSMUSG00000047867	Gimap6	-0.251232	3.46261	1.27153	0.25948	1
ENSMUSG00000031706	Rfx1	-0.30038	3.38971	1.27135	0.259513	1
ENSMUSG00000028331	Trmo	-0.330064	1.82415	1.26988	0.25979	1
ENSMUSG00000039623	Ap5z1	-0.26489	3.92924	1.26965	0.259832	1
ENSMUSG00000037686	Aspg	-0.28656	8.02342	1.26902	0.259951	1
ENSMUSG00000028085	Gatb	0.262935	5.04805	1.2682	0.260106	1
ENSMUSG00000034574	Daam1	0.327886	5.66783	1.26781	0.260177	1
ENSMUSG00000028842	Ago3	-0.226905	4.02736	1.26761	0.260216	1
ENSMUSG00000024277	Mapre2	0.250923	4.22367	1.2662	0.260481	1
ENSMUSG00000031659	Adcy7	-0.330488	2.10168	1.26606	0.260506	1
ENSMUSG00000023348	Trip6	-0.261913	3.53966	1.26573	0.260569	1
ENSMUSG00000021120	Pigh	0.46575	0.586545	1.2651	0.260689	1
ENSMUSG00000074183	Gsta1	0.679457	0.996908	1.2648	0.260744	1
ENSMUSG00000032020	Ubash3b	-0.330008	0.498429	1.26433	0.260833	1
ENSMUSG00000039568	Ubald1	-0.303159	4.0355	1.26418	0.260861	1
ENSMUSG00000029090	Adgra3	0.29741	4.8664	1.26382	0.260929	1
ENSMUSG00000030259	Rassf8	0.264856	4.60417	1.26377	0.260939	1
ENSMUSG00000031609	Sap30	-0.370817	1.34584	1.26247	0.261184	1
ENSMUSG00000045968	Teddm2	-0.470321	0.675104	1.26002	0.261647	1
ENSMUSG00000025887	Casp12	-0.385118	0.726332	1.25977	0.261694	1
ENSMUSG00000024501	Dpysl3	-0.366762	0.765898	1.25953	0.261741	1
ENSMUSG00000039934	Gsap	0.249576	5.21525	1.25903	0.261835	1
ENSMUSG00000066513	Klk1b4	-0.483646	1.3613	1.25886	0.261867	1
ENSMUSG00000078789	Dph1	0.388858	3.05942	1.25832	0.261969	1
ENSMUSG00000067235	H2-Q10	-0.278625	11.134	1.25824	0.261985	1
ENSMUSG00000055805	Fmnl1	-0.410275	0.3222	1.25815	0.262002	1
ENSMUSG00000021250	Fos	0.886641	0.841875	1.25812	0.262007	1
ENSMUSG00000021703	Serinc5	0.314049	4.61211	1.25767	0.262093	1
ENSMUSG00000038298	Pdzk1	0.367996	4.62036	1.25762	0.262102	1
ENSMUSG00000026811	St6galnac6	0.28517	5.30874	1.2571	0.2622	1
ENSMUSG00000027669	Gnb4	-0.284794	1.88207	1.25385	0.262818	1
ENSMUSG00000041426	Hibch	0.272547	6.29367	1.2534	0.262904	1
ENSMUSG00000042487	Leo1	0.391541	2.70975	1.25321	0.262939	1
ENSMUSG00000089960	Ugt1a1	0.402035	5.79997	1.25306	0.262968	1
ENSMUSG00000049532	Sall2	-0.342905	1.74395	1.25267	0.263043	1
ENSMUSG00000026870	Cutal	0.296549	5.4681	1.25228	0.263118	1
ENSMUSG00000023004	Tuba1b	0.30522	4.80985	1.25094	0.263374	1
ENSMUSG00000034926	Dhcr24	0.454726	8.4402	1.24949	0.263649	1
ENSMUSG00000018427	Ypel2	0.375098	3.3483	1.24921	0.263704	1
ENSMUSG00000069769	Msi2	0.262954	3.42596	1.2492	0.263705	1
ENSMUSG00000057863	Rpl36	-0.372786	7.28224	1.24887	0.263769	1
ENSMUSG00000087361	0610043K17Rik	0.357054	2.64202	1.24885	0.263773	1
ENSMUSG00000026632	Tatdn3	-0.3097	2.35562	1.2484	0.263858	1
ENSMUSG00000024097	Srsf7	-0.254412	5.41353	1.248	0.263935	1
ENSMUSG00000030934	Oat	-0.442951	9.21386	1.24766	0.264001	1
ENSMUSG00000030513	Pcsk6	0.268029	6.55804	1.24602	0.264315	1
ENSMUSG00000073139	Tmem185a	0.246715	4.42656	1.24549	0.264416	1
ENSMUSG00000086429	Gt(ROSA)26Sor	-0.295613	2.63778	1.24516	0.264479	1
ENSMUSG00000097392	Thoc2l	-0.247806	3.70573	1.245	0.26451	1
ENSMUSG00000078517	Emc1	0.256795	4.01193	1.245	0.26451	1
ENSMUSG00000038775	Vill	-0.403064	0.226574	1.2449	0.264529	1
ENSMUSG00000038520	Tbc1d17	-0.275054	4.95006	1.24483	0.264541	1
ENSMUSG00000022822	Abcc5	-0.339826	2.93141	1.24424	0.264655	1
ENSMUSG00000061751	Kalrn	0.253686	4.58891	1.24251	0.264987	1
ENSMUSG00000021273	Fdft1	0.297207	7.05551	1.24226	0.265036	1
ENSMUSG00000056487	Mettl7a2	-0.419085	2.71902	1.24196	0.265093	1
ENSMUSG00000030782	Tgfb1i1	-0.375673	0.8074	1.24184	0.265117	1
ENSMUSG00000038167	Plekhg6	0.320009	2.95242	1.24162	0.265159	1
ENSMUSG00000089659	Gm3470	0.495346	0.0699468	1.23974	0.26552	1
ENSMUSG00000086316	Nbdy	-0.370497	0.579341	1.23814	0.26583	1
ENSMUSG00000025795	Rassf3	-0.43064	5.43118	1.23793	0.265871	1
ENSMUSG00000036822	Topors	0.268613	4.32617	1.23784	0.265889	1
ENSMUSG00000033705	Stard9	-0.309716	2.45938	1.23752	0.265949	1
ENSMUSG00000001506	Col1a1	-0.411933	1.4905	1.23737	0.265979	1
ENSMUSG00000024833	Pola2	-0.275943	2.76052	1.23714	0.266023	1
ENSMUSG00000039427	Alg1	0.25969	3.69817	1.2357	0.266301	1
ENSMUSG00000066072	Cyp4a10	-0.49817	7.53207	1.23401	0.266628	1
ENSMUSG00000023947	Nfkbie	-0.334946	0.950746	1.23397	0.266637	1
ENSMUSG00000032468	Armc8	0.239037	3.69413	1.2337	0.266688	1
ENSMUSG00000078974	Sec61g	-0.377466	5.85586	1.23369	0.26669	1
ENSMUSG00000030884	Uqcrc2	0.319319	7.77247	1.23362	0.266704	1
ENSMUSG00000106988	Tsg101-ps	0.426592	0.262047	1.23165	0.267086	1
ENSMUSG00000041881	Ndufa7	-0.235753	6.71763	1.23108	0.267197	1
ENSMUSG00000060600	Eno3	-0.346445	2.59772	1.2309	0.267232	1
ENSMUSG00000002324	Rec8	-0.623595	0.734201	1.23025	0.267359	1
ENSMUSG00000038473	Nos1ap	0.699447	0.555518	1.22957	0.26749	1
ENSMUSG00000068877	Selenbp2	-0.458569	10.1515	1.229	0.267602	1
ENSMUSG00000079139	Gm4204	-0.309363	2.02998	1.2275	0.267895	1
ENSMUSG00000015342	Xk	0.33757	1.7259	1.22688	0.268014	1
ENSMUSG00000048706	Lurap1l	-0.263645	5.3186	1.22564	0.268256	1
ENSMUSG00000027774	Gfm1	0.32647	6.06961	1.22512	0.268358	1
ENSMUSG00000038084	Opa1	0.264906	6.10933	1.22362	0.268651	1
ENSMUSG00000022865	Cxadr	0.331607	5.94396	1.22127	0.269112	1
ENSMUSG00000031309	Rps6ka3	-0.323663	3.19657	1.22122	0.269121	1
ENSMUSG00000037216	Lipt1	0.263698	2.6858	1.22047	0.269268	1
ENSMUSG00000017801	Mlx	0.259545	5.07095	1.21993	0.269375	1
ENSMUSG00000004341	Gpx6	-0.339665	0.572232	1.21979	0.269402	1
ENSMUSG00000041308	Sntb2	-0.291983	2.68994	1.21954	0.269451	1
ENSMUSG00000042759	Apobr	-0.384223	0.215129	1.21939	0.269481	1
ENSMUSG00000020309	Chac2	0.282304	4.60142	1.21935	0.269487	1
ENSMUSG00000048489	Depp1	-0.601144	6.23235	1.21909	0.269539	1
ENSMUSG00000025358	Cdk2	-0.265444	3.50372	1.21885	0.269586	1
ENSMUSG00000023032	Slc4a8	-0.411759	-0.20293	1.21842	0.269672	1
ENSMUSG00000042426	Dhx29	0.32307	3.31395	1.21706	0.269938	1
ENSMUSG00000098747	Gm27216	0.266219	4.11447	1.21666	0.270018	1
ENSMUSG00000074925	Ptar1	0.410063	0.413328	1.21664	0.270021	1
ENSMUSG00000042712	Tceal9	-0.28673	3.40427	1.21627	0.270095	1
ENSMUSG00000035614	Togaram1	0.299517	3.43128	1.21614	0.27012	1
ENSMUSG00000046861	Hectd3	0.217079	5.84744	1.21541	0.270263	1
ENSMUSG00000032648	Pygm	-0.451721	-0.0726896	1.21404	0.270534	1
ENSMUSG00000106535	Gm43031	-0.339565	0.44322	1.21393	0.270556	1
ENSMUSG00000027580	Helz2	0.306208	6.47921	1.21287	0.270764	1
ENSMUSG00000056492	Adgrf5	-0.275463	4.65738	1.21248	0.270842	1
ENSMUSG00000031985	Gnpat	0.247	5.28161	1.21229	0.270879	1
ENSMUSG00000037263	Aldh3b3	-0.368285	1.72479	1.211	0.271134	1
ENSMUSG00000060791	Gmfg	-0.270155	2.40922	1.21041	0.271251	1
ENSMUSG00000026384	Ptpn4	-0.362715	2.79752	1.21006	0.27132	1
ENSMUSG00000037649	H2-DMa	-0.354786	1.69493	1.20967	0.271397	1
ENSMUSG00000102411	Gm36936	-0.406374	0.846722	1.20902	0.271525	1
ENSMUSG00000074179	Gm10639	0.706236	1.10987	1.2083	0.271668	1
ENSMUSG00000037003	Tns2	-0.261456	5.7253	1.20822	0.271685	1
ENSMUSG00000025316	Banp	-0.313189	3.63434	1.20766	0.271796	1
ENSMUSG00000057322	Rpl38	-0.296068	6.8071	1.20715	0.271898	1
ENSMUSG00000031200	Mtcp1	-0.28215	1.99549	1.20703	0.271922	1
ENSMUSG00000025269	Apex2	-0.247704	3.06608	1.20678	0.271971	1
ENSMUSG00000064193	Gm4735	-0.797452	4.67107	1.2063	0.272066	1
ENSMUSG00000110781	Gm31992	-0.324196	0.70473	1.20617	0.272091	1
ENSMUSG00000019880	Rspo3	-0.28239	2.00155	1.20478	0.272368	1
ENSMUSG00000046338	Gpat2	-0.430123	1.23632	1.20429	0.272466	1
ENSMUSG00000025465	Echs1	0.277428	8.09309	1.20324	0.272675	1
ENSMUSG00000000339	Rtca	0.306083	1.91061	1.20229	0.272864	1
ENSMUSG00000038213	Tapbpl	0.262235	4.30681	1.2015	0.273021	1
ENSMUSG00000011254	Thg1l	0.332287	1.29088	1.20148	0.273027	1
ENSMUSG00000052298	Cdc42se2	0.256211	3.48157	1.2013	0.273063	1
ENSMUSG00000032500	Dclk3	0.250513	3.86305	1.20094	0.273134	1
ENSMUSG00000025272	Tro	-0.433558	0.77949	1.20088	0.273146	1
ENSMUSG00000031996	Aplp2	0.29951	7.89299	1.20065	0.273191	1
ENSMUSG00000027219	Slc28a2	-0.377205	0.217182	1.20064	0.273194	1
ENSMUSG00000019731	Slc35e1	0.223014	5.27996	1.20029	0.273265	1
ENSMUSG00000087413	Gm11266	-0.308526	2.13637	1.19974	0.273374	1
ENSMUSG00000021884	Hacl1	0.336302	8.05494	1.19809	0.273705	1
ENSMUSG00000086136	Gm12718	-1.49082	0.845026	1.19772	0.273779	1
ENSMUSG00000052305	Hbb-bs	0.431035	7.32182	1.19666	0.273991	1
ENSMUSG00000056204	Pgpep1	0.288	5.80255	1.19571	0.27418	1
ENSMUSG00000071796	6820431F20Rik	-0.314452	1.48498	1.19524	0.274276	1
ENSMUSG00000001166	Oas1c	0.4047	0.0838709	1.19505	0.274313	1
ENSMUSG00000090083	Rnf8	-0.340643	1.88861	1.19505	0.274314	1
ENSMUSG00000019158	Tmem160	-0.270105	4.00648	1.19496	0.274331	1
ENSMUSG00000015224	Cyp2j9	-0.465343	3.82965	1.19472	0.27438	1
ENSMUSG00000038545	Cul7	-0.26564	2.53013	1.19467	0.27439	1
ENSMUSG00000020122	Egfr	-0.367303	8.97791	1.1945	0.274424	1
ENSMUSG00000042632	Pla2g6	0.291407	5.32475	1.19366	0.274592	1
ENSMUSG00000026179	Pnkd	0.308992	5.23399	1.19266	0.274794	1
ENSMUSG00000049091	Sephs2	-0.261441	9.36202	1.19249	0.274827	1
ENSMUSG00000099338	2810030D12Rik	-0.392447	1.3483	1.19176	0.274974	1
ENSMUSG00000024163	Mapk8ip3	-0.316583	5.27057	1.19174	0.274979	1
ENSMUSG00000026343	Gpr39	0.410108	0.686563	1.19143	0.275041	1
ENSMUSG00000104548	Gm43857	-0.370687	0.0683384	1.19132	0.275063	1
ENSMUSG00000072647	Adam1a	-0.442613	0.105365	1.1897	0.275391	1
ENSMUSG00000083022	Rps15a-ps6	-0.46919	0.486911	1.18926	0.275479	1
ENSMUSG00000047767	Atg16l2	-0.364849	3.58916	1.18849	0.275635	1
ENSMUSG00000045237	1110012L19Rik	0.229931	3.63296	1.18842	0.275648	1
ENSMUSG00000027459	Fam110a	0.380411	0.82054	1.18754	0.275827	1
ENSMUSG00000086593	Gm16548	-0.363109	2.54705	1.1865	0.276036	1
ENSMUSG00000106734	Gm20559	-0.277696	2.23125	1.18584	0.276169	1
ENSMUSG00000062070	Pgk1	0.329276	7.41064	1.1855	0.27624	1
ENSMUSG00000027474	Ccm2l	-0.363431	2.21769	1.18428	0.276486	1
ENSMUSG00000014907	Naf1	-0.32024	1.47487	1.18352	0.276641	1
ENSMUSG00000028757	Ddost	-0.247921	6.3916	1.18245	0.276858	1
ENSMUSG00000027358	Bmp2	-0.308407	3.74912	1.18236	0.276875	1
ENSMUSG00000040701	Ap1g2	-0.241562	3.20595	1.18151	0.277049	1
ENSMUSG00000074918	Inafm2	-0.235988	3.4336	1.18132	0.277087	1
ENSMUSG00000004383	Large1	0.362498	1.99396	1.18103	0.277146	1
ENSMUSG00000041775	Mapk1ip1	-0.283203	3.24132	1.18066	0.277223	1
ENSMUSG00000023953	Polh	0.39771	1.52619	1.18033	0.277288	1
ENSMUSG00000069255	Dusp22	-0.238771	3.3571	1.18018	0.277319	1
ENSMUSG00000051452	Gm11437	0.553926	1.09019	1.18012	0.277332	1
ENSMUSG00000032009	Sesn3	0.289134	4.20213	1.17952	0.277453	1
ENSMUSG00000040097	Flywch1	0.299893	2.59419	1.17833	0.277695	1
ENSMUSG00000038351	Sgsm2	0.340068	2.409	1.17818	0.277727	1
ENSMUSG00000110206	Flt3l	-0.347824	2.22426	1.1781	0.277743	1
ENSMUSG00000034361	Cpne2	-0.343496	2.81159	1.17806	0.277751	1
ENSMUSG00000039221	Rpl22l1	-0.314589	4.99917	1.17755	0.277856	1
ENSMUSG00000014361	Mertk	-0.275887	4.57724	1.1774	0.277885	1
ENSMUSG00000048897	Zfp710	0.263819	3.31955	1.17726	0.277915	1
ENSMUSG00000029570	Lfng	-0.365583	1.64578	1.17675	0.278018	1
ENSMUSG00000049764	Zfp280b	0.274816	2.7371	1.17615	0.278142	1
ENSMUSG00000038599	Capn8	0.648106	2.94894	1.17605	0.278161	1
ENSMUSG00000032360	Hcrtr2	-1.22034	-0.825331	1.17579	0.278215	1
ENSMUSG00000097574	C920006O11Rik	-0.322241	2.23963	1.17451	0.278477	1
ENSMUSG00000022350	Washc5	0.278832	4.29426	1.17379	0.278624	1
ENSMUSG00000040167	Ikzf5	-0.410102	0.177661	1.17356	0.278671	1
ENSMUSG00000029195	Klb	0.356846	3.87191	1.17322	0.278741	1
ENSMUSG00000026064	Ptp4a1	-0.229785	6.35007	1.17295	0.278796	1
ENSMUSG00000017697	Ada	-0.318832	0.805943	1.17278	0.278832	1
ENSMUSG00000059326	Csf2ra	-0.447832	1.7816	1.17176	0.279039	1
ENSMUSG00000029625	Cpsf4	-0.280453	4.28455	1.16814	0.279784	1
ENSMUSG00000020790	Ankfy1	0.252693	4.92621	1.16777	0.27986	1
ENSMUSG00000049090	Zadh2	0.321285	6.14286	1.16676	0.280067	1
ENSMUSG00000021759	Plpp1	-0.329658	3.50184	1.16612	0.2802	1
ENSMUSG00000107951	Gm6210	0.322858	1.53234	1.16462	0.28051	1
ENSMUSG00000022519	Srl	0.671809	-0.546126	1.16318	0.280806	1
ENSMUSG00000066621	Tecpr1	-0.268532	3.58166	1.16196	0.281059	1
ENSMUSG00000029695	Aass	0.272176	8.03323	1.16189	0.281074	1
ENSMUSG00000028803	Nipal3	0.266283	2.71277	1.16106	0.281247	1
ENSMUSG00000002319	Ipo4	-0.25791	4.76031	1.16064	0.281334	1
ENSMUSG00000096795	Zfp433	-0.298224	1.23509	1.15999	0.281468	1
ENSMUSG00000027333	Smox	0.385393	1.48455	1.15996	0.281473	1
ENSMUSG00000026126	Ptpn18	-0.366934	0.466217	1.15913	0.281645	1
ENSMUSG00000039473	Ubn1	-0.217978	4.81774	1.15883	0.281709	1
ENSMUSG00000072082	Ccnf	-0.345398	3.62977	1.1564	0.282214	1
ENSMUSG00000024254	Abcg8	-0.412475	6.30322	1.1554	0.282422	1
ENSMUSG00000066553	Gm6969	0.318762	2.30052	1.15523	0.282457	1
ENSMUSG00000058056	Palld	0.276283	5.54593	1.15399	0.282714	1
ENSMUSG00000081208	Gm11400	-0.647211	1.02232	1.15375	0.282766	1
ENSMUSG00000001228	Uhrf1	0.900697	0.532712	1.15373	0.28277	1
ENSMUSG00000097039	Pvt1	0.413673	0.899681	1.15253	0.283019	1
ENSMUSG00000028167	Bdh2	0.293065	4.29563	1.15244	0.283039	1
ENSMUSG00000041781	Cpsf2	0.246569	4.17239	1.15208	0.283114	1
ENSMUSG00000099034	2810039B14Rik	-0.3157	1.59744	1.15197	0.283136	1
ENSMUSG00000022401	Xpnpep3	0.315893	3.98972	1.15196	0.283139	1
ENSMUSG00000002109	Ddb2	-0.285026	2.40481	1.15178	0.283176	1
ENSMUSG00000064637	Snora20	0.537873	1.23981	1.15144	0.283248	1
ENSMUSG00000006412	Pfdn2	-0.2128	5.11058	1.15141	0.283254	1
ENSMUSG00000039318	Rab3gap2	0.217501	4.10158	1.1499	0.28357	1
ENSMUSG00000052291	5330438D12Rik	-0.388877	0.361416	1.14947	0.283661	1
ENSMUSG00000110841	Gpx4-ps2	-0.264194	6.32695	1.14894	0.283771	1
ENSMUSG00000020513	Tubd1	0.286431	2.23428	1.14894	0.283772	1
ENSMUSG00000026782	Abi2	-0.351731	2.00964	1.14855	0.283854	1
ENSMUSG00000083716	Gm13436	-0.259859	4.09557	1.14772	0.284026	1
ENSMUSG00000045538	Ddx28	-0.265962	3.57843	1.14769	0.284033	1
ENSMUSG00000026409	Pfkfb2	-0.372956	3.82159	1.14728	0.284119	1
ENSMUSG00000036672	Cenpt	-0.347711	1.03343	1.14723	0.284129	1
ENSMUSG00000100017	2410022M11Rik	-0.440431	0.994748	1.14708	0.284162	1
ENSMUSG00000045691	Thtpa	0.299732	3.84682	1.14593	0.284403	1
ENSMUSG00000050064	Zfp697	0.387637	1.30562	1.14484	0.284632	1
ENSMUSG00000058586	Serhl	0.253264	3.82385	1.14458	0.284687	1
ENSMUSG00000030108	Slc6a13	0.241418	7.78907	1.14437	0.284731	1
ENSMUSG00000062646	Ganc	-0.243608	4.56114	1.14366	0.28488	1
ENSMUSG00000085037	4933421O10Rik	-0.427903	1.35138	1.14357	0.2849	1
ENSMUSG00000047721	Bola2	-0.295236	4.12948	1.1421	0.285209	1
ENSMUSG00000020024	Cep83	-0.295665	2.48254	1.14192	0.285247	1
ENSMUSG00000027950	Chrnb2	-0.328255	1.02445	1.14185	0.285262	1
ENSMUSG00000021892	Sh3bp5	0.234089	5.23527	1.14156	0.285322	1
ENSMUSG00000045136	Tubb2b	0.539828	2.86025	1.14119	0.285402	1
ENSMUSG00000053329	Gatd3a	0.229559	6.67287	1.14106	0.285428	1
ENSMUSG00000105096	Gbp10	0.399148	2.13803	1.14046	0.285555	1
ENSMUSG00000019997	Ccn2	-0.467669	1.62527	1.14029	0.285592	1
ENSMUSG00000032420	Nt5e	0.35454	3.68238	1.13998	0.285656	1
ENSMUSG00000090137	Uba52	-0.382709	1.42578	1.13919	0.285823	1
ENSMUSG00000111817	Gm47154	-0.433703	1.73891	1.1388	0.285906	1
ENSMUSG00000073565	Prr16	0.22754	4.78445	1.13792	0.286092	1
ENSMUSG00000067369	Trmt2b	0.246858	4.90784	1.1374	0.286202	1
ENSMUSG00000022906	Parp9	0.268506	5.54521	1.13738	0.286206	1
ENSMUSG00000055493	Epm2a	0.343831	1.99197	1.13715	0.286255	1
ENSMUSG00000053617	Sh3pxd2a	0.35025	3.81362	1.1363	0.286436	1
ENSMUSG00000052031	Tagap1	-0.333744	4.31689	1.13595	0.286509	1
ENSMUSG00000025354	Dnajc14	0.291668	4.38567	1.13571	0.286561	1
ENSMUSG00000036745	Ttll7	-0.355325	0.122937	1.13566	0.286572	1
ENSMUSG00000006423	C330007P06Rik	0.316399	4.42436	1.1356	0.286585	1
ENSMUSG00000099590	C330022C24Rik	-0.469737	1.3398	1.13537	0.286632	1
ENSMUSG00000011179	Odc1	0.221551	6.15597	1.13466	0.286783	1
ENSMUSG00000037933	Bicd2	-0.229044	4.38394	1.13321	0.287092	1
ENSMUSG00000073411	H2-D1	0.367574	8.83504	1.13245	0.287253	1
ENSMUSG00000061533	Cep128	0.414425	0.0301493	1.13225	0.287296	1
ENSMUSG00000006134	Crkl	0.358469	3.84955	1.13171	0.287412	1
ENSMUSG00000026142	Rhbdd1	0.225677	4.04918	1.13133	0.287492	1
ENSMUSG00000040370	Etfrf1	0.23985	5.69007	1.1313	0.287498	1
ENSMUSG00000090086	AI480526	-0.30448	3.85763	1.13083	0.287598	1
ENSMUSG00000053646	Plxnb1	-0.228185	5.79826	1.13077	0.287611	1
ENSMUSG00000045377	Tmem88	-0.338899	1.23131	1.1298	0.287819	1
ENSMUSG00000074623	Gm826	-0.463534	1.78007	1.12879	0.288034	1
ENSMUSG00000108624	Gm45091	-0.457683	-0.339222	1.12823	0.288153	1
ENSMUSG00000055436	Srsf11	-0.265142	6.43067	1.1278	0.288244	1
ENSMUSG00000021039	Snw1	0.331044	3.64011	1.12671	0.288478	1
ENSMUSG00000085741	5430405H02Rik	-0.348213	0.33471	1.12642	0.28854	1
ENSMUSG00000017723	Wfdc2	0.279681	2.60675	1.12542	0.288754	1
ENSMUSG00000040035	Disp2	-1.72056	1.29848	1.12537	0.288765	1
ENSMUSG00000023939	Mrpl14	-0.226395	5.55051	1.12529	0.288782	1
ENSMUSG00000022941	Ripply3	-0.341128	0.56515	1.1235	0.289167	1
ENSMUSG00000003847	Nfat5	-0.245426	5.42033	1.12334	0.2892	1
ENSMUSG00000052921	Arhgef15	-0.259846	3.02881	1.12281	0.289315	1
ENSMUSG00000062963	Ufc1	-0.219785	5.95202	1.12264	0.289351	1
ENSMUSG00000085401	Slc39a1-ps	0.354616	1.79125	1.12188	0.289513	1
ENSMUSG00000020770	Unk	-0.262782	3.17685	1.11993	0.289935	1
ENSMUSG00000032185	Carm1	0.266354	3.40284	1.11984	0.289952	1
ENSMUSG00000031877	Ces2g	0.280569	5.68913	1.11972	0.289979	1
ENSMUSG00000021831	Ero1l	0.241161	3.77803	1.11825	0.290296	1
ENSMUSG00000005980	Dnase1	-0.366372	0.109288	1.118	0.29035	1
ENSMUSG00000046897	Zfp740	-0.229654	4.80326	1.11766	0.290422	1
ENSMUSG00000056209	Npm3	-0.222987	3.64392	1.11745	0.290468	1
ENSMUSG00000061983	Rps12	-0.294612	7.87471	1.11554	0.290881	1
ENSMUSG00000052137	Rbm12b2	-0.280933	3.63924	1.11413	0.291186	1
ENSMUSG00000066149	Cdc26	-0.208986	4.60865	1.11386	0.291244	1
ENSMUSG00000026395	Ptprc	-0.329449	3.21639	1.1138	0.291258	1
ENSMUSG00000032842	Abcc10	-0.30841	4.16683	1.11298	0.291435	1
ENSMUSG00000043943	Naalad2	-0.376183	0.545953	1.11237	0.291567	1
ENSMUSG00000025450	Gm9752	-0.406187	2.02456	1.112	0.291647	1
ENSMUSG00000082676	Gm11843	-0.525767	-0.0276328	1.11149	0.291758	1
ENSMUSG00000065947	mt-Nd4l	0.347892	9.87939	1.11131	0.291796	1
ENSMUSG00000073471	Rsph3a	0.239903	3.4714	1.11056	0.29196	1
ENSMUSG00000085006	BC021767	0.438196	2.17283	1.11009	0.292062	1
ENSMUSG00000061286	Exosc5	-0.274508	4.73307	1.10978	0.29213	1
ENSMUSG00000073867	AA474408	-0.43823	0.963099	1.10927	0.29224	1
ENSMUSG00000034390	Cmip	0.320902	3.33136	1.10927	0.292241	1
ENSMUSG00000046207	Pik3r6	-0.317701	0.190331	1.10824	0.292465	1
ENSMUSG00000012640	Zfp715	-0.328843	4.0976	1.10733	0.292663	1
ENSMUSG00000063455	D630045J12Rik	-0.427294	1.90961	1.10699	0.292738	1
ENSMUSG00000030660	Pik3c2a	0.410604	4.28359	1.10472	0.293232	1
ENSMUSG00000029020	Mfn2	0.27626	6.25452	1.10458	0.293262	1
ENSMUSG00000064351	mt-Co1	0.322478	14.1568	1.10393	0.293405	1
ENSMUSG00000002032	Tmem25	-0.258864	6.35618	1.10325	0.293554	1
ENSMUSG00000027160	Ccdc34	-0.417173	0.328315	1.10316	0.293574	1
ENSMUSG00000039096	Rsad1	-0.274091	3.42502	1.10273	0.293668	1
ENSMUSG00000101188	Eif4a-ps4	0.233522	4.7499	1.10161	0.293912	1
ENSMUSG00000047109	Cldn14	0.387924	3.17769	1.10152	0.293933	1
ENSMUSG00000038344	Txlng	-0.247371	5.21841	1.10087	0.294075	1
ENSMUSG00000033970	Rfc3	-0.265536	2.39721	1.10064	0.294126	1
ENSMUSG00000001313	Rnd2	0.451624	4.03584	1.1005	0.294157	1
ENSMUSG00000022684	Bfar	-0.270019	5.7232	1.10034	0.294192	1
ENSMUSG00000027488	Snta1	0.239057	4.30657	1.10011	0.294242	1
ENSMUSG00000081087	Rps15a-ps7	-0.375816	1.03723	1.09754	0.294807	1
ENSMUSG00000034795	Ccdc122	0.426474	1.29651	1.0972	0.294881	1
ENSMUSG00000041078	Grid1	0.611016	0.998309	1.09613	0.295116	1
ENSMUSG00000029038	Ssu72	0.219719	4.81474	1.09597	0.295152	1
ENSMUSG00000057530	Ece1	0.250409	7.36265	1.09539	0.29528	1
ENSMUSG00000045106	Ccdc73	-0.383405	0.277982	1.09513	0.295337	1
ENSMUSG00000069114	Zbtb10	-0.391468	1.78698	1.09498	0.295372	1
ENSMUSG00000005672	Kit	-0.358242	2.27588	1.09423	0.295535	1
ENSMUSG00000027536	Chmp4c	0.303044	1.7973	1.09382	0.295626	1
ENSMUSG00000065952	C330021F23Rik	0.4276	1.27923	1.09321	0.295761	1
ENSMUSG00000010277	2610507B11Rik	0.25648	6.9608	1.09164	0.296109	1
ENSMUSG00000048218	Amigo2	-0.252196	3.40023	1.09143	0.296156	1
ENSMUSG00000022035	Ccdc25	0.227749	4.94418	1.09038	0.296387	1
ENSMUSG00000061724	Gm2423	0.432604	0.0345477	1.09032	0.296401	1
ENSMUSG00000087368	BC065397	-0.326683	0.0595653	1.08862	0.296777	1
ENSMUSG00000085962	Gm16984	-0.464149	0.582503	1.08752	0.29702	1
ENSMUSG00000055923	Aasdh	-0.221655	3.34197	1.08591	0.297378	1
ENSMUSG00000086265	Marcksl1-ps4	0.388466	2.48151	1.08526	0.297523	1
ENSMUSG00000027412	Lpin3	-0.341408	2.08745	1.08494	0.297595	1
ENSMUSG00000026576	Atp1b1	0.240102	5.58102	1.08486	0.297613	1
ENSMUSG00000004896	Rrnad1	-0.231892	4.01046	1.08462	0.297665	1
ENSMUSG00000010914	Pdhx	0.263248	4.78364	1.08459	0.297673	1
ENSMUSG00000109698	Gm45469	0.468402	0.382221	1.08429	0.297739	1
ENSMUSG00000003810	Mast2	-0.261577	3.75441	1.08396	0.297813	1
ENSMUSG00000083718	Ccnb2-ps	-0.393848	-0.0208775	1.08374	0.297862	1
ENSMUSG00000040390	Map3k10	-0.253582	3.06845	1.08326	0.297969	1
ENSMUSG00000028076	Cd1d1	0.26122	8.07584	1.08307	0.298011	1
ENSMUSG00000057329	Bcl2	-0.353286	0.673548	1.08141	0.298381	1
ENSMUSG00000075415	Fnbp1	-0.251528	4.09961	1.07951	0.298808	1
ENSMUSG00000024905	Tesmin	-0.461425	0.219517	1.07919	0.298879	1
ENSMUSG00000029326	Enoph1	0.289132	2.20479	1.0784	0.299056	1
ENSMUSG00000021338	Carmil1	-0.281523	4.09999	1.07715	0.299336	1
ENSMUSG00000010797	Wnt2	-0.351175	1.50989	1.07701	0.299367	1
ENSMUSG00000021114	Atp6v1d	0.199256	5.29967	1.07698	0.299373	1
ENSMUSG00000049313	Sorl1	0.570334	1.87313	1.0768	0.299415	1
ENSMUSG00000057880	Abat	0.311871	7.66883	1.07646	0.299492	1
ENSMUSG00000009654	Oit3	-0.280019	4.40257	1.07624	0.299539	1
ENSMUSG00000066363	Serpina3f	-0.395404	1.44039	1.07619	0.299551	1
ENSMUSG00000027203	Dut	0.251194	3.02891	1.07598	0.299598	1
ENSMUSG00000022178	Ajuba	0.381278	2.8075	1.07547	0.299714	1
ENSMUSG00000048234	Rnf149	0.292395	5.24769	1.07543	0.299723	1
ENSMUSG00000052085	Dock8	0.341543	4.56673	1.07534	0.299742	1
ENSMUSG00000029192	Tbc1d14	0.261677	3.9461	1.07389	0.300069	1
ENSMUSG00000030199	Etv6	0.245314	3.83296	1.07348	0.300161	1
ENSMUSG00000070002	Ell	-0.243885	5.24319	1.07295	0.300279	1
ENSMUSG00000044950	Pwwp2a	-0.284666	3.44702	1.07282	0.30031	1
ENSMUSG00000091387	Gcnt4	-0.443089	2.20667	1.0713	0.300653	1
ENSMUSG00000030091	Nup210	0.271107	3.85544	1.07074	0.300778	1
ENSMUSG00000033624	Pdpr	0.589874	2.85908	1.07041	0.300853	1
ENSMUSG00000035530	Eif1	-0.276258	8.26433	1.06992	0.300963	1
ENSMUSG00000062822	4833420G17Rik	-0.321288	4.88991	1.06978	0.300994	1
ENSMUSG00000005125	Ndrg1	-0.313312	2.50107	1.06816	0.301362	1
ENSMUSG00000004473	Clec11a	0.314567	0.64378	1.06803	0.30139	1
ENSMUSG00000052407	Ccdc171	0.339795	3.14767	1.06795	0.301408	1
ENSMUSG00000023272	Creld2	-0.693869	6.15625	1.06778	0.301447	1
ENSMUSG00000023075	Akirin1	0.229897	4.81464	1.0677	0.301466	1
ENSMUSG00000081909	Gm11341	-0.451094	-0.148792	1.06701	0.301621	1
ENSMUSG00000061330	Gm6436	0.473518	3.3596	1.0661	0.301829	1
ENSMUSG00000084910	C630043F03Rik	-0.44033	1.65291	1.06608	0.301833	1
ENSMUSG00000031378	Abcd1	0.338365	4.28195	1.06465	0.302156	1
ENSMUSG00000037408	Cnnm4	0.295942	1.2599	1.06455	0.30218	1
ENSMUSG00000059834	Sclt1	-0.317481	2.44909	1.06428	0.302241	1
ENSMUSG00000041845	Rhod	0.256765	3.99323	1.0637	0.302373	1
ENSMUSG00000005089	Slc1a2	-0.242763	7.18242	1.0636	0.302395	1
ENSMUSG00000031133	Arhgef6	-0.276124	1.989	1.06218	0.302718	1
ENSMUSG00000061808	Ttr	-0.285311	12.6173	1.06197	0.302766	1
ENSMUSG00000011034	Slc5a1	0.423854	0.204253	1.0619	0.302783	1
ENSMUSG00000085826	Gm15638	-0.462867	3.22728	1.06174	0.30282	1
ENSMUSG00000011263	Exoc3l2	-0.274546	2.72689	1.06057	0.303084	1
ENSMUSG00000033352	Map2k4	0.223872	4.98111	1.06007	0.3032	1
ENSMUSG00000025815	Dhtkd1	0.302371	6.01939	1.0597	0.303283	1
ENSMUSG00000043207	Zmpste24	0.296554	5.73948	1.05893	0.303459	1
ENSMUSG00000030761	Myo7a	-0.238038	4.05729	1.05839	0.303583	1
ENSMUSG00000033538	Casp4	-0.357232	0.613248	1.05831	0.303601	1
ENSMUSG00000037773	Pced1a	-0.209761	4.0028	1.05769	0.303743	1
ENSMUSG00000020783	Ncbp3	0.260834	3.72014	1.05756	0.303773	1
ENSMUSG00000022817	Itgb5	0.250211	5.53013	1.05744	0.303799	1
ENSMUSG00000025240	Sacm1l	0.512023	3.96264	1.05725	0.303843	1
ENSMUSG00000051615	Rap2a	0.232049	4.42369	1.05644	0.304028	1
ENSMUSG00000009035	Tmem184b	0.2786	4.55005	1.05601	0.304126	1
ENSMUSG00000023886	Smoc2	-0.30321	2.07223	1.05566	0.304207	1
ENSMUSG00000020456	Ogdh	0.234903	6.89101	1.05486	0.30439	1
ENSMUSG00000037907	Ankrd13b	-0.337641	1.65747	1.05469	0.304429	1
ENSMUSG00000032902	Slc16a1	0.251893	5.29506	1.05462	0.304445	1
ENSMUSG00000047242	Taf9b	-0.338074	0.179516	1.05448	0.304477	1
ENSMUSG00000053317	Sec61b	-0.249585	5.99527	1.05432	0.304515	1
ENSMUSG00000036572	Upf3b	-0.260964	4.0604	1.05176	0.305102	1
ENSMUSG00000032796	Lama1	0.285089	2.20506	1.05172	0.305111	1
ENSMUSG00000037049	Smpd1	0.219277	5.33549	1.05158	0.305144	1
ENSMUSG00000038895	Zfp653	-0.317327	2.95508	1.05134	0.305199	1
ENSMUSG00000028394	Pole3	-0.204081	4.45228	1.05051	0.305389	1
ENSMUSG00000015747	Vps45	0.278536	2.73369	1.04896	0.305748	1
ENSMUSG00000056692	Ilrun	0.236891	7.4853	1.04858	0.305834	1
ENSMUSG00000003660	Snrnp200	0.223694	6.05384	1.04812	0.305941	1
ENSMUSG00000015478	Rnf5	0.212737	5.21003	1.04774	0.306028	1
ENSMUSG00000042797	Aqp11	0.228724	5.43241	1.04746	0.306093	1
ENSMUSG00000028800	Hdac1	-0.22694	4.03509	1.04727	0.306137	1
ENSMUSG00000033768	Nrxn2	-0.481923	0.0982071	1.04726	0.306138	1
ENSMUSG00000032462	Pik3cb	0.286567	4.10901	1.0456	0.306522	1
ENSMUSG00000075284	Wipf1	-0.277119	1.96663	1.04519	0.306619	1
ENSMUSG00000026112	Coa5	0.214977	6.35285	1.04515	0.306627	1
ENSMUSG00000022521	Crebbp	-0.209838	4.47441	1.04505	0.306649	1
ENSMUSG00000035811	Ugt2b35	0.324023	7.33826	1.04448	0.306782	1
ENSMUSG00000034639	Setmar	-0.300653	1.9295	1.04296	0.307134	1
ENSMUSG00000019432	Ddx39b	-0.247912	5.9477	1.04251	0.307239	1
ENSMUSG00000027009	Itga4	-0.375589	2.07521	1.04166	0.307436	1
ENSMUSG00000069743	Zfp820	-0.322505	1.77008	1.0415	0.307472	1
ENSMUSG00000026107	Nabp1	-0.284991	4.15092	1.04137	0.307504	1
ENSMUSG00000104802	Gm5869	0.409659	4.83554	1.04129	0.307523	1
ENSMUSG00000100147	1700047M11Rik	-0.360172	0.746871	1.0412	0.307543	1
ENSMUSG00000022215	Fitm1	-0.343948	3.7127	1.04086	0.307621	1
ENSMUSG00000040345	Arhgap9	-0.328047	1.16209	1.04008	0.307803	1
ENSMUSG00000035069	Oma1	0.255197	3.67248	1.03972	0.307888	1
ENSMUSG00000073842	Mup7	0.522612	12.6901	1.03935	0.307973	1
ENSMUSG00000041515	Irf8	-0.272425	2.60714	1.0393	0.307985	1
ENSMUSG00000026674	Ddr2	-0.271764	2.0678	1.03923	0.308001	1
ENSMUSG00000063275	Hacd1	0.240577	2.94105	1.03918	0.308012	1
ENSMUSG00000024869	Gm49405	-0.308089	0.833835	1.03886	0.308088	1
ENSMUSG00000015451	C4a	0.344921	7.95256	1.03866	0.308133	1
ENSMUSG00000038384	Setd1b	-0.319595	4.30864	1.03866	0.308134	1
ENSMUSG00000071655	Ubxn1	-0.221199	6.02118	1.03802	0.308282	1
ENSMUSG00000040552	C3ar1	0.361407	1.46667	1.03779	0.308336	1
ENSMUSG00000029416	Slc15a4	0.550292	5.63077	1.03762	0.308376	1
ENSMUSG00000029089	5730480H06Rik	-0.274547	2.41413	1.03756	0.30839	1
ENSMUSG00000052337	Immt	0.203044	6.41931	1.03694	0.308534	1
ENSMUSG00000003032	Klf4	0.338468	0.132369	1.0369	0.308545	1
ENSMUSG00000030739	Myh14	0.254591	3.49089	1.0357	0.308823	1
ENSMUSG00000060216	Arrb2	-0.295942	4.06076	1.03559	0.308849	1
ENSMUSG00000026604	Ptpn14	-0.299204	0.922738	1.03554	0.30886	1
ENSMUSG00000031371	Haus7	-0.271265	3.65508	1.03553	0.308864	1
ENSMUSG00000026156	B3gat2	-0.400557	0.0754247	1.03544	0.308885	1
ENSMUSG00000075470	Alg10b	0.547398	2.99665	1.03498	0.308992	1
ENSMUSG00000031939	Taf1d	-0.219366	4.33245	1.03463	0.309073	1
ENSMUSG00000020267	Hint1	-0.246686	7.4446	1.03453	0.309097	1
ENSMUSG00000014850	Msh3	-0.26952	3.69544	1.03378	0.309273	1
ENSMUSG00000032244	Fem1b	0.224879	4.08947	1.03362	0.309311	1
ENSMUSG00000027583	Zbtb46	-0.252808	2.70634	1.03228	0.309625	1
ENSMUSG00000042541	Sem1	-0.246106	6.15679	1.03227	0.309625	1
ENSMUSG00000018845	Unc45b	-0.348136	1.03148	1.03197	0.309696	1
ENSMUSG00000057982	Zfp809	0.383631	4.93927	1.03111	0.309898	1
ENSMUSG00000025757	Hspa4l	0.334051	4.39204	1.0308	0.30997	1
ENSMUSG00000032952	Ap4b1	-0.390348	1.49457	1.0308	0.30997	1
ENSMUSG00000028576	Ift74	-0.285932	1.3608	1.03077	0.309979	1
ENSMUSG00000004070	Hmox2	0.209295	4.74656	1.0303	0.310089	1
ENSMUSG00000079478	Znrd2	-0.299346	2.62954	1.03026	0.310097	1
ENSMUSG00000024601	Isoc1	0.355708	5.60482	1.02927	0.310331	1
ENSMUSG00000020277	Pfkl	0.214289	5.0501	1.02905	0.310383	1
ENSMUSG00000019054	Fis1	-0.212338	6.18398	1.02859	0.31049	1
ENSMUSG00000039087	Rreb1	0.216731	4.83689	1.02798	0.310633	1
ENSMUSG00000007646	Rad51c	-0.498302	-0.498531	1.02717	0.310825	1
ENSMUSG00000073478	D730003I15Rik	-0.340887	0.598911	1.02715	0.310828	1
ENSMUSG00000085334	Gm12940	-0.3181	3.27736	1.02714	0.310831	1
ENSMUSG00000035042	Ccl5	-0.477258	0.472442	1.027	0.310865	1
ENSMUSG00000063316	Rpl27	-0.243619	6.24681	1.02524	0.311278	1
ENSMUSG00000038530	Rgs4	-0.305495	1.04713	1.02486	0.311368	1
ENSMUSG00000066800	Rnasel	-0.319446	0.981003	1.02478	0.311389	1
ENSMUSG00000030946	Lhpp	-0.346253	5.58283	1.02361	0.311665	1
ENSMUSG00000002458	Rgs19	-0.360925	0.923433	1.02306	0.311795	1
ENSMUSG00000030322	Mbd4	0.33349	1.18835	1.02283	0.311849	1
ENSMUSG00000033904	Ccp110	-0.265682	3.16943	1.02276	0.311865	1
ENSMUSG00000058318	Phf21a	-0.268514	3.80955	1.02269	0.311882	1
ENSMUSG00000020495	Smg8	0.234082	2.96703	1.02255	0.311914	1
ENSMUSG00000029998	Pcyox1	0.250265	7.13019	1.02237	0.311958	1
ENSMUSG00000022220	Adcy4	-0.299954	2.42695	1.01945	0.312648	1
ENSMUSG00000040663	Clcf1	-0.408701	0.036156	1.01934	0.312677	1
ENSMUSG00000045875	Adra1a	0.418616	1.45145	1.01878	0.312808	1
ENSMUSG00000035413	Tmem98	0.28281	2.84888	1.01872	0.312823	1
ENSMUSG00000038323	1700066M21Rik	0.235906	4.65888	1.01834	0.312912	1
ENSMUSG00000001151	Pcnt	-0.231904	3.2141	1.01831	0.31292	1
ENSMUSG00000059149	Mfsd4a	0.343996	3.1921	1.01821	0.312945	1
ENSMUSG00000020528	Prpsap2	0.262219	3.36644	1.01811	0.312967	1
ENSMUSG00000030378	Sult2a8	-0.276182	9.62279	1.01811	0.312969	1
ENSMUSG00000110275	Gm5905	-0.290297	2.5879	1.01796	0.313004	1
ENSMUSG00000033862	Cdk10	-0.219897	4.36011	1.01757	0.313097	1
ENSMUSG00000087556	Gm15764	-0.287266	1.24805	1.01722	0.31318	1
ENSMUSG00000001670	Tat	0.39037	10.1098	1.01717	0.313192	1
ENSMUSG00000079834	Tmlhe	0.32846	3.25234	1.01703	0.313224	1
ENSMUSG00000001089	Luzp1	0.200111	4.10263	1.01695	0.313243	1
ENSMUSG00000041653	Pnpla3	1.205	4.63082	1.01662	0.313323	1
ENSMUSG00000033634	Nat8f2	0.291549	9.95565	1.01568	0.313546	1
ENSMUSG00000034258	Flvcr2	-0.328095	0.737778	1.0154	0.313613	1
ENSMUSG00000026820	Ptges2	0.207304	4.30523	1.01367	0.314025	1
ENSMUSG00000041798	Gck	0.522985	7.77106	1.0136	0.314042	1
ENSMUSG00000020607	Lratd1	0.360538	0.384812	1.01345	0.314077	1
ENSMUSG00000043683	Fem1a	0.202773	4.98434	1.01325	0.314124	1
ENSMUSG00000009092	Derl3	-1.10308	2.65554	1.01301	0.314183	1
ENSMUSG00000040746	Rnf167	-0.203499	5.37329	1.01274	0.314247	1
ENSMUSG00000076613	Ighg2b	-0.790446	1.47075	1.01214	0.31439	1
ENSMUSG00000025271	Pfkfb1	-0.402031	5.5644	1.01205	0.314413	1
ENSMUSG00000040548	Tex2	0.221515	6.38914	1.01062	0.314755	1
ENSMUSG00000024759	Atl3	0.359985	6.59773	1.01058	0.314765	1
ENSMUSG00000058013	2020-09-11	0.368737	3.3156	1.0104	0.314807	1
ENSMUSG00000032633	Flcn	-0.31228	4.97648	1.01029	0.314834	1
ENSMUSG00000036305	Rpl39-ps	-0.333543	2.23867	1.00906	0.315129	1
ENSMUSG00000030219	Erp27	0.475761	1.09003	1.00854	0.315252	1
ENSMUSG00000019773	Fbxo5	-0.319853	0.355567	1.00825	0.315323	1
ENSMUSG00000048495	Tyw5	0.2335	2.65114	1.00804	0.315373	1
ENSMUSG00000028776	Tinagl1	-0.250141	4.02907	1.00801	0.315381	1
ENSMUSG00000023393	Slc17a9	-0.443139	3.13408	1.0078	0.315431	1
ENSMUSG00000054135	A430110L20Rik	-0.377662	0.186398	1.00752	0.315497	1
ENSMUSG00000028668	Eloa	0.250704	4.67884	1.00654	0.315734	1
ENSMUSG00000021193	Pitrm1	0.319872	4.35048	1.00644	0.315757	1
ENSMUSG00000036613	Eipr1	0.248601	2.89976	1.00631	0.315789	1
ENSMUSG00000038692	Hoxb4	-0.373943	0.558357	1.00607	0.315847	1
ENSMUSG00000072235	Tuba1a	0.352078	3.99325	1.00595	0.315875	1
ENSMUSG00000033220	Rac2	-0.30973	2.62124	1.0056	0.31596	1
ENSMUSG00000060376	Bckdha	0.33899	5.48076	1.00554	0.315973	1
ENSMUSG00000031478	Nek3	-0.352074	1.10647	1.00465	0.316187	1
ENSMUSG00000035757	Selenoo	0.250322	4.96773	1.00453	0.316216	1
ENSMUSG00000022102	Dok2	-0.328512	1.5368	1.00431	0.31627	1
ENSMUSG00000052562	Slc22a30	0.291656	7.94115	1.00388	0.316374	1
ENSMUSG00000074093	Svip	0.256344	3.9467	1.0038	0.316393	1
ENSMUSG00000028960	Ube4b	0.214197	5.13919	1.00338	0.316495	1
ENSMUSG00000046167	Gldn	-1.11824	-0.803834	1.00318	0.316542	1
ENSMUSG00000038425	Poli	-0.354954	2.66246	1.00256	0.316691	1
ENSMUSG00000014773	Dll1	0.339321	2.28574	1.00202	0.316823	1
ENSMUSG00000001665	Gstt3	0.380383	6.40485	1.00173	0.316892	1
ENSMUSG00000042328	Hps4	-0.265135	3.02476	1.00162	0.31692	1
ENSMUSG00000001419	Mef2d	-0.229376	4.42821	1.00139	0.316973	1
ENSMUSG00000037608	Bclaf1	-0.235658	5.65928	1.00081	0.317114	1
ENSMUSG00000078716	Tmem8b	0.288912	0.974153	1.00039	0.317217	1
ENSMUSG00000032548	Slco2a1	0.23932	5.7138	1.00008	0.317291	1
ENSMUSG00000040433	Zbtb38	0.243859	3.71685	1.00002	0.317306	1
ENSMUSG00000038538	Ubn2	-0.223194	5.08412	0.998471	0.317681	1
ENSMUSG00000063895	Nupl1	0.352999	2.87143	0.998324	0.317716	1
ENSMUSG00000005609	Ctr9	0.208299	4.31096	0.99791	0.317817	1
ENSMUSG00000038150	Ormdl3	0.215699	6.36483	0.997736	0.317859	1
ENSMUSG00000035649	Zcchc7	-0.302271	4.86185	0.997621	0.317887	1
ENSMUSG00000086231	Rapgef4os3	-0.386338	2.65285	0.997604	0.317891	1
ENSMUSG00000026349	Ccnt2	-0.220504	5.44512	0.99715	0.318001	1
ENSMUSG00000002103	Acp2	0.214072	5.48315	0.997116	0.318009	1
ENSMUSG00000031480	Thsd1	0.295228	1.81285	0.996887	0.318065	1
ENSMUSG00000032252	Glce	0.301238	4.45692	0.996836	0.318077	1
ENSMUSG00000024754	Cemip2	-0.24549	3.53635	0.996185	0.318235	1
ENSMUSG00000027651	Rprd1b	0.223711	4.49978	0.996182	0.318236	1
ENSMUSG00000086370	Ftx	-0.338007	2.39398	0.996007	0.318279	1
ENSMUSG00000023336	Wfdc1	-0.249849	2.27374	0.995913	0.318301	1
ENSMUSG00000025477	Inpp5a	0.232109	3.73023	0.995629	0.318371	1
ENSMUSG00000024247	Pkdcc	-0.317486	4.53456	0.995531	0.318394	1
ENSMUSG00000020074	Ccar1	-0.242229	5.22754	0.9954	0.318426	1
ENSMUSG00000041734	Kirrel	0.35777	0.261486	0.995357	0.318437	1
ENSMUSG00000032309	Fbxo22	0.198467	5.12858	0.995343	0.31844	1
ENSMUSG00000032066	Bco2	0.235195	4.02456	0.995004	0.318522	1
ENSMUSG00000026028	Trak2	0.202586	4.54407	0.994977	0.318529	1
ENSMUSG00000037344	Slc12a9	-0.355414	4.50873	0.994773	0.318579	1
ENSMUSG00000025001	Hells	-0.413813	1.08317	0.993874	0.318797	1
ENSMUSG00000030800	Prss8	0.343078	2.6152	0.993788	0.318818	1
ENSMUSG00000022680	Pdxdc1	0.246062	5.73985	0.993438	0.318904	1
ENSMUSG00000085133	B930095G15Rik	0.286029	1.30496	0.992696	0.319084	1
ENSMUSG00000028289	Epha7	0.313116	0.643549	0.991949	0.319267	1
ENSMUSG00000053332	Gas5	-0.267802	6.76287	0.991881	0.319283	1
ENSMUSG00000038366	Lasp1	0.252301	5.74497	0.991596	0.319353	1
ENSMUSG00000023176	Cpn2	0.232132	7.95576	0.991232	0.319442	1
ENSMUSG00000051427	Ccdc157	-0.215885	4.10579	0.990952	0.31951	1
ENSMUSG00000061232	H2-K1	-0.275702	10.2684	0.990031	0.319735	1
ENSMUSG00000107296	Gm43500	-0.389193	0.964691	0.990017	0.319738	1
ENSMUSG00000039967	Zfp292	-0.354048	4.46716	0.989867	0.319775	1
ENSMUSG00000040225	Prrc2c	-0.19192	5.50598	0.989778	0.319797	1
ENSMUSG00000053769	Lysmd1	-0.329108	1.55748	0.989636	0.319831	1
ENSMUSG00000054387	Mdm4	-0.254875	6.13644	0.989419	0.319884	1
ENSMUSG00000007603	Dus3l	-0.262974	3.78886	0.988711	0.320058	1
ENSMUSG00000018648	Dusp14	0.434351	0.257699	0.988564	0.320094	1
ENSMUSG00000035960	Apex1	0.358292	2.43408	0.98756	0.32034	1
ENSMUSG00000018651	Tada2a	-0.24061	2.67162	0.987309	0.320401	1
ENSMUSG00000022443	Myh9	0.261925	6.66634	0.986263	0.320658	1
ENSMUSG00000061356	Nuggc	-0.764434	0.869696	0.985458	0.320855	1
ENSMUSG00000032285	Dnaja4	0.435497	1.21323	0.985337	0.320885	1
ENSMUSG00000081788	Gm5898	0.30848	1.67996	0.985053	0.320955	1
ENSMUSG00000021252	Erg28	-0.225897	6.4968	0.985013	0.320964	1
ENSMUSG00000106133	Gm3724	0.32722	0.437268	0.98433	0.321132	1
ENSMUSG00000033021	Gmppa	-0.264233	4.8912	0.984314	0.321136	1
ENSMUSG00000063663	Brwd3	0.290525	2.96324	0.984013	0.32121	1
ENSMUSG00000029821	Gsdme	-0.218659	3.75376	0.983705	0.321286	1
ENSMUSG00000034681	Rnps1	-0.21905	4.03251	0.982528	0.321575	1
ENSMUSG00000028114	Mettl14	-0.233662	2.78067	0.982511	0.32158	1
ENSMUSG00000043487	Acot6	0.475383	-0.0666643	0.981787	0.321758	1
ENSMUSG00000060613	Cyp2c70	0.299706	9.67711	0.981558	0.321815	1
ENSMUSG00000107505	Stambp-ps1	0.55649	0.625046	0.980679	0.322031	1
ENSMUSG00000032235	Ice2	-0.217184	3.73194	0.980478	0.322081	1
ENSMUSG00000035948	Acss3	0.746302	3.40344	0.980244	0.322139	1
ENSMUSG00000040254	Sema3d	-0.447577	1.06935	0.979291	0.322374	1
ENSMUSG00000030109	Slc6a12	0.226734	6.36308	0.978511	0.322567	1
ENSMUSG00000014980	Tsen15	0.287748	2.72349	0.977996	0.322694	1
ENSMUSG00000027881	Prpf38b	-0.263802	5.44257	0.976876	0.322971	1
[truncated: 10,792 more rows]

## Sheet: mKO vs mWT
	matchname	logFC	logCPM	LR	PValue	FDR
ENSMUSG00000058216	Gstp3	5.27997	7.26323	202.279	6.64617e-46	8.50111e-42
ENSMUSG00000035448	Ccr3	-5.83577	1.05194	125.462	4.03304e-29	2.57933e-25
ENSMUSG00000040405	Havcr1	5.45601	-1.32145	72.0584	2.08918e-17	8.90755e-14
ENSMUSG00000047228	A2ml1	-3.12016	2.90167	60.8768	6.07601e-15	1.94295e-11
ENSMUSG00000050097	Ces2b	-4.75159	2.22644	59.8665	1.01517e-14	2.59701e-11
ENSMUSG00000055782	Abcd2	2.44775	4.73556	55.3152	1.02672e-13	2.18879e-10
ENSMUSG00000086962	Gm12248	4.1905	-1.14716	51.91	5.81041e-13	1.06173e-09
ENSMUSG00000081223	Gm12247	2.51285	1.43237	47.667	5.0511e-12	8.07608e-09
ENSMUSG00000032827	Ppp1r9a	1.55279	3.66543	46.4543	9.37808e-12	1.33283e-08
ENSMUSG00000071719	Tmem28	2.6413	0.24684	42.788	6.10038e-11	7.18438e-08
ENSMUSG00000026610	Esrrg	3.26309	1.44787	42.7632	6.17842e-11	7.18438e-08
ENSMUSG00000028755	Cda	-3.15909	2.22339	39.733	2.91168e-10	3.10361e-07
ENSMUSG00000029657	Hsph1	-1.89932	6.28915	37.6025	8.6735e-10	8.53406e-07
ENSMUSG00000049493	Pls1	-3.18934	0.617163	34.2677	4.80299e-09	4.38822e-06
ENSMUSG00000097762	4732463B04Rik	2.5535	2.48058	34.0376	5.40559e-09	4.60953e-06
ENSMUSG00000021228	Acot3	3.06569	6.85698	32.6429	1.10744e-08	8.57336e-06
ENSMUSG00000005268	Prlr	1.34171	7.59356	32.5875	1.13945e-08	8.57336e-06
ENSMUSG00000111864	Rpl26-ps6	-2.30053	0.0853092	30.8694	2.7599e-08	1.96122e-05
ENSMUSG00000090877	Hspa1b	-2.47854	4.1946	30.7172	2.98502e-08	1.99436e-05
ENSMUSG00000049685	Cyp2g1	2.11329	3.02882	30.549	3.25547e-08	1.99436e-05
ENSMUSG00000030364	Clec2h	-3.19918	0.640544	30.5378	3.2743e-08	1.99436e-05
ENSMUSG00000084309	Mup-ps20	-2.38631	2.42089	30.3814	3.54922e-08	2.06355e-05
ENSMUSG00000107838	Gm45769	-1.69008	2.47921	30.2192	3.85863e-08	2.1459e-05
ENSMUSG00000032115	Hyou1	-2.16673	7.26093	29.3015	6.19479e-08	3.30156e-05
ENSMUSG00000104785	Gm31121	2.5057	-1.2283	28.6606	8.62416e-08	4.41247e-05
ENSMUSG00000082896	Gm5844	-1.88766	3.12131	28.3492	1.01288e-07	4.98299e-05
ENSMUSG00000052407	Ccdc171	1.802	3.14767	27.6231	1.47408e-07	6.98332e-05
ENSMUSG00000028354	Fmn2	-2.27677	-0.869902	27.315	1.72867e-07	7.89692e-05
ENSMUSG00000022388	Ttll8	-2.42796	0.164364	25.8208	3.74626e-07	0.000165236
ENSMUSG00000074345	Tnfaip8l3	2.42285	0.18501	25.6877	4.0137e-07	0.000171131
ENSMUSG00000028860	Sytl1	-2.12619	2.03524	25.4593	4.51815e-07	0.000186425
ENSMUSG00000023272	Creld2	-3.75408	6.15625	25.3727	4.72567e-07	0.000188894
ENSMUSG00000035299	Mid1	-3.93487	3.7427	24.6305	6.94444e-07	0.000260245
ENSMUSG00000110569	Gm18860	1.6244	0.920338	24.609	7.02241e-07	0.000260245
ENSMUSG00000051579	Tceal8	-1.6717	3.38018	24.5821	7.12107e-07	0.000260245
ENSMUSG00000031824	6430548M08Rik	-1.96935	3.03216	24.4578	7.5955e-07	0.000269872
ENSMUSG00000087413	Gm11266	1.50653	2.13637	24.1657	8.83905e-07	0.000305568
ENSMUSG00000013629	Cad	-1.34823	3.57625	23.0993	1.53845e-06	0.00051785
ENSMUSG00000028211	Trp53inp1	1.03242	5.18045	23.0229	1.60081e-06	0.000525026
ENSMUSG00000081058	H3c15	-2.05127	1.09474	22.7625	1.83309e-06	0.000582013
ENSMUSG00000067149	Jchain	2.35776	1.27281	22.7287	1.86557e-06	0.000582013
ENSMUSG00000006711	D130043K22Rik	1.6143	2.87064	22.4419	2.16594e-06	0.000659633
ENSMUSG00000024937	Ehbp1l1	1.04997	3.32189	22.271	2.36759e-06	0.000704274
ENSMUSG00000048489	Depp1	2.72479	6.23235	22.1093	2.57565e-06	0.000748754
ENSMUSG00000076609	Igkc	2.22446	3.42453	22.0103	2.71186e-06	0.00077083
ENSMUSG00000032575	Manf	-2.23517	6.73896	21.8316	2.97662e-06	0.000820949
ENSMUSG00000100658	F730311O21Rik	-2.42506	-0.373496	21.806	3.01654e-06	0.000820949
ENSMUSG00000059873	Olfr1029	3.36132	-0.186968	21.6199	3.32378e-06	0.000885717
ENSMUSG00000029467	Atp2a2	-1.17201	7.07821	21.5427	3.46034e-06	0.00090329
ENSMUSG00000020600	Slc7a15	2.09354	-0.0558631	21.4642	3.60501e-06	0.000920099
ENSMUSG00000032456	Nmnat3	1.15223	2.86203	21.4306	3.6686e-06	0.000920099
ENSMUSG00000029822	Osbpl3	1.71363	0.923637	21.2067	4.12313e-06	0.00101421
ENSMUSG00000059325	Hopx	-1.07105	5.61587	21.1195	4.31516e-06	0.00104142
ENSMUSG00000057425	Ugt2b37	-1.38441	3.10387	21.0768	4.41243e-06	0.00104517
ENSMUSG00000030528	Blm	1.24065	2.57961	20.7952	5.11122e-06	0.00118868
ENSMUSG00000026688	Mgst3	1.03517	4.42228	20.4604	6.08771e-06	0.0013905
ENSMUSG00000021270	Hsp90aa1	-1.78194	7.39732	20.344	6.46951e-06	0.00145178
ENSMUSG00000031380	Vegfd	1.81777	0.143031	20.2864	6.66728e-06	0.00147037
ENSMUSG00000107951	Gm6210	-1.35184	1.53234	19.9795	7.82774e-06	0.00169703
ENSMUSG00000030870	Ubfd1	-1.09926	5.23178	19.7481	8.83477e-06	0.00188343
ENSMUSG00000043753	Dmrta1	2.73353	0.148858	19.5397	9.85331e-06	0.00204774
ENSMUSG00000021259	Cyp46a1	1.54283	2.89998	19.4954	1.00841e-05	0.00204774
ENSMUSG00000019916	P4ha1	-1.13456	3.70849	19.4951	1.00858e-05	0.00204774
ENSMUSG00000032353	Tmed3	-1.49453	4.61259	19.4568	1.02899e-05	0.00205654
ENSMUSG00000029772	Ahcyl2	-1.322	4.09894	19.4123	1.05328e-05	0.00207269
ENSMUSG00000032028	Nxpe2	0.967511	4.51602	19.1899	1.18335e-05	0.00224451
ENSMUSG00000020869	Lrrc59	-1.26351	5.62738	19.1747	1.19284e-05	0.00224451
ENSMUSG00000070284	Gmppb	-1.45752	4.06026	19.1504	1.20815e-05	0.00224451
ENSMUSG00000070332	Trim80	1.56884	1.79924	19.1462	1.21078e-05	0.00224451
ENSMUSG00000010601	Apol7a	1.32193	7.28962	19.1101	1.23389e-05	0.00225467
ENSMUSG00000052271	Bhlha15	-4.48242	0.832266	19.0243	1.29064e-05	0.00232516
ENSMUSG00000041351	Rap1gap	1.29975	3.16505	18.9915	1.31304e-05	0.00233266
ENSMUSG00000032064	Dixdc1	1.20151	3.90903	18.843	1.41933e-05	0.00248693
ENSMUSG00000040017	Saa4	-1.64072	8.63763	18.6273	1.58931e-05	0.00274714
ENSMUSG00000098702	1500015A07Rik	1.39104	1.13887	18.5434	1.66079e-05	0.00281965
ENSMUSG00000032553	Srprb	-1.23706	4.15783	18.5268	1.67534e-05	0.00281965
ENSMUSG00000062110	Scfd2	-1.11587	2.81869	18.4565	1.73826e-05	0.00288754
ENSMUSG00000095134	Mid1-ps1	-3.63429	1.11188	18.2979	1.88911e-05	0.00309789
ENSMUSG00000022948	Setd4	1.58573	4.03007	18.119	2.07517e-05	0.00335994
ENSMUSG00000009293	Ube2g2	-0.935793	4.90273	18.0682	2.13132e-05	0.00340771
ENSMUSG00000018171	Vmp1	-1.37269	7.05413	17.9926	2.21765e-05	0.00350196
ENSMUSG00000057074	Ces1g	1.12293	7.86849	17.9655	2.2495e-05	0.00350895
ENSMUSG00000029992	Gfpt1	-1.55207	4.57407	17.8761	2.35768e-05	0.00363339
ENSMUSG00000006442	Srm	-1.09732	5.08727	17.8229	2.42445e-05	0.00365762
ENSMUSG00000028715	Cyp4a14	2.47302	6.95039	17.8126	2.43758e-05	0.00365762
ENSMUSG00000024807	Syvn1	-2.38033	6.93874	17.7958	2.45919e-05	0.00365762
ENSMUSG00000089774	Slc5a3	-1.26507	2.70844	17.7624	2.50282e-05	0.00367972
ENSMUSG00000089736	Tgfbr3l	1.23452	1.91142	17.6984	2.5884e-05	0.0037623
ENSMUSG00000066072	Cyp4a10	1.97413	7.53207	17.6293	2.68422e-05	0.00385774
ENSMUSG00000037443	Cep85	-1.58217	5.2447	17.4686	2.921e-05	0.00415138
ENSMUSG00000027579	Srms	-2.01886	-0.20913	17.3252	3.14987e-05	0.00442748
ENSMUSG00000057069	Ero1lb	-1.21641	6.17218	17.2988	3.19386e-05	0.00444051
ENSMUSG00000039004	Bmp6	1.35141	1.68825	17.2629	3.25487e-05	0.00447667
ENSMUSG00000026864	Hspa5	-2.02329	9.62417	17.1669	3.42353e-05	0.00463691
ENSMUSG00000002083	Bbc3	1.13888	2.35507	17.1556	3.44388e-05	0.00463691
ENSMUSG00000041044	Lrit1	1.30563	3.77757	16.9821	3.7734e-05	0.00502766
ENSMUSG00000090622	A930033H14Rik	1.74513	3.49873	16.9093	3.92088e-05	0.00517031
ENSMUSG00000042851	Zc3h6	1.91143	0.301879	16.8832	3.97523e-05	0.00518849
ENSMUSG00000053841	Txlna	-1.10146	5.19346	16.8242	4.10075e-05	0.00529825
ENSMUSG00000027429	Sec23b	-1.22523	5.65709	16.7047	4.36726e-05	0.00558617
ENSMUSG00000052496	Pkdrej	1.68962	1.86513	16.6494	4.49647e-05	0.00569449
ENSMUSG00000023122	Sult1c2	1.34417	3.00297	16.5849	4.65201e-05	0.00577626
ENSMUSG00000110750	Gm48702	1.4578	0.25383	16.5819	4.65934e-05	0.00577626
ENSMUSG00000031271	Serpina7	1.4961	3.29729	16.5668	4.69652e-05	0.00577626
ENSMUSG00000025726	Slc28a1	2.31215	-0.391957	16.471	4.94004e-05	0.00601791
ENSMUSG00000070690	Albfm1	0.864387	4.97458	16.4176	5.08119e-05	0.00613146
ENSMUSG00000066153	Mup21	-1.4734	6.76985	16.2068	5.67901e-05	0.00678881
ENSMUSG00000097503	3110045C21Rik	1.59173	0.869277	16.1763	5.77122e-05	0.00681533
ENSMUSG00000046532	Ar	1.81562	4.10651	16.1643	5.80776e-05	0.00681533
ENSMUSG00000083899	Gm12346	-1.6297	3.91796	16.1415	5.87813e-05	0.00683519
ENSMUSG00000039474	Wfs1	-0.995112	3.20825	16.0444	6.18752e-05	0.00713014
ENSMUSG00000020037	Rfx4	1.81309	0.765726	16.0265	6.24617e-05	0.00713346
ENSMUSG00000029672	Fam3c	-0.842406	4.56153	15.9731	6.42482e-05	0.00727255
ENSMUSG00000022347	A1bg	-4.59678	9.21204	15.9486	6.50873e-05	0.00730291
ENSMUSG00000022769	Sdf2l1	-2.63719	4.54171	15.8644	6.80479e-05	0.00754252
ENSMUSG00000015656	Hspa8	-1.1011	10.2775	15.8433	6.88111e-05	0.00754252
ENSMUSG00000012428	Steap4	-1.29723	6.99014	15.8383	6.89919e-05	0.00754252
ENSMUSG00000021379	Id4	1.68016	-0.196341	15.7466	7.24169e-05	0.0077738
ENSMUSG00000025823	Pdia4	-1.70096	7.51871	15.7398	7.26772e-05	0.0077738
ENSMUSG00000043300	B3galnt1	-1.65654	0.17276	15.7261	7.32054e-05	0.0077738
ENSMUSG00000026535	Ifi202b	-9.10157	-1.00257	15.7176	7.35384e-05	0.0077738
ENSMUSG00000030207	Fam234b	-0.78475	4.39693	15.7006	7.42009e-05	0.00777953
ENSMUSG00000103560	Gm38070	-2.74885	1.9598	15.68	7.50144e-05	0.00780088
ENSMUSG00000075551	Cyp3a41a	-2.92099	7.89824	15.5989	7.82982e-05	0.00807672
ENSMUSG00000063696	Gm8730	-2.52857	3.95257	15.4984	8.25769e-05	0.00844496
ENSMUSG00000082908	Gm13736	-1.7801	3.02824	15.4844	8.31885e-05	0.00844496
ENSMUSG00000078949	R3hdml	1.92028	0.114837	15.4041	8.6802e-05	0.0087424
ENSMUSG00000076617	Ighm	2.87529	3.72754	15.3769	8.80561e-05	0.00879942
ENSMUSG00000040557	Mettl27	0.877544	3.30602	15.303	9.15718e-05	0.0090798
ENSMUSG00000028001	Fga	-0.973732	11.2855	15.184	9.75268e-05	0.00959589
ENSMUSG00000049922	Slc35c1	-0.814566	3.97871	15.1478	9.94144e-05	0.00970694
ENSMUSG00000015488	Cacfd1	-0.963893	5.25029	15.0472	0.000104857	0.0101608
ENSMUSG00000071652	Ints5	-0.820084	3.61561	14.9838	0.000108437	0.0104287
ENSMUSG00000048279	Sacs	-1.29321	1.70539	14.88	0.000114573	0.0109316
ENSMUSG00000023044	Csad	1.61942	7.22906	14.8668	0.000115375	0.0109316
ENSMUSG00000058056	Palld	-0.999059	5.54593	14.8041	0.000119277	0.0112182
ENSMUSG00000045193	Cirbp	1.16941	4.25841	14.7803	0.00012079	0.0112776
ENSMUSG00000043243	Fam129c	-2.27026	0.627322	14.6342	0.000130523	0.012098
ENSMUSG00000004880	Lbr	0.858377	3.40478	14.5416	0.000137098	0.0124975
ENSMUSG00000004951	Hspb1	-1.55625	3.52559	14.5369	0.000137438	0.0124975
ENSMUSG00000042745	Id1	2.51676	3.77978	14.5325	0.000137765	0.0124975
ENSMUSG00000019437	Tlcd1	0.863343	5.63486	14.4341	0.000145153	0.012993
ENSMUSG00000020553	Pctp	0.97889	6.35176	14.4182	0.00014638	0.012993
ENSMUSG00000022505	Emp2	1.5752	3.62764	14.4159	0.000146557	0.012993
ENSMUSG00000037470	Uggt1	-0.806109	6.10675	14.4065	0.00014729	0.012993
ENSMUSG00000085971	Gm15411	1.58969	0.0327229	14.3356	0.000152947	0.0133338
ENSMUSG00000029189	Sel1l3	-1.21447	3.90117	14.332	0.000153238	0.0133338
ENSMUSG00000110659	Gm45727	1.75082	1.5571	14.2048	0.000163952	0.0141127
ENSMUSG00000053113	Socs3	-1.87168	3.17976	14.1914	0.000165121	0.0141127
ENSMUSG00000018906	P4ha2	-0.874355	3.10998	14.1871	0.0001655	0.0141127
ENSMUSG00000037583	Nr0b2	1.62864	5.72567	14.1222	0.000171307	0.0145011
ENSMUSG00000104798	Gm20121	-3.45698	0.739337	14.1012	0.000173231	0.0145011
ENSMUSG00000053219	Raet1e	2.00261	2.37948	14.0988	0.000173456	0.0145011
ENSMUSG00000063704	Mapk15	1.28838	2.9019	14.0399	0.000178975	0.0148654
ENSMUSG00000106053	Gm20752	-9.061	-0.217037	14.0032	0.000182502	0.0150605
ENSMUSG00000031534	Smim19	0.779829	4.1069	13.9731	0.000185441	0.0152049
ENSMUSG00000108436	Gm44851	1.40003	1.5743	13.9152	0.000191244	0.0155809
ENSMUSG00000030795	Fus	0.742462	6.30289	13.7806	0.000205443	0.0166318
ENSMUSG00000032478	Nme6	-1.39481	4.10015	13.7132	0.000212957	0.0171305
ENSMUSG00000039234	Sec24d	-1.141	5.74176	13.7015	0.000214282	0.0171305
ENSMUSG00000052534	Pbx1	1.01125	3.81993	13.6866	0.000215995	0.0171602
ENSMUSG00000039286	Fndc3b	-1.55268	4.29502	13.667	0.000218254	0.0172326
ENSMUSG00000109262	Gm44744	1.44548	0.54844	13.6381	0.000221638	0.0173925
ENSMUSG00000058013	2020-09-11	-1.37421	3.3156	13.6123	0.000224707	0.0175258
ENSMUSG00000042638	Gucy2c	1.50442	0.4073	13.5545	0.000231737	0.0178711
ENSMUSG00000071856	Mcc	0.850099	4.49038	13.5529	0.000231929	0.0178711
ENSMUSG00000059708	Akap17b	-1.28351	2.93591	13.4325	0.000247301	0.0189415
ENSMUSG00000057228	Aadat	-0.833092	6.73772	13.386	0.000253504	0.0191005
ENSMUSG00000023393	Slc17a9	-1.6536	3.13408	13.3846	0.000253702	0.0191005
ENSMUSG00000025969	Nrp2	0.979137	4.12418	13.3834	0.000253857	0.0191005
ENSMUSG00000027800	Tm4sf1	0.970309	3.55309	13.3215	0.000262387	0.0196268
ENSMUSG00000031604	Msmo1	1.24657	7.78048	13.3104	0.000263937	0.019628
ENSMUSG00000021273	Fdft1	0.981774	7.05551	13.287	0.000267259	0.0197602
ENSMUSG00000032599	Ip6k2	1.05432	5.04387	13.2334	0.000275003	0.0202158
ENSMUSG00000107092	Gm7993	-2.15636	0.926418	13.2135	0.000277943	0.0203153
ENSMUSG00000038508	Gdf15	1.97223	1.34614	13.1622	0.000285649	0.0206451
ENSMUSG00000030329	Pianp	1.18334	1.39865	13.1555	0.00028667	0.0206451
ENSMUSG00000040272	Accs	1.06237	1.67899	13.1454	0.00028822	0.0206451
ENSMUSG00000020176	Grb10	-1.41038	2.29422	13.1409	0.000288912	0.0206451
ENSMUSG00000085189	Gm11963	-1.13951	0.937959	13.0602	0.000301644	0.0213318
ENSMUSG00000072963	Gm10447	1.65737	0.2962	13.0505	0.000303206	0.0213318
ENSMUSG00000030798	Cd37	1.18192	1.1572	13.0485	0.000303524	0.0213318
ENSMUSG00000018727	Cpsf4l	1.2018	3.16193	12.9117	0.000326535	0.0228235
ENSMUSG00000028525	Pde4b	1.41758	3.44234	12.884	0.00033141	0.0229976
ENSMUSG00000011179	Odc1	-0.750905	6.15597	12.8771	0.000332621	0.0229976
ENSMUSG00000028334	Nans	-0.950839	3.92916	12.7676	0.000352678	0.0242533
ENSMUSG00000023045	Soat2	0.9202	5.06894	12.7422	0.000357495	0.0244381
ENSMUSG00000110496	Gm45909	1.55856	2.99713	12.7334	0.000359187	0.0244381
ENSMUSG00000059824	Dbp	0.959034	5.7567	12.6478	0.000376005	0.025377
ENSMUSG00000039621	Prex1	1.28568	3.02036	12.6431	0.000376956	0.025377
ENSMUSG00000031379	Pir	0.799329	4.07716	12.5709	0.000391798	0.0261639
ENSMUSG00000019731	Slc35e1	-0.724253	5.27996	12.5664	0.000392735	0.0261639
ENSMUSG00000034522	Zfp395	0.9562	4.90065	12.5232	0.000401926	0.0266375
ENSMUSG00000055897	Ppp4r1l-ps	0.912786	3.72303	12.5027	0.000406365	0.0266564
ENSMUSG00000058569	Tmed9	-0.868962	6.17414	12.5026	0.000406379	0.0266564
ENSMUSG00000024589	Nedd4l	-1.04803	4.67171	12.4894	0.000409264	0.0267087
ENSMUSG00000020205	Phlda1	-2.06497	5.52347	12.4534	0.000417232	0.0268846
ENSMUSG00000052392	Acot4	1.27717	4.7813	12.4426	0.000419644	0.0268846
ENSMUSG00000043418	Lrit2	1.23046	2.85133	12.4417	0.000419864	0.0268846
ENSMUSG00000065952	C330021F23Rik	1.52599	1.27923	12.432	0.000422043	0.0268846
ENSMUSG00000025757	Hspa4l	-1.17237	4.39204	12.4301	0.00042247	0.0268846
ENSMUSG00000026353	Ubxn4	-0.852221	6.28395	12.3769	0.00043468	0.0275247
ENSMUSG00000087231	E230016M11Rik	1.17717	1.47695	12.3445	0.000442299	0.0278692
ENSMUSG00000036006	Ripor2	1.18874	0.853221	12.0845	0.000508434	0.0318793
ENSMUSG00000086389	Gm15998	1.82386	1.34194	12.0187	0.00052669	0.0328503
ENSMUSG00000039114	Nrn1	0.915921	8.35553	12.0104	0.000529056	0.0328503
ENSMUSG00000005483	Dnajb1	-0.911549	4.70903	11.9935	0.000533878	0.0328964
ENSMUSG00000028238	Atp6v0d2	1.24644	2.52262	11.9875	0.000535597	0.0328964
ENSMUSG00000020873	Slc35b1	-1.05099	5.71045	11.9731	0.000539729	0.0328964
ENSMUSG00000037406	Htra4	1.72148	0.386947	11.9719	0.000540086	0.0328964
ENSMUSG00000061947	Serpina10	-1.02254	7.89964	11.9168	0.00055631	0.033724
ENSMUSG00000003355	Fkbp11	-1.56475	4.0723	11.9038	0.000560208	0.0338001
ENSMUSG00000024966	Stip1	-0.906307	5.87549	11.8717	0.000569947	0.034177
ENSMUSG00000054277	Arfgap3	-1.51479	3.42605	11.8607	0.00057331	0.034177
ENSMUSG00000095079	Igha	1.99002	0.274584	11.8569	0.000574471	0.034177
ENSMUSG00000029309	Sparcl1	1.21639	1.78962	11.8448	0.000578224	0.0342411
ENSMUSG00000094156	Sult2a7	1.92554	5.5296	11.8293	0.000583045	0.0343674
ENSMUSG00000030131	Mug2	1.30666	6.74022	11.8192	0.000586235	0.0343969
ENSMUSG00000085211	B430219N15Rik	-2.71716	0.731499	11.7977	0.000593036	0.0346371
ENSMUSG00000064179	Tnnt1	1.44038	0.23812	11.7733	0.000600857	0.0347331
ENSMUSG00000022136	Dnajc3	-0.958189	7.76309	11.7726	0.000601102	0.0347331
ENSMUSG00000040724	Kcna2	1.0442	1.82008	11.7672	0.000602826	0.0347331
ENSMUSG00000031712	Il15	1.08716	1.25168	11.7236	0.000617138	0.0353982
ENSMUSG00000036027	1810046K07Rik	2.37211	0.788073	11.713	0.000620647	0.035409
ENSMUSG00000038503	Mesd	-0.761212	4.54056	11.7064	0.000622861	0.035409
ENSMUSG00000004552	Ctse	1.55566	3.48877	11.6864	0.000629594	0.0355838
ENSMUSG00000060560	Ces4a	-2.25096	1.46407	11.674	0.000633791	0.0355838
ENSMUSG00000012123	Crybg2	2.05553	2.40983	11.6707	0.000634936	0.0355838
ENSMUSG00000096740	Lbhd1	-1.21915	2.01064	11.6644	0.000637064	0.0355838
ENSMUSG00000024664	Fads3	1.09919	4.28546	11.6432	0.000644386	0.0358362
ENSMUSG00000044349	Snhg11	1.4296	4.36002	11.6285	0.000649496	0.0358642
ENSMUSG00000025375	Aatk	1.05329	2.85538	11.6256	0.000650496	0.0358642
ENSMUSG00000021057	Akap5	1.28195	0.577253	11.5983	0.00066011	0.0362066
ENSMUSG00000020288	Ahsa2	-0.745902	4.51339	11.592	0.000662368	0.0362066
ENSMUSG00000084159	Gm12696	-0.859869	2.285	11.57	0.000670226	0.0364803
ENSMUSG00000032508	Myd88	-0.741773	3.82296	11.525	0.000686671	0.0371925
ENSMUSG00000038060	Dlec1	2.34761	1.73618	11.5176	0.000689395	0.0371925
ENSMUSG00000062797	Hikeshi	-0.723705	3.9082	11.5088	0.000692691	0.0371925
ENSMUSG00000039236	Isg20	-1.14014	1.5157	11.5027	0.000694942	0.0371925
ENSMUSG00000085990	Gm16731	-2.713	1.52823	11.4681	0.000708024	0.0377347
ENSMUSG00000020576	Nbas	-0.840784	4.01096	11.4527	0.0007139	0.03789
ENSMUSG00000109511	Nup62	-0.77881	3.65657	11.3827	0.000741301	0.0391074
ENSMUSG00000071042	Rasgrp3	0.855959	2.46923	11.3786	0.000742951	0.0391074
ENSMUSG00000027935	Rab13	0.931826	2.09805	11.3612	0.000749962	0.0393146
ENSMUSG00000092471	Cyp21a2-ps	-1.74126	3.15059	11.3476	0.000755464	0.0393695
ENSMUSG00000098678	Mroh6	-1.88006	1.16288	11.3434	0.000757164	0.0393695
ENSMUSG00000001774	Chordc1	-0.97402	5.51034	11.3313	0.000762134	0.0394674
ENSMUSG00000093458	Gm20688	1.66417	-0.0105263	11.2956	0.0007769	0.0400699
ENSMUSG00000032932	Hspa13	-1.32494	4.88502	11.2811	0.000782995	0.040222
ENSMUSG00000076612	Ighg2c	3.05489	0.743381	11.2593	0.000792258	0.0405351
ENSMUSG00000110298	Gm8189	1.33684	1.68196	11.2274	0.000805971	0.0410724
ENSMUSG00000026126	Ptpn18	1.25996	0.466217	11.1243	0.000852059	0.0432488
ENSMUSG00000004460	Dnajb11	-1.16004	6.25193	11.0537	0.000885098	0.0447482
ENSMUSG00000022215	Fitm1	1.1267	3.7127	11.028	0.000897479	0.0450673
ENSMUSG00000097785	B230217O12Rik	1.51228	0.835253	11.0259	0.000898457	0.0450673
ENSMUSG00000020964	Sel1l	-0.927207	6.96637	10.9366	0.000942845	0.0471091
ENSMUSG00000022844	Pdia5	-0.765465	6.13569	10.9027	0.00096026	0.0477926
ENSMUSG00000020038	Cry1	-0.875603	3.60869	10.8239	0.00100197	0.0494925
ENSMUSG00000035845	Alg12	-1.00823	3.0682	10.8236	0.00100216	0.0494925
ENSMUSG00000025192	Entpd7	-1.33004	1.49279	10.8078	0.00101071	0.0497231
ENSMUSG00000022620	Arsa	0.728355	4.21675	10.7984	0.00101591	0.0497872
ENSMUSG00000030827	Fgf21	1.81458	-0.22039	10.7679	0.00103276	0.0504199
ENSMUSG00000032902	Slc16a1	-0.808057	5.29506	10.7399	0.00104848	0.0509929
ENSMUSG00000006395	Hyi	0.739248	5.87557	10.685	0.00108009	0.0522169
ENSMUSG00000109841	E330011O21Rik	1.22579	1.77513	10.682	0.00108181	0.0522169
ENSMUSG00000031489	Adrb3	1.52368	2.46278	10.6483	0.00110171	0.0529776
ENSMUSG00000072568	Lratd2	-0.955345	3.55056	10.6222	0.00111741	0.053531
ENSMUSG00000055116	Arntl	-1.34784	0.940174	10.529	0.00117513	0.0560862
ENSMUSG00000020571	Pdia6	-0.938208	7.83261	10.5188	0.00118169	0.0561282
ENSMUSG00000030031	Kbtbd8	-1.31635	1.31671	10.5081	0.00118853	0.0561282
ENSMUSG00000005667	Mthfd2	-1.02773	0.403397	10.503	0.00119183	0.0561282
ENSMUSG00000022537	Tmem44	1.01799	1.16873	10.4981	0.00119495	0.0561282
ENSMUSG00000030257	Srgap3	1.83131	0.272915	10.4935	0.00119795	0.0561282
ENSMUSG00000074476	Spc24	0.815841	3.98805	10.4737	0.00121086	0.056526
ENSMUSG00000004462	Tbccd1	-0.770088	4.64271	10.4586	0.00122078	0.056782
ENSMUSG00000076613	Ighg2b	2.57048	1.47075	10.4419	0.00123191	0.0569215
ENSMUSG00000060613	Cyp2c70	-0.98553	9.67711	10.434	0.00123717	0.0569215
ENSMUSG00000032808	Cyp2c38	1.2723	6.24577	10.429	0.00124052	0.0569215
ENSMUSG00000070811	Sult2a2	-5.81044	5.81443	10.4274	0.00124158	0.0569215
ENSMUSG00000059540	Tcea2	1.16314	0.134061	10.3972	0.00126207	0.0576541
ENSMUSG00000013236	Ptprs	1.02007	1.90454	10.3456	0.00129785	0.0590774
ENSMUSG00000031861	Lpar2	1.37843	0.394503	10.3218	0.00131468	0.0596314
ENSMUSG00000000489	Pdgfb	1.19739	0.117235	10.3039	0.00132751	0.0600004
ENSMUSG00000005374	Tbl2	-0.642516	4.42101	10.2727	0.00135012	0.0606722
ENSMUSG00000057614	Gnai1	1.2021	-0.145263	10.2703	0.00135186	0.0606722
ENSMUSG00000020484	Xbp1	-0.869576	8.03126	10.2552	0.00136303	0.0609575
ENSMUSG00000044734	Serpinb1a	1.5687	2.89628	10.2488	0.00136774	0.0609575
ENSMUSG00000001103	Sebox	-1.44182	-0.253796	10.2247	0.0013857	0.0615432
ENSMUSG00000060441	Trim5	1.0879	1.26591	10.2147	0.00139325	0.061569
ENSMUSG00000046167	Gldn	2.45309	-0.803834	10.2112	0.00139591	0.061569
ENSMUSG00000068114	Ccdc134	-1.5162	2.50373	10.1667	0.00142999	0.0628558
ENSMUSG00000025422	Agap2	-1.44915	0.26777	10.1527	0.00144091	0.0631187
ENSMUSG00000039745	Htatip2	0.637974	4.81168	10.1381	0.00145233	0.0634019
ENSMUSG00000022831	Hcls1	0.989178	2.48816	10.1005	0.00148226	0.0644883
ENSMUSG00000021266	Wars	-0.883872	4.02117	10.0731	0.00150454	0.0649364
ENSMUSG00000021094	Dhrs7	0.609601	5.49097	10.0729	0.00150468	0.0649364
ENSMUSG00000045752	Tssc4	-0.823049	3.77107	10.0611	0.00151436	0.0649364
ENSMUSG00000059970	Hspa2	1.02049	1.81399	10.0605	0.00151483	0.0649364
ENSMUSG00000106889	Gm7463	0.993451	3.34836	10.0567	0.00151794	0.0649364
ENSMUSG00000034591	Slc41a2	-1.85794	4.4144	10.0349	0.00153604	0.0652805
ENSMUSG00000069601	Ank3	0.789486	3.11125	10.0304	0.00153977	0.0652805
ENSMUSG00000058897	Col25a1	2.47954	-0.062312	10.026	0.00154346	0.0652805
ENSMUSG00000043019	Edem3	-0.845541	4.8929	10.0225	0.0015464	0.0652805
ENSMUSG00000028251	Tstd3	0.726862	4.077	9.95401	0.001605	0.067282
ENSMUSG00000097715	Gpr137b-ps	-2.40804	1.58896	9.95307	0.00160582	0.067282
ENSMUSG00000029186	Pi4k2b	-0.698204	5.08706	9.94874	0.00160959	0.067282
ENSMUSG00000039735	Fnbp1l	-0.801912	4.17414	9.91424	0.00164004	0.0680058
ENSMUSG00000020182	Ddc	-1.25513	4.8944	9.90357	0.00164959	0.0680058
ENSMUSG00000023944	Hsp90ab1	-0.814317	9.06074	9.89878	0.00165388	0.0680058
ENSMUSG00000028957	Per3	0.611618	6.30756	9.8987	0.00165395	0.0680058
ENSMUSG00000059479	B3gnt8	1.00873	1.70486	9.89858	0.00165407	0.0680058
ENSMUSG00000025920	Stau2	1.00366	2.1961	9.89331	0.00165881	0.0680058
ENSMUSG00000063558	Aox1	0.782151	6.25902	9.87454	0.00167581	0.0684834
ENSMUSG00000020846	Rflnb	1.1748	-0.0798761	9.85897	0.00169006	0.0688456
ENSMUSG00000032091	Tmprss4	-2.54244	0.133715	9.82642	0.00172023	0.0695672
ENSMUSG00000035941	Ibtk	-0.81039	5.57933	9.81949	0.00172673	0.0695672
ENSMUSG00000047746	Fbxo40	1.33142	0.0782732	9.80837	0.00173719	0.0695672
ENSMUSG00000027808	Serp1	-0.86193	8.112	9.80598	0.00173945	0.0695672
ENSMUSG00000033318	Gstt2	1.01709	6.85471	9.80584	0.00173959	0.0695672
ENSMUSG00000024165	Jpt2	-0.980004	4.34248	9.80497	0.0017404	0.0695672
ENSMUSG00000048578	Mlec	-0.91901	6.68254	9.77308	0.00177085	0.0705637
ENSMUSG00000033684	Qsox1	-0.797463	8.34961	9.7564	0.001787	0.0709859
ENSMUSG00000025512	Chid1	-0.798777	4.84882	9.73888	0.00180411	0.0714437
ENSMUSG00000003814	Calr	-0.934947	9.13301	9.72838	0.00181444	0.0716313
ENSMUSG00000063354	Slc39a4	-1.1542	5.40584	9.71264	0.00183005	0.072025
ENSMUSG00000006705	Pknox1	-0.662546	3.45718	9.69631	0.00184639	0.0724452
ENSMUSG00000110597	Gm8798	1.5646	0.64058	9.67034	0.00187267	0.0732517
ENSMUSG00000053553	3110082I17Rik	-1.16885	2.13142	9.66134	0.00188186	0.0732628
ENSMUSG00000024827	Gldc	-0.869035	6.14979	9.65886	0.00188441	0.0732628
ENSMUSG00000021091	Serpina3n	-0.985428	8.66706	9.65133	0.00189215	0.0733408
ENSMUSG00000102059	Gm20257	-1.09683	1.04722	9.62905	0.00191524	0.0740115
ENSMUSG00000024983	Vti1a	0.909203	2.75659	9.59507	0.001951	0.0750547
ENSMUSG00000109674	Gm45470	1.21639	1.93407	9.59228	0.00195397	0.0750547
ENSMUSG00000027796	Smad9	1.3605	3.82699	9.57523	0.0019722	0.075393
ENSMUSG00000040139	9430038I01Rik	0.840746	2.81348	9.57303	0.00197456	0.075393
ENSMUSG00000023284	Zfp605	-1.65084	1.4172	9.5633	0.00198506	0.0755681
ENSMUSG00000021226	Acot2	1.09121	2.23722	9.54617	0.00200367	0.0760504
ENSMUSG00000027562	Car2	-0.86535	2.52109	9.53676	0.00201397	0.0762149
ENSMUSG00000018401	Mtmr4	-0.832498	5.43161	9.50458	0.00204959	0.0773343
ENSMUSG00000030082	Sec61a1	-0.778121	6.62609	9.47853	0.00207891	0.0782097
ENSMUSG00000053168	9030619P08Rik	-1.02718	5.77819	9.46423	0.00209517	0.0785904
ENSMUSG00000022181	C6	-0.721796	7.4012	9.45528	0.00210542	0.0787439
ENSMUSG00000031274	Col4a5	-1.60611	0.394937	9.43846	0.00212482	0.0791213
ENSMUSG00000033831	Fgb	-0.795729	11.4207	9.43582	0.00212788	0.0791213
ENSMUSG00000039809	Gabbr2	0.993489	4.07645	9.42833	0.00213658	0.0792146
ENSMUSG00000042549	Map2k3os	-0.998372	0.356821	9.41768	0.00214903	0.0794459
ENSMUSG00000024544	Ldlrad4	1.28223	1.82768	9.40153	0.00216804	0.0799176
ENSMUSG00000027933	Ints3	-0.714762	4.47506	9.39494	0.00217585	0.0799749
ENSMUSG00000021838	Samd4	0.917872	0.740477	9.38123	0.00219219	0.0800858
ENSMUSG00000068877	Selenbp2	-1.28222	10.1515	9.37626	0.00219814	0.0800858
ENSMUSG00000026670	Uap1	-0.716772	5.30494	9.37448	0.00220027	0.0800858
ENSMUSG00000022883	Robo1	1.32664	2.10673	9.36697	0.00220931	0.0800858
ENSMUSG00000069769	Msi2	0.726553	3.42596	9.36625	0.00221017	0.0800858
ENSMUSG00000025077	Dclre1a	0.798965	4.52672	9.33746	0.00224516	0.0811239
ENSMUSG00000041261	Car8	0.713114	6.03464	9.32649	0.00225865	0.0813813
ENSMUSG00000047798	Cd300lf	1.26645	0.212767	9.28414	0.00231146	0.0830503
ENSMUSG00000033860	Fgg	-0.803115	11.1835	9.26746	0.00233261	0.0834893
ENSMUSG00000037432	Fer1l5	-0.987849	1.60973	9.26422	0.00233673	0.0834893
ENSMUSG00000059327	Eda	1.04462	0.337108	9.23482	0.00237456	0.0845218
ENSMUSG00000030659	Nucb2	-1.9677	1.96635	9.23151	0.00237885	0.0845218
ENSMUSG00000093930	Hmgcs1	1.48466	7.52829	9.16356	0.00246882	0.0873234
ENSMUSG00000037826	Ppm1k	0.783065	6.00264	9.1598	0.0024739	0.0873234
ENSMUSG00000028641	P3h1	-0.862228	3.77271	9.15664	0.00247818	0.0873234
ENSMUSG00000026343	Gpr39	1.27287	0.686563	9.12881	0.00251615	0.0882565
ENSMUSG00000014905	Dnajb9	-1.34154	6.00982	9.12713	0.00251846	0.0882565
ENSMUSG00000027577	Chrna4	3.23038	3.51379	9.11085	0.00254098	0.0884043
ENSMUSG00000007646	Rad51c	-1.42912	-0.498531	9.11084	0.00254099	0.0884043
ENSMUSG00000030036	Mogs	-0.638024	5.38458	9.1091	0.00254341	0.0884043
ENSMUSG00000026519	Tmem63a	0.712914	3.95735	9.0842	0.00257828	0.088983
ENSMUSG00000055862	Izumo4	0.843097	3.73384	9.0827	0.00258039	0.088983
ENSMUSG00000010110	Stx5a	-0.966933	6.15293	9.08232	0.00258093	0.088983
ENSMUSG00000019577	Pdk4	1.16104	1.91943	9.05905	0.00261398	0.0898801
ENSMUSG00000029552	Tes	-1.887	1.10152	9.04944	0.00262776	0.0900226
ENSMUSG00000059022	Kcp	1.04554	3.12821	9.03249	0.00265223	0.0900226
ENSMUSG00000047150	1700001C19Rik	0.851831	3.11229	9.03124	0.00265404	0.0900226
ENSMUSG00000028789	Azin2	1.55447	1.28147	9.02939	0.00265674	0.0900226
ENSMUSG00000020482	Ccdc117	-0.609471	4.76413	9.02763	0.00265928	0.0900226
ENSMUSG00000015224	Cyp2j9	1.29919	3.82965	9.0269	0.00266035	0.0900226
ENSMUSG00000101517	4732465J04Rik	-0.599778	4.51196	9.01784	0.00267357	0.0902313
ENSMUSG00000041084	Ostc	-0.992631	5.63841	9.00367	0.00269437	0.0905982
ENSMUSG00000003849	Nqo1	1.10866	2.99884	9.0008	0.00269861	0.0905982
ENSMUSG00000024856	Cdk2ap2	-0.783268	5.56363	8.97779	0.00273281	0.0914412
ENSMUSG00000041550	Serpina5	-2.79219	-0.546784	8.97431	0.00273802	0.0914412
ENSMUSG00000050965	Prkca	0.882088	2.80863	8.96205	0.00275646	0.0918174
ENSMUSG00000087404	Gm11752	1.75961	0.426695	8.94842	0.0027771	0.0922647
ENSMUSG00000070565	Rasal2	-0.984442	3.86365	8.94344	0.00278467	0.0922766
ENSMUSG00000033021	Gmppa	-0.801058	4.8912	8.92819	0.00280803	0.0928101
ENSMUSG00000044548	Dact1	-1.03064	1.74793	8.86515	0.00290667	0.0958227
ENSMUSG00000038147	Cd84	0.919557	2.21482	8.83649	0.00295267	0.0968698
ENSMUSG00000010651	Acaa1b	0.993947	9.67107	8.83098	0.00296159	0.0968698
ENSMUSG00000087439	Gm15788	0.945044	1.05933	8.82942	0.00296412	0.0968698
ENSMUSG00000087132	A930001C03Rik	1.15674	-0.242473	8.82659	0.00296873	0.0968698
ENSMUSG00000031596	Slc7a2	0.845722	8.19988	8.82172	0.00297666	0.0968816
ENSMUSG00000090272	Mndal	1.21014	3.31168	8.80864	0.00299808	0.0971564
ENSMUSG00000050541	Adra1b	0.953556	5.73417	8.80729	0.0030003	0.0971564
ENSMUSG00000064264	Zfp428	-1.20522	0.134352	8.79343	0.00302317	0.0975838
ENSMUSG00000002345	Borcs8	-0.675326	3.80288	8.79007	0.00302875	0.0975838
ENSMUSG00000045790	Ccdc149	-1.86981	1.69407	8.77422	0.00305518	0.098188
ENSMUSG00000078495	Zfp984	-1.61816	0.429505	8.76685	0.00306756	0.0983386
ENSMUSG00000014226	Cacybp	-0.646817	4.92702	8.72937	0.00313125	0.10001
ENSMUSG00000002910	Arrdc2	1.76429	4.46314	8.72699	0.00313534	0.10001
ENSMUSG00000041920	Slc16a6	-1.35072	2.53658	8.71573	0.00315477	0.10012
ENSMUSG00000047238	Mageh1	-0.985196	1.1628	8.71353	0.00315857	0.10012
ENSMUSG00000000303	Cdh1	-0.828666	4.24484	8.7114	0.00316227	0.10012
ENSMUSG00000021037	Ahsa1	-0.641444	6.40929	8.65533	0.00326105	0.102865
ENSMUSG00000046351	Zfp322a	-0.630416	3.5945	8.65311	0.00326503	0.102865
ENSMUSG00000066361	Serpina3c	-4.80818	4.90217	8.64473	0.00328009	0.103085
ENSMUSG00000050854	Tmem125	-0.804426	2.56702	8.63534	0.00329704	0.103364
ENSMUSG00000029591	Ung	-1.20845	2.89738	8.6067	0.00334929	0.104745
ENSMUSG00000036083	Slc17a3	-0.660149	6.46282	8.60008	0.00336149	0.104785
ENSMUSG00000030223	Ptpro	1.40895	-0.517455	8.59664	0.00336783	0.104785
ENSMUSG00000029016	Clcn6	0.847361	2.33541	8.59269	0.00337515	0.104785
ENSMUSG00000024899	Papss2	0.779209	8.00041	8.58556	0.00338839	0.104875
ENSMUSG00000104528	Gm43314	1.27729	2.94833	8.58195	0.00339511	0.104875
ENSMUSG00000062861	Zfp28	1.13762	1.12938	8.57792	0.00340264	0.104875
ENSMUSG00000051669	AU021092	1.13299	1.24457	8.55701	0.00344193	0.105788
ENSMUSG00000078439	Smim24	1.15817	-0.0868732	8.55339	0.00344879	0.105788
ENSMUSG00000109482	Gm4756	0.817327	5.84284	8.53748	0.00347906	0.106309
ENSMUSG00000043998	Mgat2	-0.82125	5.46286	8.53331	0.00348705	0.106309
ENSMUSG00000107225	Gm43637	1.02241	0.767399	8.53139	0.00349072	0.106309
ENSMUSG00000072944	Nup62cl	1.63678	1.45334	8.50476	0.00354218	0.10762
ENSMUSG00000066456	Hmgn3	1.25977	-0.2663	8.48922	0.00357257	0.108052
ENSMUSG00000024597	Slc12a2	-0.654664	3.17994	8.48809	0.00357479	0.108052
ENSMUSG00000032540	Abhd5	-0.921705	4.39796	8.48455	0.00358174	0.108052
ENSMUSG00000027248	Pdia3	-0.937871	8.51293	8.47974	0.00359123	0.108083
ENSMUSG00000035572	Dcaf10	-0.692972	4.4464	8.46392	0.00362261	0.108772
ENSMUSG00000027952	Pmvk	1.24076	5.78263	8.45468	0.00364105	0.10899
ENSMUSG00000035270	Impg2	1.36706	1.66541	8.45175	0.00364693	0.10899
ENSMUSG00000038370	Pcp4l1	-1.44017	4.21981	8.41611	0.0037191	0.110888
ENSMUSG00000038828	Tmem214	-0.69215	6.00426	8.38051	0.00379265	0.112818
ENSMUSG00000078798	Sult2a1	-3.76237	6.88948	8.35311	0.00385027	0.114266
ENSMUSG00000012117	Dhdds	-0.763997	4.48032	8.32835	0.00390312	0.115567
ENSMUSG00000085404	Gm12909	1.00333	3.05298	8.3143	0.00393342	0.116106
ENSMUSG00000106030	Gm43611	1.45332	2.43223	8.31149	0.0039395	0.116106
ENSMUSG00000030306	Tmtc1	0.970684	0.557946	8.29632	0.00397254	0.116811
ENSMUSG00000108207	1810059H22Rik	0.885784	2.44537	8.26801	0.00403497	0.118375
ENSMUSG00000041075	Fzd7	-0.87456	4.00402	8.25877	0.00405557	0.118707
ENSMUSG00000029238	Clock	-0.708432	4.41665	8.2469	0.00408217	0.118708
ENSMUSG00000041355	Ssr2	-0.636391	6.29561	8.24676	0.00408248	0.118708
ENSMUSG00000035049	Rrp12	-0.729637	3.25753	8.24633	0.00408345	0.118708
ENSMUSG00000035181	Heatr5a	-0.728635	3.48745	8.23393	0.00411144	0.119029
ENSMUSG00000036743	Psma8	1.54426	0.251372	8.2332	0.0041131	0.119029
ENSMUSG00000004698	Hdac9	1.29397	-0.111677	8.22701	0.00412716	0.119166
ENSMUSG00000031422	Morf4l2	-1.00348	6.51922	8.2148	0.004155	0.1197
ENSMUSG00000020780	Srp68	-0.64194	5.56756	8.20469	0.00417822	0.120098
ENSMUSG00000022763	Aifm3	0.833372	2.38069	8.19667	0.00419673	0.12036
ENSMUSG00000031381	Piga	-1.25268	2.94905	8.15053	0.00430485	0.122982
ENSMUSG00000100094	1810008I18Rik	1.48033	5.83009	8.14946	0.0043074	0.122982
ENSMUSG00000085148	Mir22hg	0.870283	5.60351	8.14419	0.00431994	0.123065
ENSMUSG00000041471	Shld2	-0.830669	5.14615	8.13792	0.00433491	0.123217
ENSMUSG00000022025	Cnmd	0.985868	3.29448	8.10528	0.00441365	0.125105
ENSMUSG00000042426	Dhx29	-0.836536	3.31395	8.09881	0.00442944	0.125105
ENSMUSG00000001143	Lman2l	-0.689304	3.71218	8.09773	0.00443208	0.125105
ENSMUSG00000044442	N6amt1	0.684356	2.82074	8.09431	0.00444044	0.125105
ENSMUSG00000021903	Galnt15	0.985599	1.08315	8.0775	0.00448182	0.125891
ENSMUSG00000025724	Sec11a	-0.729752	5.70544	8.07357	0.00449155	0.125891
ENSMUSG00000085977	Gm5970	0.874365	2.30708	8.06716	0.00450748	0.125891
ENSMUSG00000034343	Ube2f	-0.59857	5.45486	8.0647	0.00451359	0.125891
ENSMUSG00000026117	Zap70	0.823015	4.16171	8.06312	0.00451754	0.125891
ENSMUSG00000087141	Plcxd2	-0.882108	6.427	8.05845	0.0045292	0.125941
ENSMUSG00000026475	Rgs16	1.27294	6.64253	8.04974	0.00455102	0.126274
ENSMUSG00000026833	Olfm1	0.994737	1.77135	8.03428	0.00459003	0.12708
ENSMUSG00000002017	Fam98a	-0.659456	4.84333	8.0284	0.00460494	0.127218
ENSMUSG00000032360	Hcrtr2	-1.33955	-0.825331	8.02295	0.00461882	0.127326
ENSMUSG00000042436	Mfap4	-1.28395	0.335355	8.0175	0.00463274	0.127435
ENSMUSG00000030718	Ppme1	-0.557292	4.45825	8.0057	0.00466303	0.127993
ENSMUSG00000035227	Spcs2	-0.748971	6.46466	8.00026	0.00467707	0.12805
ENSMUSG00000102982	Gm38319	1.08347	0.807982	7.99714	0.00468514	0.12805
ENSMUSG00000046179	E2f8	-1.83673	2.74942	7.99023	0.00470304	0.12818
ENSMUSG00000093798	Gm8355	-0.985728	4.00995	7.9854	0.0047156	0.12818
ENSMUSG00000095385	D630033O11Rik	1.10523	0.994236	7.98374	0.00471993	0.12818
ENSMUSG00000027176	Cstf3	-0.764582	3.87023	7.97172	0.00475137	0.12876
ENSMUSG00000022346	Myc	-2.94552	3.06678	7.95722	0.00478958	0.129231
ENSMUSG00000028893	Sesn2	0.926675	3.0018	7.95546	0.00479426	0.129231
ENSMUSG00000025936	Gm4956	-2.4469	3.44493	7.95365	0.00479905	0.129231
ENSMUSG00000054545	Ugt1a6a	0.75774	4.42294	7.93947	0.0048368	0.129974
ENSMUSG00000041119	Pde9a	-0.854536	3.4647	7.92925	0.0048642	0.130436
ENSMUSG00000053334	Ficd	-0.833933	3.12952	7.91437	0.00490437	0.131198
ENSMUSG00000053925	Gm9929	1.02533	0.506044	7.90581	0.00492763	0.131198
ENSMUSG00000024687	Osbp	-0.70809	5.59147	7.90429	0.00493178	0.131198
ENSMUSG00000030058	Copg1	-0.680475	6.11697	7.9036	0.00493366	0.131198
ENSMUSG00000090298	Sult3a2	-5.13778	4.5519	7.89214	0.004965	0.131493
ENSMUSG00000060044	Tmem26	0.991406	0.403547	7.89203	0.00496531	0.131493
ENSMUSG00000107994	D830050J10Rik	1.13773	0.179832	7.88548	0.00498332	0.131614
ENSMUSG00000007655	Cav1	0.876238	1.75488	7.88274	0.00499088	0.131614
ENSMUSG00000020718	Polg2	0.727503	3.31612	7.87918	0.00500072	0.131614
ENSMUSG00000041895	Wipi1	-0.569469	3.75895	7.8736	0.00501616	0.13167
ENSMUSG00000022757	Tfg	-0.676226	5.70095	7.86703	0.00503442	0.13167
ENSMUSG00000024479	Mal2	-0.71494	5.64243	7.86289	0.00504596	0.13167
ENSMUSG00000040297	Suco	-0.933892	4.07915	7.85803	0.00505954	0.13167
ENSMUSG00000021252	Erg28	0.641765	6.4968	7.85759	0.00506079	0.13167
ENSMUSG00000061959	Ces1e	0.870087	7.26766	7.85621	0.00506464	0.13167
ENSMUSG00000033618	Map3k13	-0.76053	2.93839	7.84371	0.00509979	0.132315
ENSMUSG00000024594	Prrc1	-0.626537	4.76249	7.83413	0.00512689	0.132695
ENSMUSG00000017679	Ttpal	-0.715551	4.47593	7.83121	0.00513517	0.132695
ENSMUSG00000032123	Dpagt1	-0.566858	5.02795	7.81478	0.00518205	0.133636
ENSMUSG00000039801	Cplane1	0.909603	2.18017	7.80234	0.00521787	0.133818
ENSMUSG00000052435	Cebpe	0.928426	2.07181	7.80203	0.00521874	0.133818
ENSMUSG00000104253	Gm37174	0.948432	0.571626	7.79657	0.00523454	0.133818
ENSMUSG00000000568	Hnrnpd	0.641193	5.21998	7.79526	0.00523836	0.133818
ENSMUSG00000017764	Zswim1	-0.993546	1.44548	7.7929	0.00524519	0.133818
ENSMUSG00000005583	Mef2c	0.802025	1.49622	7.7906	0.00525187	0.133818
ENSMUSG00000090555	Gm8893	-2.15182	8.48631	7.77662	0.00529267	0.13411
ENSMUSG00000068220	Lgals1	1.06221	2.99059	7.7759	0.00529479	0.13411
ENSMUSG00000029125	Stx18	-0.652299	3.55997	7.77589	0.0052948	0.13411
ENSMUSG00000009092	Derl3	-3.2621	2.65554	7.74237	0.005394	0.136353
ENSMUSG00000102525	Gm37784	1.33481	-0.0654342	7.73838	0.00540592	0.136385
ENSMUSG00000105597	4633401B06Rik	1.41138	0.222583	7.72062	0.00545937	0.137462
ENSMUSG00000026873	Phf19	0.988615	1.48309	7.71557	0.00547465	0.137576
ENSMUSG00000032477	Cdc25a	-0.786969	2.04462	7.69414	0.00554004	0.138629
ENSMUSG00000035392	Dennd1a	0.607943	3.77108	7.69233	0.00554561	0.138629
ENSMUSG00000042190	Cmklr1	0.889778	0.649519	7.69121	0.00554904	0.138629
ENSMUSG00000061393	Acvr2b	1.0673	1.97417	7.68471	0.00556906	0.138761
ENSMUSG00000060548	Tnfrsf19	0.959583	2.35135	7.68245	0.00557603	0.138761
ENSMUSG00000055817	Mta3	0.677184	3.01537	7.65827	0.00565127	0.14036
ENSMUSG00000083261	Gm7816	-0.828528	2.97235	7.6502	0.0056766	0.140716
ENSMUSG00000033022	Cdo1	0.660509	10.0184	7.63761	0.00571637	0.141428
ENSMUSG00000041272	Tox	1.00704	2.78835	7.63335	0.00572988	0.141488
ENSMUSG00000097574	C920006O11Rik	0.847064	2.23963	7.62134	0.00576817	0.142159
ENSMUSG00000053094	Tmem248	-0.641816	5.93167	7.61181	0.00579872	0.142399
ENSMUSG00000000320	Alox12	0.956259	-0.184441	7.61136	0.00580017	0.142399
ENSMUSG00000031725	Ces1f	0.921664	8.90186	7.60462	0.00582188	0.142658
ENSMUSG00000020185	E2f7	1.34537	1.22413	7.5909	0.00586636	0.143473
ENSMUSG00000024580	Grpel2	0.667088	5.11068	7.58484	0.00588613	0.143682
ENSMUSG00000060427	Zfp868	-1.18458	3.37591	7.57642	0.00591369	0.143948
ENSMUSG00000021877	Arf4	-0.679557	6.69505	7.57463	0.00591954	0.143948
ENSMUSG00000038042	Ptpdc1	0.9232	0.88161	7.55566	0.0059822	0.145092
ENSMUSG00000075701	Selenos	-0.681576	5.81831	7.55148	0.00599609	0.145092
ENSMUSG00000030263	Lrmp	0.846881	2.01808	7.55012	0.00600062	0.145092
ENSMUSG00000015357	Clpx	-0.535479	5.66981	7.54169	0.00602875	0.145498
ENSMUSG00000032724	Abtb2	-0.84005	3.20274	7.53479	0.00605187	0.14578
ENSMUSG00000022474	Pmm1	0.753644	1.70433	7.52788	0.00607514	0.146066
ENSMUSG00000054920	Klhl5	0.675305	4.29064	7.52077	0.00609918	0.146369
ENSMUSG00000010025	Aldh3a2	0.827357	8.34235	7.51733	0.00611081	0.146373
ENSMUSG00000046782	Ttc6	1.04819	1.01608	7.50496	0.00615293	0.147107
ENSMUSG00000111424	Gm48478	-1.4232	0.34476	7.49735	0.00617898	0.147454
ENSMUSG00000028757	Ddost	-0.626652	6.3916	7.48925	0.00620684	0.147843
ENSMUSG00000031295	Phka2	0.733354	4.42432	7.48031	0.00623772	0.148203
ENSMUSG00000073940	Hbb-bt	-1.1162	5.09865	7.47818	0.00624513	0.148203
ENSMUSG00000070436	Serpinh1	-0.954809	3.64532	7.4593	0.00631096	0.149488
ENSMUSG00000097906	Gm9625	-0.844687	1.71071	7.45403	0.00632945	0.149649
ENSMUSG00000026675	Hsd17b7	0.986402	5.75916	7.40207	0.0065149	0.153749
ENSMUSG00000000326	Comt	-0.693193	9.18998	7.393	0.0065478	0.154037
ENSMUSG00000022150	Dab2	0.579354	3.96443	7.39208	0.00655117	0.154037
ENSMUSG00000070960	Gm19680	0.969654	3.32042	7.38017	0.00659471	0.154776
ENSMUSG00000073155	1810058I24Rik	0.674468	6.63927	7.37654	0.00660801	0.154804
ENSMUSG00000032549	Rab6b	-2.27023	-0.352318	7.3592	0.00667204	0.155941
ENSMUSG00000087695	Gm16291	1.15363	0.63212	7.35681	0.00668092	0.155941
ENSMUSG00000032080	Apoa4	0.915776	7.13459	7.33109	0.00677718	0.157458
ENSMUSG00000028240	Cyp7a1	1.10706	7.64169	7.32998	0.00678139	0.157458
ENSMUSG00000015363	Trabd	-0.595049	6.604	7.32959	0.00678285	0.157458
ENSMUSG00000089675	Ugt1a8	1.66847	0.215821	7.32488	0.00680066	0.157586
ENSMUSG00000041147	Brca2	0.854388	3.01929	7.31571	0.00683543	0.157943
ENSMUSG00000026259	Ngef	1.00607	5.83476	7.3063	0.00687132	0.157943
ENSMUSG00000041642	Kif21b	0.975543	1.37482	7.30293	0.00688424	0.157943
ENSMUSG00000043702	Pde12	-0.706535	3.3492	7.3013	0.00689047	0.157943
ENSMUSG00000004018	Fancl	0.694204	2.8701	7.29963	0.00689688	0.157943
ENSMUSG00000027360	Hdc	1.4064	3.19402	7.29513	0.00691418	0.157943
ENSMUSG00000025869	Nop16	-0.589825	4.69001	7.29508	0.00691436	0.157943
ENSMUSG00000038534	Osbpl7	0.951473	1.06124	7.29495	0.00691486	0.157943
ENSMUSG00000034947	Tmem106a	0.606856	3.62912	7.28087	0.00696927	0.158902
ENSMUSG00000052305	Hbb-bs	-1.07185	7.32182	7.26917	0.00701481	0.159655
ENSMUSG00000051855	Mest	0.955175	0.528357	7.26352	0.00703693	0.159875
ENSMUSG00000104445	Rhbg	-0.913485	1.6061	7.2538	0.00707513	0.160228
ENSMUSG00000026072	Il1r1	-1.3918	5.59598	7.25319	0.00707753	0.160228
ENSMUSG00000028469	Npr2	0.93975	6.23388	7.249	0.00709405	0.160318
ENSMUSG00000024052	Lpin2	0.736886	8.0111	7.23767	0.00713894	0.161048
ENSMUSG00000047109	Cldn14	-1.00092	3.17769	7.22179	0.00720239	0.162193
ENSMUSG00000001416	Cct3	-0.619729	6.45066	7.21661	0.00722318	0.16221
ENSMUSG00000027889	Ampd2	-0.603405	5.02704	7.21333	0.00723641	0.16221
ENSMUSG00000013150	Gfod2	-0.68761	2.53611	7.21215	0.00724117	0.16221
ENSMUSG00000017754	Pltp	1.33891	5.16725	7.19872	0.00729555	0.162884
ENSMUSG00000027993	Trim2	-0.623405	3.41936	7.19843	0.00729674	0.162884
ENSMUSG00000025815	Dhtkd1	0.792906	6.01939	7.19128	0.00732585	0.163249
ENSMUSG00000025089	Gfra1	-0.631512	6.65791	7.17516	0.00739198	0.164436
ENSMUSG00000052133	Sema5b	1.2809	0.256102	7.1619	0.00744683	0.165369
ENSMUSG00000033767	Tmem131l	0.729658	4.64612	7.13502	0.00755929	0.167363
ENSMUSG00000070034	Sp110	0.831263	0.789466	7.13381	0.00756439	0.167363
ENSMUSG00000040093	Bmf	1.54931	3.38068	7.13109	0.00757587	0.167363
ENSMUSG00000030062	Rpn1	-0.733876	7.19643	7.10781	0.00767489	0.169258
ENSMUSG00000029762	Akr1b8	1.06983	2.211	7.10361	0.00769287	0.169362
ENSMUSG00000032718	Mansc1	1.67592	0.537529	7.07635	0.0078108	0.171663
ENSMUSG00000053964	Lgals4	0.973634	4.59033	7.06501	0.00786037	0.172147
ENSMUSG00000041037	Irgq	-0.675772	3.82861	7.06097	0.00787813	0.172147
ENSMUSG00000039607	Rbms3	0.695167	1.90632	7.05925	0.00788571	0.172147
ENSMUSG00000030278	Cidec	-0.702778	1.91744	7.05903	0.00788666	0.172147
ENSMUSG00000042684	Npl	0.846152	0.643021	7.04231	0.00796062	0.172943
ENSMUSG00000033166	Dis3	-0.634853	2.77937	7.04173	0.0079632	0.172943
ENSMUSG00000042622	Maff	1.40133	2.32939	7.03971	0.00797221	0.172943
ENSMUSG00000033933	Vhl	-0.553569	3.63551	7.03858	0.00797722	0.172943
ENSMUSG00000025450	Gm9752	1.04867	2.02456	7.02925	0.00801887	0.173552
ENSMUSG00000022297	Fzd6	1.01314	1.47465	7.02586	0.0080341	0.173588
ENSMUSG00000032265	Tent5a	-0.944301	3.64707	7.01693	0.00807427	0.173793
ENSMUSG00000030577	Cd22	1.1217	0.118795	7.01622	0.00807747	0.173793
ENSMUSG00000028076	Cd1d1	0.667758	8.07584	7.01366	0.00808901	0.173793
ENSMUSG00000038793	Lefty1	1.18483	0.104379	7.01022	0.00810458	0.173793
ENSMUSG00000078597	Cyp4a12b	-0.591778	5.6075	7.00125	0.00814529	0.173793
ENSMUSG00000099032	Tcf24	-1.9316	0.633503	6.9994	0.0081537	0.173793
ENSMUSG00000021831	Ero1l	-0.605182	3.77803	6.99843	0.00815811	0.173793
ENSMUSG00000083396	Gm15542	-0.782395	3.86322	6.99822	0.0081591	0.173793
ENSMUSG00000024270	Slc39a6	-0.902123	1.39516	6.99673	0.00816589	0.173793
ENSMUSG00000026047	Poglut2	-0.614931	2.66199	6.99057	0.00819401	0.174102
ENSMUSG00000099242	Obox4-ps3	0.922856	0.410338	6.97369	0.00827165	0.175461
ENSMUSG00000042787	Exog	-1.09632	1.32901	6.95751	0.00834683	0.176498
ENSMUSG00000027879	Sec22b	-0.705716	5.62117	6.95723	0.00834814	0.176498
ENSMUSG00000049287	Iba57	-0.578687	3.33955	6.95204	0.00837235	0.176717
ENSMUSG00000035451	Foxa1	-1.06343	4.1604	6.92345	0.00850726	0.179269
ENSMUSG00000026502	Desi2	-0.553775	4.02527	6.90223	0.00860884	0.181111
ENSMUSG00000030272	Camk1	0.621895	3.96042	6.8965	0.00863648	0.181395
ENSMUSG00000021629	Slc30a5	-0.757866	5.28727	6.87987	0.00871718	0.182789
ENSMUSG00000056124	B4galt6	0.912947	0.515871	6.86376	0.00879615	0.184143
ENSMUSG00000003032	Klf4	0.902333	0.132369	6.85493	0.00883969	0.184681
ENSMUSG00000040006	Ginm1	-0.552309	5.33473	6.8527	0.00885073	0.184681
ENSMUSG00000027823	Gmps	-0.566084	5.57742	6.83166	0.00895558	0.186565
ENSMUSG00000020444	Guk1	-0.54678	5.06764	6.82536	0.00898726	0.18692
ENSMUSG00000000915	Hip1r	-0.769097	4.81157	6.81529	0.00903807	0.187511
ENSMUSG00000108825	Gm45838	0.672513	2.78206	6.81392	0.00904498	0.187511
ENSMUSG00000031963	Bmper	1.36245	0.522389	6.79318	0.0091507	0.189082
ENSMUSG00000109089	4833411C07Rik	1.04001	2.84789	6.78697	0.00918255	0.189082
ENSMUSG00000030527	Crtc3	-0.732429	3.08165	6.78534	0.00919093	0.189082
ENSMUSG00000033192	Lpcat2	0.843529	0.938848	6.78499	0.00919276	0.189082
ENSMUSG00000036249	Rbm43	0.738632	2.07843	6.78416	0.00919701	0.189082
ENSMUSG00000027199	Gatm	0.640634	2.95258	6.77959	0.00922062	0.189082
ENSMUSG00000024018	Ccdc167	-0.920671	1.39351	6.77889	0.00922423	0.189082
ENSMUSG00000026691	Fmo3	-2.14549	8.06437	6.77486	0.00924507	0.189121
ENSMUSG00000033885	Pxk	-0.636336	4.6011	6.77043	0.00926805	0.189121
ENSMUSG00000069668	Sult3a1	-3.24085	7.24421	6.76996	0.00927048	0.189121
ENSMUSG00000024818	Slc25a45	-0.740052	4.75185	6.75962	0.00932439	0.189918
ENSMUSG00000037447	Arid5a	-1.4588	1.06006	6.74428	0.00940486	0.191252
ENSMUSG00000046080	Clec9a	0.895743	2.04487	6.7305	0.00947782	0.19243
ENSMUSG00000028976	Slc2a5	1.08732	3.62992	6.71462	0.00956256	0.193511
ENSMUSG00000030598	Fbxo17	0.879896	0.059154	6.71239	0.00957454	0.193511
ENSMUSG00000040213	Kyat3	-0.820427	7.5475	6.71133	0.00958021	0.193511
ENSMUSG00000037253	Mex3c	-0.598179	3.66536	6.70846	0.00959567	0.193511
ENSMUSG00000002944	Cd36	1.11946	4.97837	6.70641	0.0096067	0.193511
ENSMUSG00000035472	Slc25a21	0.617615	3.45966	6.68653	0.00971441	0.195089
ENSMUSG00000031661	Nkd1	0.721221	1.98575	6.68632	0.00971554	0.195089
ENSMUSG00000027605	Acss2	1.73033	8.06087	6.67687	0.00976717	0.195811
ENSMUSG00000026614	Slc30a10	-0.772532	4.74713	6.67415	0.00978211	0.195811
ENSMUSG00000026839	Upp2	0.630981	9.39486	6.66908	0.00981	0.196062
ENSMUSG00000020865	Abcc3	1.04647	7.23985	6.64443	0.00994666	0.198483
ENSMUSG00000008604	Ubqln4	-0.481353	5.28614	6.62841	0.0100365	0.199964
ENSMUSG00000029098	Acox3	-0.513076	4.98202	6.62132	0.0100765	0.200449
ENSMUSG00000074102	Rbm15b	-0.54456	3.85153	6.61596	0.0101069	0.200741
ENSMUSG00000047250	Ptgs1	0.572609	3.57892	6.60802	0.0101521	0.201185
ENSMUSG00000029407	Uso1	-0.724402	6.37016	6.6065	0.0101607	0.201185
ENSMUSG00000074925	Ptar1	-0.960474	0.413328	6.60195	0.0101867	0.201318
ENSMUSG00000008153	Clstn3	1.78562	2.17981	6.59982	0.0101989	0.201318
ENSMUSG00000110344	Gm45716	0.762157	2.48844	6.59654	0.0102177	0.201378
ENSMUSG00000020048	Hsp90b1	-1.15613	9.22821	6.58668	0.0102745	0.202024
ENSMUSG00000038648	Creb3l2	-0.782894	4.54114	6.58536	0.0102821	0.202024
ENSMUSG00000031762	Mt2	-3.37275	3.23621	6.57334	0.0103518	0.203082
ENSMUSG00000026659	Dusp12	0.680234	3.40963	6.56484	0.0104013	0.203742
ENSMUSG00000056305	Usp39	-0.535714	4.28853	6.55094	0.0104829	0.205025
ENSMUSG00000067225	Cyp2c54	0.975354	8.02466	6.53916	0.0105525	0.206072
ENSMUSG00000079012	Serpina3m	-1.35637	8.87512	6.52885	0.0106139	0.20653
ENSMUSG00000030357	Fkbp4	-0.647207	7.46436	6.52615	0.01063	0.20653
ENSMUSG00000042659	Arrdc4	0.738546	3.67475	6.52485	0.0106377	0.20653
ENSMUSG00000029502	Golga3	-0.646757	4.8216	6.52291	0.0106494	0.20653
ENSMUSG00000017417	Plxdc1	1.14183	-0.0623682	6.52016	0.0106659	0.20653
ENSMUSG00000022178	Ajuba	-0.949345	2.8075	6.519	0.0106728	0.20653
ENSMUSG00000062593	Gm49339	0.855497	2.98105	6.51222	0.0107136	0.207005
ENSMUSG00000086628	Gm16157	0.563908	3.82525	6.5041	0.0107626	0.207638
ENSMUSG00000060147	Serpinb6a	0.570785	3.81645	6.48921	0.0108531	0.20907
ENSMUSG00000037461	Ints7	-0.529994	4.06519	6.4848	0.0108801	0.209229
ENSMUSG00000031232	Magt1	-0.669154	6.12801	6.48251	0.0108941	0.209229
ENSMUSG00000108064	Gm44423	0.917262	1.50765	6.45206	0.0110824	0.212018
ENSMUSG00000013275	Slc41a1	-0.712993	2.9075	6.44752	0.0111108	0.212018
ENSMUSG00000078650	G6pc	1.01532	7.95333	6.44599	0.0111203	0.212018
ENSMUSG00000022391	Rangap1	-0.743426	5.69131	6.44594	0.0111206	0.212018
ENSMUSG00000040891	Foxa3	-0.733222	5.62838	6.44366	0.0111349	0.212018
ENSMUSG00000028410	Dnaja1	-0.717349	8.15501	6.44305	0.0111388	0.212018
ENSMUSG00000053693	Mast1	0.888035	0.386631	6.43976	0.0111594	0.212095
ENSMUSG00000104501	Gm37736	1.65323	0.931251	6.43563	0.0111854	0.212273
ENSMUSG00000038305	Spats2l	0.860615	0.166983	6.42664	0.0112421	0.213033
ENSMUSG00000034875	Nudt19	0.542548	5.49907	6.42313	0.0112643	0.213139
ENSMUSG00000036957	Lrfn3	-0.846939	1.05648	6.41583	0.0113108	0.213702
ENSMUSG00000024331	Dsc2	0.666539	5.40644	6.39732	0.0114293	0.215623
ENSMUSG00000032437	Stt3b	-0.53062	6.20751	6.3906	0.0114726	0.216034
ENSMUSG00000022003	Slc25a30	-2.19797	3.18667	6.38871	0.0114849	0.216034
ENSMUSG00000086494	2210417A02Rik	1.01509	0.832786	6.38573	0.0115042	0.216079
ENSMUSG00000030551	Nr2f2	0.522533	4.37563	6.38109	0.0115343	0.216327
ENSMUSG00000040760	Appl1	-0.709727	3.28048	6.37101	0.0115999	0.21724
ENSMUSG00000079470	Utp14b	1.13389	3.18948	6.35503	0.0117049	0.218884
ENSMUSG00000001247	Lsr	-0.634196	5.49169	6.33817	0.0118167	0.220653
ENSMUSG00000015843	Rxrg	0.864184	2.32832	6.33469	0.0118399	0.220764
ENSMUSG00000026558	Uck2	-0.676636	3.41323	6.32857	0.0118808	0.221204
ENSMUSG00000090090	Mup-ps16	1.93781	3.99335	6.31668	0.0119607	0.222368
ENSMUSG00000100017	2410022M11Rik	1.07022	0.994748	6.30852	0.0120159	0.223071
ENSMUSG00000021466	Ptch1	-1.17702	4.64213	6.30551	0.0120363	0.223125
ENSMUSG00000058317	Ube2e2	0.537649	3.78726	6.29639	0.0120984	0.223952
ENSMUSG00000009013	Dynll1	-1.02062	4.10009	6.2809	0.0122046	0.225591
ENSMUSG00000048600	Gm5763	-1.29924	1.4217	6.27754	0.0122278	0.225694
ENSMUSG00000061273	Mmgt1	-0.626628	4.57565	6.27059	0.0122759	0.226254
ENSMUSG00000081434	Gm14165	-1.65055	0.916942	6.25069	0.0124145	0.228455
ENSMUSG00000079111	Kdelr2	-0.652487	6.6882	6.24834	0.012431	0.228455
ENSMUSG00000025466	Fuom	0.572273	4.999	6.23895	0.0124971	0.229147
ENSMUSG00000024155	Meiob	0.703021	2.45089	6.237	0.0125108	0.229147
ENSMUSG00000086165	Gm15690	1.61901	1.7592	6.23444	0.0125289	0.229147
ENSMUSG00000052516	Robo2	0.847119	0.663205	6.23283	0.0125403	0.229147
ENSMUSG00000021670	Hmgcr	0.922034	7.111	6.23029	0.0125583	0.229149
ENSMUSG00000099966	2810402E24Rik	0.712208	1.66919	6.22383	0.0126042	0.22961
ENSMUSG00000058756	Thra	0.620391	2.96408	6.22168	0.0126195	0.22961
ENSMUSG00000037541	Shank2	1.07695	2.32088	6.20722	0.012723	0.231165
ENSMUSG00000038991	Txndc5	-0.602911	7.52215	6.20092	0.0127684	0.231387
ENSMUSG00000040990	Sh3kbp1	0.838367	0.802373	6.2003	0.0127729	0.231387
ENSMUSG00000022863	Btg3	-1.26549	1.9952	6.19759	0.0127925	0.231387
ENSMUSG00000068606	Gm4841	1.12322	0.611809	6.19549	0.0128076	0.231387
ENSMUSG00000063550	Nup98	-0.5516	4.39594	6.18785	0.0128631	0.232061
ENSMUSG00000038155	Gstp2	1.11023	4.18868	6.18334	0.0128958	0.232325
ENSMUSG00000022951	Rcan1	-1.2505	4.9666	6.17751	0.0129384	0.232536
ENSMUSG00000028066	Pmf1	0.670102	3.8256	6.17476	0.0129586	0.232536
ENSMUSG00000034837	Gnat1	1.27374	4.77068	6.17091	0.0129868	0.232536
ENSMUSG00000106019	Gm43672	0.979838	1.53665	6.16979	0.012995	0.232536
ENSMUSG00000078552	Dcdc2b	-1.14602	0.542016	6.16932	0.0129984	0.232536
ENSMUSG00000043251	Exoc3l	0.908449	1.5059	6.16565	0.0130255	0.232694
ENSMUSG00000022571	Pycrl	-0.483626	4.95026	6.16022	0.0130655	0.233084
ENSMUSG00000030772	Dkk3	0.805203	0.892417	6.15753	0.0130854	0.233113
ENSMUSG00000069833	Ahnak	-0.687762	4.55853	6.15183	0.0131276	0.233275
ENSMUSG00000110353	Gm33543	0.981918	3.50231	6.14873	0.0131507	0.233275
ENSMUSG00000037720	Tmem33	-0.490746	6.2278	6.14474	0.0131804	0.233275
ENSMUSG00000045410	Akr1e1	-3.12558	4.59489	6.14353	0.0131894	0.233275
ENSMUSG00000032271	Nnmt	-1.09271	7.61388	6.14195	0.0132012	0.233275
ENSMUSG00000021427	Ssr1	-0.644935	6.75782	6.13763	0.0132334	0.233275
ENSMUSG00000024863	Mbl2	0.652175	9.04253	6.13656	0.0132415	0.233275
ENSMUSG00000106951	5930430L01Rik	1.16604	0.533435	6.13316	0.013267	0.233275
ENSMUSG00000021699	Pde4d	1.58825	0.740945	6.13247	0.0132722	0.233275
ENSMUSG00000108624	Gm45091	1.2435	-0.339222	6.13122	0.0132815	0.233275
ENSMUSG00000030245	Golt1b	-0.873854	2.38392	6.12942	0.0132951	0.233275
ENSMUSG00000074807	Gm10762	0.868274	1.22094	6.12496	0.0133286	0.233543
ENSMUSG00000033066	Gas7	0.795561	0.899491	6.11825	0.0133793	0.234111
ENSMUSG00000030787	Lyve1	-0.719621	2.20455	6.11377	0.0134133	0.234154
ENSMUSG00000022204	Ngdn	-0.6749	4.48956	6.11171	0.0134289	0.234154
ENSMUSG00000027806	Tsc22d2	-0.61886	4.3768	6.10497	0.0134802	0.234154
ENSMUSG00000035873	Pawr	-0.733448	2.3821	6.10493	0.0134806	0.234154
ENSMUSG00000053175	Bcl3	-1.03305	4.18122	6.10453	0.0134836	0.234154
ENSMUSG00000087030	Gm16143	0.873307	0.403812	6.10347	0.0134916	0.234154
ENSMUSG00000047867	Gimap6	0.560248	3.46261	6.07836	0.0136848	0.237184
ENSMUSG00000003038	Hmgn2	-0.704998	3.37926	6.07467	0.0137134	0.237359
ENSMUSG00000038893	Fam117a	-0.859298	1.47346	6.07029	0.0137474	0.237611
ENSMUSG00000024905	Tesmin	1.134	0.219517	6.06436	0.0137937	0.237611
ENSMUSG00000028044	Cks1b	-1.01087	2.81584	6.06417	0.0137952	0.237611
ENSMUSG00000020131	Pcsk4	0.733699	4.89458	6.06326	0.0138023	0.237611
ENSMUSG00000032977	Fam207a	-0.528049	4.13089	6.04818	0.0139206	0.239161
ENSMUSG00000081824	Ndufs5-ps	0.696052	4.3807	6.04682	0.0139313	0.239161
ENSMUSG00000022641	Bbx	-0.606689	3.34311	6.04463	0.0139486	0.239161
ENSMUSG00000032578	Cish	-2.16939	4.61418	6.04229	0.0139671	0.239161
ENSMUSG00000027381	Bcl2l11	0.799072	2.76559	6.02588	0.0140976	0.241073
ENSMUSG00000032000	Birc3	0.584498	3.78025	6.01744	0.0141652	0.241905
ENSMUSG00000039145	Camk1d	1.183	5.30246	6.00641	0.014254	0.242906
ENSMUSG00000032246	Calml4	0.842226	0.232316	6.00545	0.0142618	0.242906
ENSMUSG00000064247	Plcxd1	0.816901	0.270009	6.00273	0.0142838	0.242957
ENSMUSG00000019139	Isyna1	-1.36649	3.11778	5.99003	0.0143869	0.24414
ENSMUSG00000050440	Hamp	1.04882	10.5866	5.98947	0.0143915	0.24414
ENSMUSG00000093610	Cyp2c53-ps	-1.12809	0.0675613	5.9823	0.0144501	0.244632
ENSMUSG00000045095	Magi1	0.523819	4.02676	5.98125	0.0144587	0.244632
ENSMUSG00000082588	Gm15443	0.89683	0.225958	5.97809	0.0144847	0.244747
ENSMUSG00000035836	Ugt2b1	-0.651425	9.2119	5.97232	0.0145322	0.245145
ENSMUSG00000028104	Polr3gl	0.585523	2.87835	5.97057	0.0145465	0.245145
ENSMUSG00000045776	Lrtm1	2.36804	3.92974	5.96558	0.0145878	0.245203
ENSMUSG00000078687	Mup8	-1.00127	4.42322	5.96363	0.0146039	0.245203
ENSMUSG00000027506	Tpd52	-0.577021	4.10767	5.9632	0.0146075	0.245203
ENSMUSG00000022498	Txndc11	-0.519089	5.10101	5.94918	0.0147241	0.246836
ENSMUSG00000009145	Dqx1	0.624258	3.79704	5.94401	0.0147674	0.247237
ENSMUSG00000069755	Zfp125	0.835931	1.68514	5.92637	0.0149159	0.249398
ENSMUSG00000015176	Nolc1	-0.463436	5.15816	5.9196	0.0149733	0.249602
ENSMUSG00000021338	Carmil1	0.654444	4.09999	5.9182	0.0149853	0.249602
ENSMUSG00000032883	Acsl3	0.612945	4.71678	5.91803	0.0149867	0.249602
ENSMUSG00000039873	Neurl2	0.943781	0.851067	5.89962	0.0151441	0.251897
ENSMUSG00000076437	Selenoh	0.603745	2.68926	5.89438	0.0151893	0.252319
ENSMUSG00000050989	Selenon	0.729241	1.12744	5.8915	0.0152141	0.252404
ENSMUSG00000017176	Nt5c3b	0.799776	1.20588	5.88476	0.0152725	0.253045
ENSMUSG00000026536	Ifi211	1.24635	-0.0220549	5.87452	0.0153616	0.254192
ENSMUSG00000023147	Wrb	-0.712971	2.02391	5.8699	0.015402	0.25453
ENSMUSG00000044250	Pced1b	1.08304	1.42478	5.86408	0.015453	0.254916
ENSMUSG00000021453	Gadd45g	-3.39049	4.5142	5.8619	0.0154721	0.254916
ENSMUSG00000040466	Blvrb	0.587647	6.83313	5.86042	0.0154851	0.254916
ENSMUSG00000028039	Efna3	1.43257	-0.256369	5.85702	0.0155151	0.255081
ENSMUSG00000019845	Tube1	0.980193	0.0528024	5.8525	0.0155549	0.255408
ENSMUSG00000079457	Gm7609	1.07358	-0.0817542	5.84915	0.0155846	0.255567
ENSMUSG00000067203	H2-K2	0.859682	4.18867	5.83687	0.0156937	0.257027
ENSMUSG00000040339	Fam102b	0.779119	0.765063	5.82664	0.0157852	0.258195
ENSMUSG00000086448	9330162012Rik	0.665292	1.84545	5.80827	0.0159509	0.259541
ENSMUSG00000026890	Lhx6	-0.904412	1.6876	5.80801	0.0159534	0.259541
ENSMUSG00000029304	Spp1	-0.738903	5.23837	5.80647	0.0159673	0.259541
ENSMUSG00000028413	B4galt1	-0.643639	5.9601	5.80607	0.015971	0.259541
ENSMUSG00000066258	Trim12a	0.544522	3.13347	5.80432	0.0159869	0.259541
ENSMUSG00000105509	C130013H08Rik	-0.822614	0.219685	5.80406	0.0159893	0.259541
ENSMUSG00000044042	Fmn1	1.11711	2.32029	5.79898	0.0160354	0.259961
ENSMUSG00000024673	Ms4a1	1.61305	-0.527683	5.79067	0.0161115	0.260439
ENSMUSG00000027478	Dnmt3b	-0.98414	0.821559	5.78997	0.0161179	0.260439
ENSMUSG00000030228	Pik3c2g	1.51603	3.9327	5.78813	0.0161348	0.260439
ENSMUSG00000026222	Sp100	0.559299	3.18116	5.78686	0.0161464	0.260439
ENSMUSG00000031360	Ctps2	0.665466	2.86771	5.78214	0.0161898	0.260811
ENSMUSG00000046962	Zbtb21	-0.731008	2.6073	5.77585	0.0162479	0.261418
ENSMUSG00000008090	Fgfrl1	0.599464	4.85489	5.76718	0.0163282	0.262228
ENSMUSG00000004996	Mri1	0.626818	3.93333	5.76599	0.0163393	0.262228
ENSMUSG00000042444	Mindy2	0.566931	3.96156	5.75572	0.016435	0.263434
ENSMUSG00000021385	Ippk	-0.565188	3.11056	5.75226	0.0164674	0.263451
ENSMUSG00000032369	Plscr1	-0.582182	3.42723	5.74961	0.0164923	0.263451
ENSMUSG00000062209	Erbb4	1.21055	1.93523	5.74808	0.0165067	0.263451
ENSMUSG00000007039	Ddah2	0.758291	1.52269	5.74683	0.0165185	0.263451
ENSMUSG00000027201	Myef2	0.616949	2.35952	5.73771	0.0166044	0.264359
ENSMUSG00000055632	Hmcn2	0.898775	1.54184	5.73641	0.0166167	0.264359
ENSMUSG00000014504	Srp19	-0.568017	4.45553	5.7197	0.0167756	0.266419
ENSMUSG00000031075	Ano1	0.93657	0.688683	5.71675	0.0168038	0.266419
ENSMUSG00000003541	Ier3	0.953076	0.228158	5.71624	0.0168087	0.266419
ENSMUSG00000052291	5330438D12Rik	0.911972	0.361416	5.70478	0.0169187	0.26758
ENSMUSG00000030602	Pak4	-0.560968	2.92814	5.70426	0.0169238	0.26758
ENSMUSG00000072889	Nfxl1	-0.872371	4.10677	5.69974	0.0169674	0.267938
ENSMUSG00000044378	Slc15a5	-1.30715	1.40102	5.69026	0.0170593	0.268822
ENSMUSG00000034723	Tmx4	-0.756135	4.45363	5.68964	0.0170654	0.268822
ENSMUSG00000053477	Tcf4	0.517671	3.42619	5.68542	0.0171065	0.269138
ENSMUSG00000005823	Gpr108	-0.467377	4.85846	5.68032	0.0171563	0.269167
ENSMUSG00000053110	Yap1	-0.455548	5.64024	5.67928	0.0171665	0.269167
ENSMUSG00000021392	Nol8	-0.673096	3.76023	5.67876	0.0171715	0.269167
ENSMUSG00000074052	BC048644	0.994007	3.14185	5.67596	0.0171989	0.269268
ENSMUSG00000025871	4833439L19Rik	-0.498087	6.11547	5.67148	0.0172429	0.269625
ENSMUSG00000110996	Gm36251	0.73779	1.32449	5.6612	0.0173442	0.270693
ENSMUSG00000044645	Gm7334	-1.17061	-0.123283	5.66027	0.0173535	0.270693
ENSMUSG00000082644	Mup-ps19	-0.892159	9.87412	5.65466	0.017409	0.271229
ENSMUSG00000036158	Prickle1	0.697856	1.72964	5.65091	0.0174463	0.271479
ENSMUSG00000030029	Lrig1	-0.584296	4.43203	5.64473	0.0175079	0.272106
ENSMUSG00000047180	Neurl3	0.598805	2.59019	5.63499	0.0176055	0.27263
ENSMUSG00000023030	Slc11a2	-0.49725	4.59618	5.62616	0.0176944	0.27263
ENSMUSG00000020946	Gosr2	-0.597535	5.85126	5.61899	0.0177669	0.27263
ENSMUSG00000030471	Zdhhc13	-0.778147	2.52592	5.61878	0.017769	0.27263
ENSMUSG00000075552	Cyp3a41b	-2.3129	9.12302	5.61783	0.0177786	0.27263
ENSMUSG00000022041	Chrna2	-0.769664	1.65441	5.6177	0.0177799	0.27263
ENSMUSG00000020889	Nr1d1	0.894317	4.79119	5.61757	0.0177813	0.27263
ENSMUSG00000087222	E030042O20Rik	0.962286	-0.230007	5.61728	0.0177843	0.27263
ENSMUSG00000031842	Pde4c	-0.641528	4.67892	5.61705	0.0177865	0.27263
ENSMUSG00000002052	Supt6	-0.456804	5.26315	5.61677	0.0177894	0.27263
ENSMUSG00000034687	Fras1	0.809751	3.09008	5.61498	0.0178076	0.27263
ENSMUSG00000060935	Tmem263	-0.900389	2.97957	5.6128	0.0178298	0.27263
ENSMUSG00000085287	4833418N02Rik	0.680113	1.77072	5.61201	0.0178378	0.27263
ENSMUSG00000005802	Slc30a4	-0.599014	3.62159	5.61115	0.0178466	0.27263
ENSMUSG00000056025	Clca3a1	0.689535	2.5977	5.6097	0.0178613	0.27263
ENSMUSG00000018378	Cuedc1	0.819147	1.35562	5.60705	0.0178884	0.272718
ENSMUSG00000037266	Rsrp1	0.904733	8.78016	5.60476	0.0179118	0.272749
ENSMUSG00000054417	Cyp3a44	-1.06582	7.04424	5.60107	0.0179495	0.272999
ENSMUSG00000021928	Ebpl	0.491181	6.4349	5.59839	0.017977	0.273092
ENSMUSG00000001911	Nfix	0.719122	5.06869	5.5905	0.0180582	0.273666
ENSMUSG00000085929	Gm13421	-0.888479	0.516118	5.58895	0.0180741	0.273666
ENSMUSG00000017639	Rab11fip4	-0.98353	1.3654	5.58848	0.0180789	0.273666
ENSMUSG00000004098	Col5a3	0.697725	4.70401	5.57143	0.0182559	0.275945
ENSMUSG00000045827	Serpinb9	0.90922	2.73002	5.56864	0.018285	0.275945
ENSMUSG00000026656	Fcgr2b	0.619194	5.81971	5.56776	0.0182942	0.275945
ENSMUSG00000085995	Gm2788	-0.943406	4.64293	5.56527	0.0183202	0.276011
ENSMUSG00000035158	Mitf	-0.795768	1.79823	5.55851	0.018391	0.2766
ENSMUSG00000097316	Gm10516	-0.868399	0.246851	5.55742	0.0184025	0.2766
ENSMUSG00000032125	Robo4	0.643267	3.30177	5.55457	0.0184325	0.276725
ENSMUSG00000032604	Qars	-0.473862	5.61733	5.55073	0.018473	0.277008
ENSMUSG00000027399	Il1a	0.678428	1.66687	5.54269	0.018558	0.277836
ENSMUSG00000035273	Hpse	0.589226	2.34365	5.54141	0.0185716	0.277836
ENSMUSG00000046441	Cmtr2	-0.756045	1.69102	5.5364	0.0186248	0.278125
ENSMUSG00000057054	Inca1	0.524526	3.77365	5.5355	0.0186344	0.278125
ENSMUSG00000027965	Olfm3	1.12892	1.79034	5.52955	0.0186979	0.278747
ENSMUSG00000017929	B4galt5	-0.563062	5.20162	5.52446	0.0187524	0.279235
ENSMUSG00000024777	Ppp2r5b	-0.573902	3.19327	5.51905	0.0188105	0.279762
ENSMUSG00000047496	Rnf152	0.535774	4.2321	5.51709	0.0188316	0.279762
ENSMUSG00000041632	Mrps27	-0.585316	4.20565	5.50875	0.0189216	0.280044
ENSMUSG00000067144	Slc22a7	-0.713138	6.24636	5.50842	0.0189251	0.280044
ENSMUSG00000032078	Zpr1	0.932305	6.46279	5.50808	0.0189288	0.280044
ENSMUSG00000005677	Nr1i3	0.921965	6.82313	5.50681	0.0189426	0.280044
ENSMUSG00000020105	Lrig3	0.536485	3.03099	5.50367	0.0189766	0.280044
ENSMUSG00000015461	Atf6b	-0.552748	3.93661	5.50318	0.018982	0.280044
ENSMUSG00000031833	Mast3	0.600871	5.6452	5.49862	0.0190315	0.280351
ENSMUSG00000020156	Pwwp3a	0.581679	3.7037	5.49567	0.0190637	0.280351
ENSMUSG00000053411	Cbx7	0.793484	3.52201	5.49522	0.0190685	0.280351
ENSMUSG00000028838	Extl1	0.773767	3.84366	5.48481	0.0191824	0.281638
ENSMUSG00000052713	Zfp608	0.818424	0.768881	5.4832	0.0192001	0.281638
ENSMUSG00000025269	Apex2	-0.520143	3.06608	5.48093	0.019225	0.281681
ENSMUSG00000027217	Tspan18	0.945185	0.175972	5.47342	0.0193079	0.282175
ENSMUSG00000021871	Gm49342	-0.665633	5.74128	5.47251	0.0193178	0.282175
ENSMUSG00000026974	Zmynd19	-0.525762	3.31816	5.47187	0.0193249	0.282175
ENSMUSG00000032679	Cd59a	0.477717	5.92637	5.46433	0.0194085	0.283072
ENSMUSG00000058806	Col13a1	0.771966	2.03013	5.45864	0.0194718	0.283671
ENSMUSG00000037095	Lrg1	-1.1553	7.80713	5.45525	0.0195097	0.283852
ENSMUSG00000021236	Entpd5	0.75669	7.72231	5.45299	0.0195349	0.283852
ENSMUSG00000085882	2610507I01Rik	-0.571371	2.60155	5.45085	0.0195588	0.283852
ENSMUSG00000086629	2810403D21Rik	0.792674	0.46834	5.44959	0.019573	0.283852
ENSMUSG00000041229	Phf8	-0.606003	3.65198	5.44228	0.0196549	0.284345
ENSMUSG00000030298	Sec13	-0.733368	6.00689	5.44148	0.019664	0.284345
ENSMUSG00000061479	Snrpa	-0.590147	4.35942	5.44063	0.0196736	0.284345
ENSMUSG00000005611	Mrvi1	0.775972	0.126961	5.43382	0.0197504	0.285133
ENSMUSG00000048445	Ccdc57	0.797698	2.45772	5.42075	0.0198988	0.286585
ENSMUSG00000044757	Gm6430	-0.672987	0.973839	5.42017	0.0199054	0.286585
ENSMUSG00000015839	Nfe2l2	0.548066	6.11003	5.41785	0.0199319	0.286585
ENSMUSG00000028643	Svbp	0.555652	2.5561	5.41708	0.0199407	0.286585
ENSMUSG00000108425	Gm44706	1.01775	1.91816	5.41355	0.0199811	0.286844
ENSMUSG00000025224	Gbf1	-0.523366	5.31705	5.40641	0.020063	0.287124
ENSMUSG00000086610	Gm15408	0.888538	2.23942	5.40447	0.0200852	0.287124
ENSMUSG00000035614	Togaram1	-0.629917	3.43128	5.40343	0.0200972	0.287124
ENSMUSG00000026887	Mrrf	-0.502944	4.56803	5.40263	0.0201065	0.287124
ENSMUSG00000028277	Ube2j1	-0.502863	5.27454	5.40207	0.0201128	0.287124
ENSMUSG00000029417	Cxcl9	0.554149	3.63937	5.39779	0.0201623	0.28751
ENSMUSG00000057561	Eif1a	-0.632873	5.65512	5.39161	0.0202338	0.287978
ENSMUSG00000004473	Clec11a	0.747352	0.64378	5.39106	0.0202402	0.287978
ENSMUSG00000024986	Hhex	-0.98625	6.02087	5.38514	0.020309	0.288636
ENSMUSG00000024799	Tm7sf2	0.588695	7.26839	5.3599	0.020605	0.292517
ENSMUSG00000073557	Ppp1r12b	0.562143	2.80269	5.3561	0.0206499	0.292803
ENSMUSG00000042348	Arl15	-0.605386	3.07904	5.35259	0.0206915	0.292803
ENSMUSG00000057406	Nsd2	-0.468944	4.08454	5.35087	0.0207119	0.292803
ENSMUSG00000073599	Ecscr	0.667964	1.29586	5.35047	0.0207167	0.292803
ENSMUSG00000023079	Gtf2ird1	-0.620072	2.91856	5.34748	0.0207522	0.292982
ENSMUSG00000038170	Pde4dip	-0.487703	6.34501	5.34404	0.0207932	0.293237
ENSMUSG00000069456	Rdh16	0.903598	6.56104	5.3421	0.0208164	0.29324
ENSMUSG00000020453	Patz1	0.702524	1.65184	5.32524	0.0210187	0.295765
ENSMUSG00000024254	Abcg8	0.891437	6.30322	5.31975	0.021085	0.296372
ENSMUSG00000065954	Tacc1	-0.591281	5.28885	5.31063	0.0211957	0.297601
ENSMUSG00000024211	Grm8	0.865694	0.513918	5.30166	0.0213051	0.298692
ENSMUSG00000027858	Tspan2	0.874323	0.236858	5.29654	0.0213678	0.298692
ENSMUSG00000040505	Abcg5	0.887633	6.68467	5.29606	0.0213737	0.298692
ENSMUSG00000038482	Tfdp1	-0.556178	4.30748	5.29572	0.0213779	0.298692
ENSMUSG00000110424	1700012D14Rik	0.790627	0.0721516	5.29432	0.0213951	0.298692
ENSMUSG00000100005	B130024G19Rik	0.9347	0.594773	5.29267	0.0214154	0.298692
ENSMUSG00000036073	Galt	0.498774	5.03437	5.28953	0.021454	0.298692
ENSMUSG00000003279	Dlgap1	0.844459	1.44869	5.28902	0.0214603	0.298692
ENSMUSG00000037902	Sirpa	0.546451	3.92424	5.28505	0.0215093	0.29903
ENSMUSG00000050270	Tmem220	0.548935	3.88432	5.28327	0.0215313	0.29903
ENSMUSG00000060904	Arl1	-0.484836	6.63657	5.27961	0.0215766	0.299335
ENSMUSG00000027997	Casp6	0.702667	4.08635	5.27062	0.0216882	0.300557
ENSMUSG00000022500	Litaf	-0.77013	5.70133	5.26468	0.0217624	0.301258
ENSMUSG00000039137	Whrn	0.909498	0.0644148	5.2567	0.0218625	0.302103
ENSMUSG00000036764	Dnajc12	-1.39938	3.44285	5.25417	0.0218942	0.302103
ENSMUSG00000040978	Gm11992	1.3239	-0.131433	5.25417	0.0218942	0.302103
ENSMUSG00000010307	Tmem86a	0.640771	2.87652	5.25038	0.021942	0.302171
ENSMUSG00000039304	Tnfsf10	0.800538	2.39859	5.24828	0.0219685	0.302171
ENSMUSG00000111709	Gm3776	1.63649	0.177877	5.24816	0.02197	0.302171
ENSMUSG00000073491	Ifi213	1.02497	0.885203	5.24216	0.0220459	0.302607
ENSMUSG00000059142	Zfp945	0.54796	3.74124	5.24191	0.0220491	0.302607
ENSMUSG00000097101	1810034E14Rik	0.603754	2.71211	5.23447	0.0221435	0.303554
ENSMUSG00000070810	Sult2a6	-4.30318	3.75084	5.23274	0.0221656	0.303554
ENSMUSG00000026435	Slc45a3	-0.879965	4.32995	5.22713	0.0222372	0.30421
ENSMUSG00000105957	Gm43254	0.901971	-0.26301	5.22011	0.0223272	0.304578
ENSMUSG00000006014	Prg4	-0.930834	5.30868	5.21997	0.022329	0.304578
ENSMUSG00000024501	Dpysl3	0.76916	0.765898	5.21945	0.0223356	0.304578
ENSMUSG00000110317	Gm45250	0.796916	1.89476	5.2152	0.0223902	0.304906
ENSMUSG00000040661	Rad54l2	0.483202	5.02222	5.21173	0.022435	0.304906
ENSMUSG00000062300	Nectin2	-0.662606	5.04608	5.21119	0.022442	0.304906
ENSMUSG00000030595	Nfkbib	-0.56412	3.7334	5.20911	0.0224688	0.304906
ENSMUSG00000035325	Sec31a	-0.494191	6.80648	5.20834	0.0224788	0.304906
ENSMUSG00000085741	5430405H02Rik	0.80236	0.33471	5.20006	0.0225861	0.305478
ENSMUSG00000024030	Abcg1	0.600389	2.25935	5.19911	0.0225984	0.305478
ENSMUSG00000031147	Magix	0.629883	3.3499	5.19891	0.0226011	0.305478
ENSMUSG00000022139	Mbnl2	-0.507704	5.24978	5.19772	0.0226165	0.305478
ENSMUSG00000032349	Elovl5	1.00642	8.25975	5.19119	0.0227016	0.306304
ENSMUSG00000018999	Slc35b4	-0.513196	4.40984	5.1739	0.0229287	0.307817
ENSMUSG00000106069	Gm6135	0.782833	4.03569	5.17359	0.0229328	0.307817
ENSMUSG00000002980	Bcam	0.73934	1.93028	5.17278	0.0229434	0.307817
ENSMUSG00000053898	Ech1	0.543677	8.35619	5.1702	0.0229775	0.307817
ENSMUSG00000030064	Frmd4b	0.850653	5.75445	5.16944	0.0229876	0.307817
ENSMUSG00000008575	Nfib	0.503645	6.5205	5.16709	0.0230187	0.307817
ENSMUSG00000027804	Ppid	-0.476755	5.40222	5.16616	0.0230311	0.307817
ENSMUSG00000031613	Hpgd	0.562833	6.63409	5.1659	0.0230345	0.307817
ENSMUSG00000039089	L3mbtl3	-0.603068	2.56425	5.16308	0.0230719	0.307817
ENSMUSG00000031171	Ftsj1	-0.498023	4.20402	5.16027	0.0231093	0.307817
ENSMUSG00000023826	Prkn	0.696212	1.83423	5.16007	0.0231119	0.307817
ENSMUSG00000032116	Stt3a	-0.608906	6.56838	5.15716	0.0231508	0.307817
ENSMUSG00000039298	Cdk5rap2	0.636123	2.17323	5.1567	0.0231569	0.307817
ENSMUSG00000024352	Spata24	0.743029	0.806945	5.15429	0.0231889	0.307817
ENSMUSG00000024816	Frmd8	-0.918948	4.21269	5.15375	0.0231962	0.307817
ENSMUSG00000030246	Ldhb	0.720288	2.02322	5.15071	0.0232369	0.307817
ENSMUSG00000000811	Txnrd3	0.548386	3.18522	5.14847	0.0232669	0.307817
ENSMUSG00000105987	AI506816	-1.08372	-0.224767	5.14831	0.0232691	0.307817
ENSMUSG00000021188	Trip11	-0.562938	5.0071	5.14816	0.023271	0.307817
ENSMUSG00000047037	Nipa1	0.92947	0.139201	5.14165	0.0233584	0.308654
ENSMUSG00000022519	Srl	1.57517	-0.546126	5.13094	0.0235029	0.310244
ENSMUSG00000032018	Sc5d	0.973207	8.91484	5.12605	0.0235693	0.310799
ENSMUSG00000026999	Nup35	-0.613058	2.61348	5.1038	0.0238736	0.314487
ENSMUSG00000027167	Elp4	0.634524	2.3139	5.10052	0.0239186	0.314647
ENSMUSG00000035498	Cdcp1	2.07722	1.02467	5.09798	0.0239537	0.314647
ENSMUSG00000085468	Gm15343	0.657087	1.62429	5.09756	0.0239595	0.314647
ENSMUSG00000056602	Fry	0.901729	0.288512	5.09461	0.0240004	0.31486
ENSMUSG00000022032	Scara5	-1.603	4.07785	5.08762	0.0240972	0.315484
ENSMUSG00000056973	Ces1d	0.800279	10.1837	5.08585	0.0241218	0.315484
ENSMUSG00000031355	Arhgap6	0.939245	1.71671	5.08496	0.0241343	0.315484
ENSMUSG00000023963	Cyp39a1	-0.624491	4.63692	5.08407	0.0241466	0.315484
ENSMUSG00000033365	Ipo13	-0.502557	3.89759	5.0726	0.0243069	0.317255
ENSMUSG00000030423	Pop4	0.57491	3.54625	5.06958	0.0243494	0.317485
ENSMUSG00000057596	Trim30d	0.643604	2.59596	5.06439	0.0244223	0.317656
ENSMUSG00000005107	Slc2a9	0.689985	5.51148	5.0637	0.024432	0.317656
ENSMUSG00000038418	Egr1	1.89667	3.94752	5.06252	0.0244486	0.317656
ENSMUSG00000022221	Ripk3	0.813033	0.596902	5.05921	0.0244955	0.317656
ENSMUSG00000040584	Abcb1a	0.862472	2.8789	5.05883	0.0245008	0.317656
ENSMUSG00000030739	Myh14	0.573016	3.49089	5.05642	0.0245348	0.317656
ENSMUSG00000002343	Armc6	-0.596506	2.34489	5.05632	0.0245363	0.317656
ENSMUSG00000024487	Yipf5	-0.624202	5.20057	5.05167	0.0246022	0.318187
ENSMUSG00000075514	Gm13375	1.09461	0.895186	5.04895	0.0246408	0.318258
ENSMUSG00000016024	Lbp	-0.824263	5.9417	5.04619	0.0246802	0.318258
ENSMUSG00000067787	Blcap	-0.447652	4.39276	5.04557	0.024689	0.318258
ENSMUSG00000023087	Noct	1.071	6.32768	5.04429	0.0247072	0.318258
ENSMUSG00000022469	Rapgef3	0.647642	1.58364	5.03854	0.0247894	0.318296
ENSMUSG00000037344	Slc12a9	0.808389	4.50873	5.03844	0.0247908	0.318296
ENSMUSG00000014867	Surf4	-0.513273	7.73591	5.03808	0.0247959	0.318296
ENSMUSG00000055067	Smyd3	0.692965	1.64384	5.03626	0.0248221	0.318296
ENSMUSG00000044562	Rasip1	0.697448	1.74859	5.03489	0.0248417	0.318296
ENSMUSG00000024231	Cul2	-0.479587	4.98394	5.03365	0.0248595	0.318296
ENSMUSG00000028282	Casp8ap2	-0.639917	2.53916	5.03011	0.0249103	0.318628
ENSMUSG00000097203	4732419C18Rik	0.564113	2.5219	5.01908	0.0250694	0.320235
ENSMUSG00000026773	Pfkfb3	-0.93907	4.29017	5.01794	0.0250861	0.320235
ENSMUSG00000020776	Fbf1	0.603923	3.38499	5.00607	0.0252585	0.321711
ENSMUSG00000049717	Lig4	-0.627185	2.26184	5.00519	0.0252715	0.321711
ENSMUSG00000069917	Hba-a2	-1.80788	4.79046	5.0048	0.0252771	0.321711
ENSMUSG00000024778	Fas	-0.6043	4.07224	4.997	0.0253913	0.322415
ENSMUSG00000048949	Gm6206	-0.707426	2.12971	4.99645	0.0253994	0.322415
ENSMUSG00000049300	Prmt6	-0.587862	2.2993	4.99586	0.0254081	0.322415
ENSMUSG00000028337	Coro2a	-1.3895	0.302198	4.99001	0.0254941	0.323007
ENSMUSG00000020495	Smg8	-0.519392	2.96703	4.98925	0.0255052	0.323007
ENSMUSG00000087380	2210408F21Rik	0.507601	3.37141	4.98623	0.0255498	0.323252
ENSMUSG00000030762	Aqp8	1.77556	6.79276	4.98023	0.0256385	0.323763
ENSMUSG00000021003	Galc	0.621385	2.15656	4.97954	0.0256488	0.323763
ENSMUSG00000060771	Tsga10	-0.685723	0.764544	4.97837	0.0256661	0.323763
ENSMUSG00000035509	Fbxl21	0.594705	2.59695	4.97597	0.0257018	0.323894
ENSMUSG00000023885	Thbs2	0.702951	0.583008	4.96917	0.025803	0.324334
ENSMUSG00000039670	Oxld1	0.606424	3.32687	4.96893	0.0258066	0.324334
ENSMUSG00000106526	Gm42604	1.06732	1.46092	4.96695	0.0258361	0.324334
ENSMUSG00000040183	Ankrd6	1.46089	0.30096	4.96681	0.0258382	0.324334
ENSMUSG00000107997	Gm44243	1.08251	0.711083	4.95863	0.0259607	0.32524
ENSMUSG00000037370	Enpp1	0.708712	4.91905	4.9586	0.0259612	0.32524
ENSMUSG00000006494	Pdk1	0.787938	6.95863	4.95505	0.0260145	0.325377
ENSMUSG00000040829	Zmynd15	0.678508	2.11746	4.95449	0.026023	0.325377
ENSMUSG00000004270	Lpcat3	0.600424	6.37619	4.94978	0.026094	0.325946
ENSMUSG00000074115	Saa1	-2.73802	8.32189	4.94664	0.0261414	0.326219
ENSMUSG00000035914	Cd276	-0.835542	1.39948	4.94359	0.0261876	0.326477
ENSMUSG00000025477	Inpp5a	0.521851	3.73023	4.94184	0.0262141	0.326489
ENSMUSG00000020423	Btg2	-0.73117	3.21344	4.93542	0.0263117	0.327386
ENSMUSG00000057897	Camk2b	1.42773	3.11194	4.93247	0.0263566	0.327626
ENSMUSG00000022235	Cmbl	0.498495	7.21916	4.92979	0.0263975	0.327816
ENSMUSG00000023150	Ivns1abp	-0.562272	7.05187	4.92118	0.0265294	0.329053
ENSMUSG00000025586	Cpeb1	0.63028	2.90923	4.91893	0.0265639	0.329053
ENSMUSG00000026617	Bpnt1	-0.49738	5.65256	4.91826	0.0265743	0.329053
ENSMUSG00000073555	Gm4951	-0.529493	6.08045	4.90752	0.0267401	0.330607
ENSMUSG00000032264	Zw10	-0.444456	4.01687	4.90655	0.026755	0.330607
ENSMUSG00000079505	Gm11131	0.704003	0.86729	4.90511	0.0267774	0.330607
ENSMUSG00000021223	Papln	0.880089	0.378584	4.90191	0.0268271	0.330902
ENSMUSG00000027405	Nop56	-0.489698	4.79619	4.8983	0.0268831	0.331273
ENSMUSG00000004567	Mcoln1	0.445129	5.32818	4.89609	0.0269175	0.331378
ENSMUSG00000043993	2900052L18Rik	0.864596	1.49862	4.89084	0.0269995	0.332068
ENSMUSG00000057465	Saa2	-3.02279	7.24345	4.88622	0.0270719	0.332446
ENSMUSG00000038415	Foxq1	-1.90486	4.0648	4.8849	0.0270926	0.332446
ENSMUSG00000049115	Agtr1a	0.464805	5.19779	4.88391	0.0271082	0.332446
ENSMUSG00000045658	Pid1	-0.463544	6.0125	4.8802	0.0271664	0.332841
ENSMUSG00000025498	Irf7	0.572503	5.19411	4.87729	0.0272123	0.333055
ENSMUSG00000021611	Tert	0.601959	3.17211	4.87579	0.027236	0.333055
ENSMUSG00000027079	Clp1	-0.525185	4.01028	4.87085	0.027314	0.333645
ENSMUSG00000039166	Akap7	0.654988	2.56307	4.86944	0.0273364	0.333645
ENSMUSG00000097164	Cep83os	0.738335	1.11817	4.86486	0.027409	0.333665
ENSMUSG00000026131	Dst	-0.532607	6.0392	4.8645	0.0274147	0.333665
ENSMUSG00000062203	Gspt1	-0.484829	5.98153	4.8644	0.0274163	0.333665
ENSMUSG00000037225	Fgf2	0.673236	1.77856	4.86026	0.0274821	0.334148
ENSMUSG00000031668	Eif2ak3	-0.68892	3.64201	4.848	0.0276782	0.336212
ENSMUSG00000101514	Gm5524	0.747803	3.01103	4.84446	0.0277351	0.336585
ENSMUSG00000035898	Uba6	-0.64335	2.75332	4.83351	0.0279117	0.338406
ENSMUSG00000026499	Acbd3	-0.529896	4.01983	4.83097	0.0279529	0.338515
ENSMUSG00000004846	Plod3	-0.508601	4.54735	4.82838	0.0279949	0.338515
ENSMUSG00000020883	Fbxl20	0.583379	5.02417	4.82806	0.0280001	0.338515
ENSMUSG00000041096	Tspyl2	-1.48585	3.3857	4.82474	0.0280541	0.338848
ENSMUSG00000041012	Cmtm8	0.519957	5.54924	4.81813	0.0281619	0.339829
ENSMUSG00000021843	Ktn1	0.516538	4.20164	4.81645	0.0281894	0.33984
ENSMUSG00000030340	Scnn1a	0.570642	5.28056	4.81457	0.02822	0.339889
ENSMUSG00000026098	Pms1	0.630045	2.11644	4.8126	0.0282524	0.339959
ENSMUSG00000031903	Pla2g15	0.575808	4.197	4.80993	0.0282962	0.340166
ENSMUSG00000067656	Slc22a27	1.85605	3.82633	4.80565	0.0283666	0.340693
ENSMUSG00000042349	Ikbke	-0.91236	4.42942	4.80058	0.0284502	0.341376
ENSMUSG00000040370	Etfrf1	0.496097	5.69007	4.79748	0.0285014	0.34167
ENSMUSG00000047638	Nr1h4	0.50846	7.43603	4.795	0.0285425	0.341842
ENSMUSG00000059714	Flot1	0.538281	4.11284	4.7909	0.0286105	0.342335
ENSMUSG00000059482	2610301B20Rik	-0.560863	2.5342	4.78448	0.0287174	0.343293
ENSMUSG00000022994	Adcy6	0.484848	4.55501	4.78027	0.0287875	0.343811
ENSMUSG00000026946	Nmi	0.510139	4.05609	4.77527	0.0288713	0.344489
ENSMUSG00000086341	Gm15932	0.823482	0.273967	4.77137	0.0289368	0.344949
ENSMUSG00000030284	Creld1	-0.448252	5.22397	4.76741	0.0290034	0.345421
ENSMUSG00000044122	Proca1	0.630207	1.24588	4.76561	0.0290337	0.345461
ENSMUSG00000027822	Slc33a1	-0.517958	5.94058	4.76023	0.0291246	0.34622
ENSMUSG00000020650	Bcap29	0.581666	3.03107	4.7574	0.0291726	0.346468
ENSMUSG00000056737	Capg	0.716276	0.660068	4.75508	0.0292119	0.346613
ENSMUSG00000063388	BC023105	1.0194	1.89327	4.75294	0.0292483	0.346723
ENSMUSG00000026822	Lcn2	-2.53384	4.25685	4.75135	0.0292753	0.346723
ENSMUSG00000040738	Ints8	-0.473125	4.11794	4.74685	0.029352	0.347303
ENSMUSG00000030214	Plbd1	0.48429	5.47433	4.74494	0.0293845	0.347303
ENSMUSG00000078607	1810010H24Rik	0.647766	1.25361	4.74335	0.0294117	0.347303
ENSMUSG00000041231	Ublcp1	-0.421761	4.80197	4.74133	0.0294464	0.347303
ENSMUSG00000022091	Sorbs3	0.649696	4.79953	4.74053	0.02946	0.347303
ENSMUSG00000107552	Gm44096	0.737497	0.878181	4.73445	0.0295642	0.347627
ENSMUSG00000029597	Sds	0.675884	7.28536	4.73418	0.0295689	0.347627
ENSMUSG00000038576	Susd4	0.703614	4.49511	4.73417	0.0295691	0.347627
ENSMUSG00000057236	Rbbp4	-0.461285	6.4061	4.72978	0.0296446	0.347974
ENSMUSG00000038526	Car14	-0.871593	4.68402	4.7293	0.029653	0.347974
ENSMUSG00000029161	Cgref1	-1.12625	0.381597	4.72486	0.0297297	0.348554
ENSMUSG00000031010	Usp9x	-0.783953	5.84637	4.72223	0.0297751	0.348555
ENSMUSG00000029616	Erp29	-0.539423	5.43662	4.7217	0.0297843	0.348555
ENSMUSG00000046897	Zfp740	0.473354	4.80326	4.71062	0.0299768	0.349914
ENSMUSG00000085376	Gm14508	0.773177	0.232634	4.70981	0.029991	0.349914
ENSMUSG00000026020	Nop58	-0.503707	4.50209	4.70948	0.0299967	0.349914
ENSMUSG00000047248	C2cd3	-0.500666	3.06548	4.70646	0.0300494	0.349914
ENSMUSG00000040359	Ufl1	-0.568457	4.95606	4.70588	0.0300595	0.349914
ENSMUSG00000028556	Dock7	0.525501	3.94782	4.70553	0.0300657	0.349914
ENSMUSG00000075389	2810410L24Rik	0.748237	2.03827	4.70403	0.0300919	0.349914
ENSMUSG00000036580	Spg20	-0.459371	4.60296	4.70172	0.0301325	0.350067
ENSMUSG00000022236	Ropn1l	0.483202	3.65184	4.69883	0.0301831	0.350338
ENSMUSG00000037440	Vnn1	0.849834	4.92257	4.6939	0.0302698	0.351026
ENSMUSG00000034088	Hdlbp	-0.550948	8.61607	4.69124	0.0303167	0.351204
ENSMUSG00000028330	Ncbp1	-0.481736	4.72361	4.68992	0.0303401	0.351204
ENSMUSG00000056228	Cars2	-0.51778	3.52419	4.6882	0.0303705	0.351238
ENSMUSG00000079343	C1s2	0.674572	5.08828	4.68252	0.0304711	0.352083
ENSMUSG00000033502	Cdc14a	0.770273	0.203768	4.66786	0.0307321	0.354779
ENSMUSG00000030149	Klrk1	0.795552	0.741922	4.66439	0.0307944	0.355102
ENSMUSG00000057788	Ddx49	-0.449019	3.81664	4.66079	0.030859	0.355102
ENSMUSG00000097787	2700046G09Rik	0.942869	0.0526594	4.6598	0.0308767	0.355102
ENSMUSG00000001229	Dpp9	-0.480615	4.85574	4.65753	0.0309176	0.355102
ENSMUSG00000044937	Ttc41	-0.976254	2.17469	4.65646	0.0309369	0.355102
ENSMUSG00000092545	Gm20319	0.463451	5.12428	4.65632	0.0309395	0.355102
ENSMUSG00000026425	Srgap2	0.539416	4.27834	4.65309	0.0309976	0.355102
ENSMUSG00000090386	Mir99ahg	0.622975	0.750262	4.6501	0.0310517	0.355102
ENSMUSG00000054021	Sirt5	0.501347	3.49061	4.6482	0.0310862	0.355102
ENSMUSG00000051934	Spats2	0.665357	1.94732	4.64723	0.0311037	0.355102
ENSMUSG00000036854	Hspb6	0.666257	3.20978	4.64717	0.0311048	0.355102
ENSMUSG00000037709	Fam13a	0.616557	4.0028	4.64658	0.0311155	0.355102
ENSMUSG00000052957	Gas1	0.701169	3.58965	4.64283	0.0311835	0.355102
ENSMUSG00000025408	Ddit3	-1.04198	3.51214	4.6424	0.0311913	0.355102
ENSMUSG00000023988	Bysl	-0.601301	3.66259	4.64236	0.031192	0.355102
ENSMUSG00000052085	Dock8	0.713249	4.56673	4.64029	0.0312297	0.355102
ENSMUSG00000047368	Abhd17b	-1.35755	4.47131	4.63924	0.0312488	0.355102
ENSMUSG00000087213	2810408I11Rik	-1.3428	0.875721	4.6373	0.0312841	0.355102
ENSMUSG00000106978	N4bp2os	0.961918	0.817721	4.63689	0.0312917	0.355102
ENSMUSG00000086938	4930481A15Rik	-3.0781	1.39684	4.63559	0.0313154	0.355102
ENSMUSG00000078786	BC024978	-0.56858	3.76289	4.63318	0.0313594	0.355286
ENSMUSG00000040430	Pitpnc1	0.490747	4.93735	4.62855	0.0314442	0.355931
ENSMUSG00000031568	Rwdd4a	-0.429761	4.39857	4.62556	0.0314991	0.356237
ENSMUSG00000055319	Sec23ip	-0.503057	4.47004	4.62323	0.0315418	0.35626
ENSMUSG00000056608	Chd9	-0.668364	5.62484	4.62109	0.0315812	0.35626
ENSMUSG00000028318	Polr1e	-0.631268	2.3665	4.6209	0.0315846	0.35626
ENSMUSG00000034041	Lyl1	0.843758	0.0536878	4.6166	0.0316639	0.356839
ENSMUSG00000106535	Gm43031	0.683533	0.44322	4.61375	0.0317165	0.357118
ENSMUSG00000020538	Srebf1	0.777247	8.33627	4.60881	0.0318081	0.357835
ENSMUSG00000017144	Rnd3	-0.50958	4.27077	4.59835	0.0320028	0.359708
ENSMUSG00000053063	Clec12a	0.675163	2.39206	4.59514	0.0320628	0.360066
ENSMUSG00000045867	Cradd	0.469616	3.42626	4.58989	0.0321612	0.360764
ENSMUSG00000023055	Calcoco1	0.589499	4.85655	4.58881	0.0321813	0.360764
ENSMUSG00000062691	Cebpzos	0.478394	3.15626	4.57898	0.0323665	0.362134
ENSMUSG00000028329	Xpa	0.586357	3.25175	4.57739	0.0323965	0.362134
ENSMUSG00000072969	Armcx5	0.699333	0.899705	4.57678	0.032408	0.362134
ENSMUSG00000064061	Dzip3	-0.719295	0.692013	4.57632	0.0324168	0.362134
ENSMUSG00000032633	Flcn	0.66833	4.97648	4.57326	0.0324747	0.362464
ENSMUSG00000034160	Ogt	0.567281	7.02815	4.56721	0.0325896	0.363135
ENSMUSG00000033364	Usp37	-0.559414	2.89224	4.56711	0.0325916	0.363135
ENSMUSG00000041782	Lad1	-1.38237	2.19857	4.56467	0.032638	0.363336
ENSMUSG00000037949	Ano10	-0.584741	3.14201	4.55384	0.032845	0.364745
ENSMUSG00000026749	Nek6	-0.577142	5.30104	4.55235	0.0328737	0.364745
ENSMUSG00000019737	Syne4	-1.20472	1.16962	4.5516	0.032888	0.364745
ENSMUSG00000097413	A830052D11Rik	0.913793	-0.164531	4.55067	0.0329059	0.364745
ENSMUSG00000029145	Eif2b4	-0.46318	4.92771	4.5506	0.0329072	0.364745
ENSMUSG00000032120	C2cd2l	-0.55442	5.29457	4.54776	0.0329618	0.365034
ENSMUSG00000079550	Mpp4	-0.761854	2.30498	4.5451	0.0330131	0.365286
ENSMUSG00000038530	Rgs4	-0.650465	1.04713	4.53933	0.0331245	0.366202
ENSMUSG00000017002	Slpi	1.08815	1.00944	4.53467	0.0332148	0.366879
ENSMUSG00000024538	Ppic	0.690859	1.50568	4.53321	0.0332431	0.366879
ENSMUSG00000038068	Rnf144b	-0.473681	5.07866	4.53152	0.0332761	0.366926
ENSMUSG00000039063	Echdc3	0.549775	6.45054	4.52885	0.033328	0.367182
ENSMUSG00000045064	Zc2hc1c	-1.07718	1.86337	4.52721	0.0333599	0.367217
ENSMUSG00000074797	Itpa	-0.548417	4.76412	4.52461	0.0334107	0.367461
ENSMUSG00000020381	Mrnip	0.779734	0.441467	4.52139	0.0334735	0.367835
ENSMUSG00000022057	Adamdec1	0.851695	1.45707	4.51951	0.0335105	0.367925
ENSMUSG00000042303	Sgsm3	-0.506716	3.03262	4.51663	0.0335668	0.368227
ENSMUSG00000097729	2310015A10Rik	0.598847	1.94547	4.51336	0.0336311	0.368616
ENSMUSG00000000440	Pparg	0.903095	3.0703	4.5087	0.0337228	0.369305
ENSMUSG00000001025	S100a6	1.21819	1.03314	4.50613	0.0337736	0.36944
ENSMUSG00000023057	Fabp2	0.528096	5.99351	4.50515	0.0337929	0.36944
ENSMUSG00000037263	Aldh3b3	1.57952	1.72479	4.49885	0.0339177	0.370488
ENSMUSG00000026970	Rbms1	0.555264	4.6541	4.4913	0.0340678	0.370784
ENSMUSG00000039183	Nubp2	-0.428315	4.79108	4.49076	0.0340786	0.370784
ENSMUSG00000055491	Pprc1	-0.546386	3.75954	4.48964	0.0341009	0.370784
ENSMUSG00000046562	Unc119b	-0.492981	4.56057	4.48881	0.0341175	0.370784
ENSMUSG00000031644	Nek1	-0.793249	3.46402	4.48875	0.0341186	0.370784
ENSMUSG00000045435	Tmem60	0.449419	3.72299	4.48874	0.0341187	0.370784
ENSMUSG00000054414	Slc30a7	-0.523252	4.53764	4.48476	0.0341983	0.371099
ENSMUSG00000040345	Arhgap9	0.73347	1.16209	4.48295	0.0342346	0.371099
ENSMUSG00000054408	Spcs3	-0.511363	6.03885	4.48294	0.0342347	0.371099
ENSMUSG00000038244	Mical2	-0.639761	2.97601	4.47771	0.0343398	0.371922
ENSMUSG00000053137	Mapk11	0.704532	0.532768	4.47474	0.0343995	0.372254
ENSMUSG00000054263	Lifr	-0.72224	8.56858	4.47171	0.0344605	0.372599
ENSMUSG00000021715	Cwc27	0.533875	2.15011	4.46883	0.0345187	0.372774
ENSMUSG00000101397	Mug-ps1	0.71957	7.01671	4.4658	0.03458	0.372774
ENSMUSG00000033671	Cep350	-0.440676	4.95356	4.46432	0.0346099	0.372774
ENSMUSG00000005686	Ampd3	0.730082	0.537421	4.46361	0.0346243	0.372774
ENSMUSG00000030498	Gas2	0.678478	4.96575	4.46232	0.0346505	0.372774
ENSMUSG00000022149	C9	-0.583023	8.96192	4.46226	0.0346516	0.372774
ENSMUSG00000012187	Mogat1	1.76266	-0.220152	4.46043	0.0346887	0.37286
ENSMUSG00000069919	Hba-a1	-1.00987	6.54372	4.4552	0.0347951	0.373327
ENSMUSG00000041548	Hspb8	-0.682857	7.40941	4.45342	0.0348313	0.373327
ENSMUSG00000066441	Rdh11	1.04856	5.86013	4.45323	0.0348354	0.373327
ENSMUSG00000026576	Atp1b1	-0.487339	5.58102	4.45256	0.0348489	0.373327
ENSMUSG00000027070	Lrp2	1.01797	-0.291684	4.44679	0.034967	0.374278
ENSMUSG00000047648	Fbxo30	-0.505474	3.30228	4.44402	0.0350237	0.3745
ENSMUSG00000090698	Apold1	0.696533	0.394318	4.44292	0.0350462	0.3745
ENSMUSG00000005674	Tomm40l	0.661535	4.21825	4.43914	0.0351239	0.374744
ENSMUSG00000002831	Plin4	-0.675308	2.73474	4.43896	0.0351277	0.374744
ENSMUSG00000020448	Rnf185	-0.437596	5.03288	4.43292	0.0352522	0.375243
ENSMUSG00000034785	Dio1	-0.748048	7.82686	4.43259	0.0352589	0.375243
ENSMUSG00000025602	Zfp202	1.02948	-0.229482	4.43214	0.0352683	0.375243
ENSMUSG00000045294	Insig1	0.629415	8.50165	4.4305	0.0353022	0.375243
ENSMUSG00000036898	Zfp157	-0.794858	3.30245	4.4285	0.0353435	0.375243
ENSMUSG00000053646	Plxnb1	-0.451742	5.79826	4.42817	0.0353505	0.375243
ENSMUSG00000028700	Pomgnt1	-0.441277	4.10687	4.42612	0.0353928	0.375381
ENSMUSG00000035704	Alg8	-0.495224	3.03642	4.41609	0.0356014	0.37689
ENSMUSG00000038776	Ephx1	0.69026	8.08573	4.41597	0.035604	0.37689
ENSMUSG00000097148	Gm3839	0.595636	2.03604	4.41504	0.0356235	0.37689
ENSMUSG00000020952	Scfd1	-0.642875	5.18001	4.4113	0.0357016	0.377404
ENSMUSG00000052748	Swt1	-0.510773	4.00558	4.40739	0.0357835	0.377958
ENSMUSG00000026933	Camsap1	-0.458481	3.35327	4.40374	0.0358601	0.378455
ENSMUSG00000030701	Plekhb1	0.526735	4.94422	4.39216	0.0361046	0.380179
ENSMUSG00000079495	Nat8f6	-0.709878	0.650496	4.39147	0.0361191	0.380179
ENSMUSG00000032557	Uba5	-0.557659	5.2622	4.38842	0.0361839	0.380179
ENSMUSG00000028672	Hmgcl	0.505634	7.55313	4.38772	0.0361987	0.380179
ENSMUSG00000027219	Slc28a2	0.810664	0.217182	4.38638	0.0362272	0.380179
ENSMUSG00000086332	4930480G23Rik	0.85324	0.588624	4.38633	0.0362283	0.380179
ENSMUSG00000031349	Nsdhl	0.845169	6.40819	4.38617	0.0362316	0.380179
ENSMUSG00000011305	Plin5	-0.627523	5.30572	4.38402	0.0362772	0.380346
ENSMUSG00000107577	Gm44103	0.783652	1.79328	4.38117	0.036338	0.380671
ENSMUSG00000042705	Commd10	0.634829	2.79178	4.37974	0.0363685	0.380679
ENSMUSG00000095061	E030018B13Rik	-1.08228	1.55664	4.37425	0.0364859	0.381595
ENSMUSG00000020175	Rab36	0.82776	1.27247	4.36851	0.036609	0.38257
ENSMUSG00000020246	Hcfc2	-0.51695	3.70111	4.36379	0.0367105	0.383318
ENSMUSG00000027660	Skil	-0.678004	3.47391	4.36096	0.0367716	0.383643
ENSMUSG00000061175	Fnip2	0.570322	4.79988	4.35883	0.0368176	0.383809
ENSMUSG00000051238	Swsap1	-0.54049	2.37874	4.35362	0.0369304	0.384493
ENSMUSG00000097673	Gm26608	0.777376	2.16801	4.35302	0.0369434	0.384493
ENSMUSG00000035021	Baz1a	-0.492148	3.51203	4.3482	0.037048	0.385269
ENSMUSG00000031669	Gins3	-0.797951	-0.0564106	4.34427	0.0371336	0.385356
ENSMUSG00000048772	Tmem53	0.559044	4.38125	4.34422	0.0371347	0.385356
ENSMUSG00000074183	Gsta1	1.27709	0.996908	4.34294	0.0371627	0.385356
ENSMUSG00000045980	Tmem104	-0.49292	3.32828	4.34229	0.0371769	0.385356
ENSMUSG00000026938	Fcna	0.494683	5.49763	4.33683	0.0372964	0.385814
ENSMUSG00000029468	P2rx7	0.642378	1.33154	4.3365	0.0373036	0.385814
ENSMUSG00000040327	Cul9	0.533839	3.1507	4.33508	0.0373347	0.385814
ENSMUSG00000020697	Lig3	-0.496173	3.46046	4.33476	0.0373417	0.385814
ENSMUSG00000000976	Heatr6	-0.51552	3.78451	4.33226	0.0373965	0.386068
ENSMUSG00000093565	Rab26os	-0.69611	1.12736	4.32299	0.0376008	0.387339
ENSMUSG00000082938	Gm2810	0.658267	1.78164	4.32121	0.03764	0.387339
ENSMUSG00000045795	Whamm	0.460023	5.23282	4.32098	0.0376453	0.387339
ENSMUSG00000047656	Trpt1	0.655548	1.74803	4.31892	0.0376909	0.387339
ENSMUSG00000029484	Anxa3	0.69992	2.16095	4.31845	0.0377012	0.387339
ENSMUSG00000024036	Slc37a1	-1.00654	1.20747	4.31813	0.0377083	0.387339
ENSMUSG00000106664	Gm17936	0.702537	0.389365	4.31708	0.0377316	0.387339
ENSMUSG00000020309	Chac2	0.531414	4.60142	4.31475	0.0377834	0.38756
ENSMUSG00000022385	Gtse1	1.22529	0.187141	4.31204	0.0378435	0.387865
ENSMUSG00000025151	Maged1	-0.479289	6.28918	4.30512	0.0379978	0.38906
ENSMUSG00000062040	Zfp27	-0.571077	2.18975	4.30294	0.0380466	0.38906
ENSMUSG00000063972	Nr6a1	0.477945	3.30016	4.30273	0.0380513	0.38906
ENSMUSG00000027864	Ptgfrn	-0.771574	1.58737	4.29763	0.0381655	0.389856
ENSMUSG00000030499	Kctd15	-0.685536	2.91328	4.29654	0.0381901	0.389856
ENSMUSG00000106538	Gm30301	-0.753875	0.872873	4.29386	0.0382503	0.390159
ENSMUSG00000073987	Ggh	0.502511	4.02884	4.29139	0.0383058	0.390414
ENSMUSG00000041132	N4bp2l1	0.656756	6.30342	4.28979	0.0383419	0.390471
ENSMUSG00000096054	Syne1	-0.464028	3.87567	4.28643	0.0384177	0.390931
ENSMUSG00000026779	Mastl	0.721487	0.258102	4.28269	0.0385023	0.391481
ENSMUSG00000106087	Gm43609	0.743802	2.37058	4.27902	0.0385856	0.392016
ENSMUSG00000022000	Zc3h13	-0.461053	4.16164	4.27273	0.0387286	0.393156
ENSMUSG00000079355	Ackr4	0.631569	1.87388	4.26868	0.0388212	0.393725
ENSMUSG00000044468	Tent5c	-0.668182	3.36176	4.26726	0.0388535	0.393725
ENSMUSG00000032067	Pts	0.396664	5.35861	4.26624	0.0388769	0.393725
ENSMUSG00000025212	Sfxn3	0.775505	0.495022	4.26242	0.0389644	0.393968
ENSMUSG00000039936	Pik3cd	0.653123	2.12325	4.26174	0.03898	0.393968
ENSMUSG00000040675	Mthfd1l	-0.690573	0.697071	4.26116	0.0389933	0.393968
ENSMUSG00000058355	Abce1	-0.498536	6.19976	4.25404	0.0391572	0.395311
ENSMUSG00000015890	Amdhd1	0.551631	7.15788	4.2499	0.0392526	0.395962
ENSMUSG00000024750	Zfand5	0.467076	5.31308	4.24636	0.0393345	0.396409
ENSMUSG00000029656	C8b	-0.586674	8.10999	4.24531	0.0393589	0.396409
ENSMUSG00000036452	Arhgap26	-0.678286	4.53911	4.24275	0.0394183	0.396695
ENSMUSG00000036087	Slain2	-0.441218	4.77928	4.24119	0.0394544	0.396723
ENSMUSG00000068083	Cyp2d40	-0.700822	6.27181	4.23996	0.0394831	0.396723
ENSMUSG00000048938	Nr1h5	0.897506	2.21648	4.23617	0.0395713	0.397297
ENSMUSG00000097204	Gm17690	0.848864	-0.274456	4.23408	0.0396201	0.397475
ENSMUSG00000078349	AW011738	-0.799991	0.949255	4.23156	0.039679	0.397754
ENSMUSG00000110123	Gm18562	-0.748347	1.22758	4.22965	0.0397236	0.397889
ENSMUSG00000022094	Slc39a14	-0.47188	7.79685	4.22227	0.0398967	0.398862
ENSMUSG00000089827	1700023H06Rik	1.45709	0.69814	4.22217	0.039899	0.398862
ENSMUSG00000025880	Smad7	0.999368	3.31191	4.22153	0.0399142	0.398862
ENSMUSG00000009687	Fxyd5	0.597083	2.02786	4.21933	0.039966	0.399067
ENSMUSG00000028949	Smarcd3	0.710111	0.603253	4.21703	0.0400202	0.399296
ENSMUSG00000049600	Zbtb45	0.591364	3.8181	4.21427	0.0400853	0.399379
ENSMUSG00000066979	Bub3	-0.423	4.79072	4.21403	0.0400909	0.399379
ENSMUSG00000022557	Bop1	-0.504027	4.6069	4.20967	0.0401942	0.399934
ENSMUSG00000071633	Gm4952	0.698464	5.56052	4.20904	0.0402091	0.399934
ENSMUSG00000107605	Gm44117	1.32386	0.859541	4.20286	0.0403558	0.401029
ENSMUSG00000049323	Smcr8	-0.417682	4.63714	4.20177	0.0403819	0.401029
ENSMUSG00000074916	Chst14	0.685412	0.707159	4.19604	0.0405186	0.401823
ENSMUSG00000034774	Dsg1c	1.45913	2.68196	4.19578	0.0405247	0.401823
ENSMUSG00000040918	Slc19a2	0.426914	6.62969	4.19311	0.0405886	0.401986
ENSMUSG00000056076	Eif3b	-0.423455	6.4108	4.19168	0.0406229	0.401986
ENSMUSG00000031845	Bco1	-0.612794	2.30209	4.18937	0.0406781	0.401986
ENSMUSG00000048388	Fam171b	-1.71872	1.88175	4.18871	0.0406941	0.401986
ENSMUSG00000030159	Clec1b	0.551791	3.41762	4.18853	0.0406983	0.401986
ENSMUSG00000025037	Maoa	0.660728	3.42707	4.18672	0.0407419	0.402106
ENSMUSG00000028270	Gbp2	0.626738	2.39132	4.18291	0.0408334	0.402699
ENSMUSG00000072704	Smim10l1	0.436538	6.40625	4.18119	0.040875	0.402738
ENSMUSG00000030123	Plxnd1	0.514789	4.70949	4.17985	0.0409074	0.402738
ENSMUSG00000020458	Rtn4	-0.525762	5.91568	4.17883	0.0409318	0.402738
ENSMUSG00000039519	Cyp7b1	-0.825455	8.20679	4.17145	0.0411107	0.404187
ENSMUSG00000034308	Sdr42e1	0.487921	6.57057	4.16952	0.0411576	0.404337
ENSMUSG00000063931	Pepd	-0.414872	5.67814	4.16803	0.0411936	0.40438
ENSMUSG00000072623	Zfp9	-1.30181	2.00522	4.16636	0.0412343	0.404469
ENSMUSG00000037031	Tspan15	0.687892	1.56919	4.16503	0.0412668	0.404478
ENSMUSG00000067825	Pex26	-0.471104	5.40627	4.16155	0.0413516	0.404999
ENSMUSG00000063480	Snu13	-0.460944	4.30191	4.156	0.0414872	0.405943
ENSMUSG00000020340	Cyfip2	0.717972	0.700493	4.15406	0.0415348	0.405943
ENSMUSG00000019433	Gipc1	0.483999	3.04756	4.15372	0.0415432	0.405943
ENSMUSG00000090015	Gm15446	0.544513	2.48589	4.15018	0.0416301	0.406481
ENSMUSG00000003226	Ranbp2	-0.613608	6.34481	4.14843	0.0416731	0.406591
ENSMUSG00000027828	Ssr3	-0.660946	7.93829	4.14566	0.0417413	0.406945
ENSMUSG00000090264	Eif4ebp3	-1.33866	3.38089	4.14222	0.0418264	0.407316
ENSMUSG00000019969	Psen1	-0.415499	4.90446	4.14091	0.0418587	0.407316
ENSMUSG00000021413	Prpf4b	-0.467989	5.54239	4.14026	0.0418748	0.407316
ENSMUSG00000020695	Mrc2	0.710909	0.304411	4.13858	0.0419163	0.407409
ENSMUSG00000031965	Tbx20	0.575309	1.12587	4.13619	0.0419756	0.407677
ENSMUSG00000110439	Mup22	-0.663346	8.53909	4.13343	0.0420441	0.408032
ENSMUSG00000041378	Cldn5	0.582142	2.56925	4.13043	0.0421188	0.408126
ENSMUSG00000035954	Dock4	0.479488	4.14921	4.13005	0.0421282	0.408126
ENSMUSG00000030104	Edem1	-0.597035	7.30247	4.12919	0.0421495	0.408126
ENSMUSG00000028035	Dnajb4	-0.445681	5.02656	4.12713	0.0422009	0.408299
ENSMUSG00000074646	6430550D23Rik	0.642517	1.05028	4.12591	0.0422312	0.408299
ENSMUSG00000019055	Plod1	-0.457796	5.31526	4.12093	0.0423557	0.409101
ENSMUSG00000024330	Col11a2	-0.799526	0.935566	4.12004	0.0423781	0.409101
ENSMUSG00000029387	Gtf2h3	-0.440845	3.62253	4.1139	0.0425323	0.410091
ENSMUSG00000024300	Myo1f	0.745137	1.24863	4.11298	0.0425554	0.410091
ENSMUSG00000000093	Tbx2	0.805832	1.45581	4.11118	0.0426005	0.410091
ENSMUSG00000032806	Slc10a3	-0.561283	2.16162	4.11085	0.0426089	0.410091
ENSMUSG00000031618	Nr3c2	0.874893	3.28379	4.10768	0.0426888	0.410551
ENSMUSG00000038034	Igsf8	0.589887	3.21495	4.10501	0.0427562	0.41089
ENSMUSG00000073680	Tmem88b	0.699585	1.81641	4.1027	0.0428148	0.411136
ENSMUSG00000049288	Lix1l	0.5355	1.95975	4.10147	0.0428461	0.411136
ENSMUSG00000076614	Ighg1	1.83146	2.09641	4.09937	0.0428991	0.411219
ENSMUSG00000021365	Nedd9	-0.647928	1.68179	4.09859	0.042919	0.411219
ENSMUSG00000040441	Slc26a10	0.782245	2.68988	4.09601	0.0429845	0.411538
ENSMUSG00000032417	Rwdd2a	1.71074	0.312649	4.09107	0.0431104	0.412435
ENSMUSG00000095742	CAAA01147332.1	1.22538	1.6179	4.08774	0.0431954	0.412913
ENSMUSG00000040699	Limd2	0.451009	4.27359	4.08658	0.043225	0.412913
ENSMUSG00000027534	Snx16	-0.67776	1.11467	4.08489	0.0432683	0.412967
ENSMUSG00000024083	Pja2	-0.613575	4.86061	4.08384	0.0432952	0.412967
ENSMUSG00000032641	Gpr19	-0.561381	1.42334	4.08054	0.0433799	0.413193
ENSMUSG00000086265	Marcksl1-ps4	0.758432	2.48151	4.08034	0.043385	0.413193
ENSMUSG00000021209	Ppp4r4	-0.575685	3.71661	4.07914	0.0434158	0.413193
ENSMUSG00000030249	Abcc9	0.419746	4.48124	4.06966	0.0436602	0.41521
ENSMUSG00000052593	Adam17	-0.40631	4.24628	4.06041	0.0438998	0.417158
ENSMUSG00000086040	Wipf3	0.534133	3.25152	4.05876	0.0439428	0.417158
ENSMUSG00000022894	Adamts5	0.797669	0.647734	4.05799	0.0439629	0.417158
ENSMUSG00000028744	Pqlc2	0.436021	3.49593	4.0524	0.0441085	0.418229
ENSMUSG00000025742	Prps2	0.575521	3.70817	4.04477	0.0443085	0.419787
ENSMUSG00000032332	Col12a1	-0.851974	0.739345	4.04225	0.0443746	0.419787
ENSMUSG00000029380	Cxcl1	-1.33168	4.77148	4.04009	0.0444316	0.419787
ENSMUSG00000040177	2310057M21Rik	-0.55419	1.75393	4.03999	0.044434	0.419787
ENSMUSG00000075324	Fign	0.619155	2.13595	4.03988	0.0444369	0.419787
ENSMUSG00000014859	E2f4	-0.413991	3.86613	4.03379	0.0445978	0.420996
ENSMUSG00000020268	Lyrm7	-0.672351	0.715767	4.0271	0.0447748	0.422356
ENSMUSG00000045302	Preb	-0.456681	6.46075	4.01594	0.0450722	0.424093
ENSMUSG00000054191	Klf1	0.678058	1.99482	4.01573	0.0450776	0.424093
ENSMUSG00000038312	Edem2	-0.496699	5.55984	4.01507	0.0450953	0.424093
ENSMUSG00000031129	Slc9a9	0.676557	1.90604	4.01466	0.0451064	0.424093
ENSMUSG00000043924	Ncmap	0.806881	1.46162	4.01396	0.045125	0.424093
ENSMUSG00000038768	9130409I23Rik	1.17182	3.94202	4.01273	0.0451579	0.424093
ENSMUSG00000006390	Elovl1	-0.542297	5.16059	4.01007	0.0452293	0.424405
ENSMUSG00000084983	Gm11789	-0.407527	4.81333	4.00902	0.0452574	0.424405
ENSMUSG00000061292	Cyp3a59	0.88719	4.94142	4.00685	0.0453157	0.42464
ENSMUSG00000026950	Neb	0.509515	4.17011	4.005	0.0453655	0.424785
ENSMUSG00000021287	Xrcc3	0.518297	2.20292	4.00224	0.0454398	0.424785
ENSMUSG00000031633	Slc25a4	0.513744	2.47118	3.99987	0.0455037	0.424785
ENSMUSG00000082292	Gm12250	0.845246	0.512582	3.99945	0.0455152	0.424785
ENSMUSG00000105802	Gm43012	0.633914	1.00105	3.99907	0.0455253	0.424785
ENSMUSG00000009108	Gnat2	-0.751054	-0.232202	3.99888	0.0455305	0.424785
ENSMUSG00000059810	Rgs3	-0.855689	3.66491	3.99451	0.0456487	0.424874
ENSMUSG00000062995	Ica1	-0.657977	0.87688	3.99363	0.0456726	0.424874
ENSMUSG00000019960	Dusp6	0.587215	4.99678	3.99257	0.0457014	0.424874
ENSMUSG00000025194	Abcc2	0.580999	8.85435	3.99138	0.0457336	0.424874
ENSMUSG00000015869	Prpsap1	0.504048	5.88413	3.99075	0.0457508	0.424874
ENSMUSG00000090737	Gm6788	-1.15638	0.92088	3.98676	0.045859	0.424874
ENSMUSG00000028919	Arhgef19	-0.693922	5.46881	3.98517	0.0459026	0.424874
ENSMUSG00000030805	Stx4a	0.419999	4.59858	3.98445	0.0459221	0.424874
ENSMUSG00000056290	Ms4a4b	1.07126	-0.491692	3.97914	0.046067	0.424874
ENSMUSG00000056537	Rlim	-0.428536	5.22377	3.97907	0.0460689	0.424874
ENSMUSG00000086544	Chn1os3	0.712801	1.42404	3.97811	0.0460952	0.424874
ENSMUSG00000027762	Sucnr1	1.21156	5.22122	3.97491	0.0461828	0.424874
ENSMUSG00000016477	E2f3	-0.520513	2.63406	3.97464	0.0461904	0.424874
ENSMUSG00000020902	Ntn1	0.553182	2.99896	3.97407	0.046206	0.424874
ENSMUSG00000046949	Nqo2	0.571325	6.4362	3.97215	0.0462588	0.424874
ENSMUSG00000022905	Kpna1	-0.44565	5.47835	3.97139	0.0462797	0.424874
ENSMUSG00000010122	Slc47a1	0.46209	7.46852	3.971	0.0462901	0.424874
ENSMUSG00000035864	Syt1	0.644699	3.36432	3.96905	0.046344	0.424874
ENSMUSG00000027692	Tnik	0.629036	1.56784	3.96839	0.0463621	0.424874
ENSMUSG00000041750	Cd1d2	0.493887	3.54154	3.96741	0.0463891	0.424874
ENSMUSG00000098747	Gm27216	0.490881	4.11447	3.96722	0.0463942	0.424874
ENSMUSG00000042675	Ypel3	0.686955	5.23407	3.96687	0.0464038	0.424874
ENSMUSG00000021594	Srd5a1	-0.568286	6.27598	3.96538	0.046445	0.424874
ENSMUSG00000026014	Raph1	-0.442039	6.07938	3.96443	0.0464712	0.424874
ENSMUSG00000018068	Ints2	-0.659234	2.65179	3.96408	0.046481	0.424874
ENSMUSG00000054099	Slc25a40	0.538763	2.07971	3.96355	0.0464955	0.424874
ENSMUSG00000026836	Acvr1	-0.498929	3.57588	3.96268	0.0465196	0.424874
ENSMUSG00000080972	Gm16061	1.08068	0.203701	3.96266	0.04652	0.424874
ENSMUSG00000032492	Pth1r	0.566044	3.00876	3.96202	0.0465379	0.424874
ENSMUSG00000001467	Cyp51	0.686356	7.18671	3.96133	0.046557	0.424874
ENSMUSG00000004069	Dnaja3	-0.390106	6.32992	3.96087	0.0465698	0.424874
ENSMUSG00000036478	Btg1	0.454501	5.36311	3.95867	0.0466304	0.424952
ENSMUSG00000029630	Cyp3a25	0.756358	9.52989	3.95784	0.0466535	0.424952
ENSMUSG00000030878	Cdr2	-0.93395	-0.071701	3.95696	0.0466779	0.424952
ENSMUSG00000028849	Map7d1	-0.569343	4.69039	3.95316	0.0467836	0.425611
ENSMUSG00000000168	Dlat	0.54701	5.24466	3.95083	0.0468481	0.425895
ENSMUSG00000078580	E430018J23Rik	-0.605912	2.15138	3.94768	0.046936	0.426082
ENSMUSG00000039740	Alg2	-0.506406	4.02005	3.94566	0.0469925	0.426082
ENSMUSG00000025041	Nt5c2	0.451331	3.97481	3.94488	0.0470141	0.426082
ENSMUSG00000037788	Vopp1	0.590267	1.80355	3.94458	0.0470226	0.426082
ENSMUSG00000020926	Adam11	0.834806	3.57205	3.94307	0.0470649	0.426082
ENSMUSG00000097336	Fendrr	0.92376	2.21038	3.94271	0.0470749	0.426082
ENSMUSG00000101856	1700096K18Rik	0.67353	0.21887	3.94077	0.0471292	0.426082
ENSMUSG00000038517	Tbkbp1	0.464696	3.11402	3.94002	0.0471503	0.426082
ENSMUSG00000020701	Tmem132e	0.743819	0.934779	3.9382	0.0472013	0.426082
ENSMUSG00000039982	Dtx4	-0.576805	2.04917	3.93692	0.0472372	0.426082
ENSMUSG00000052056	Zfp217	-0.458951	3.26143	3.93511	0.0472879	0.426082
ENSMUSG00000022453	Naga	0.516102	4.71362	3.93437	0.0473089	0.426082
ENSMUSG00000039633	Lonrf1	-0.891139	3.72787	3.93356	0.0473315	0.426082
ENSMUSG00000038954	Supt3	0.602953	2.29654	3.93344	0.047335	0.426082
ENSMUSG00000061825	Ces2c	-0.841441	5.85657	3.93045	0.0474193	0.42654
ENSMUSG00000043833	2900005J15Rik	0.725715	1.58136	3.92893	0.0474622	0.426626
ENSMUSG00000028256	Odf2l	0.494136	2.99367	3.92621	0.0475389	0.427015
ENSMUSG00000030161	Gabarapl1	0.641359	7.82712	3.92401	0.0476013	0.42705
ENSMUSG00000040463	Mybbp1a	-0.442497	5.47924	3.92372	0.0476095	0.42705
ENSMUSG00000026577	Blzf1	-0.46046	3.26409	3.9205	0.0477006	0.427567
ENSMUSG00000086043	Gm12473	0.982545	0.217186	3.91906	0.0477417	0.427636
ENSMUSG00000087138	Gm15545	0.659135	1.5651	3.91386	0.0478894	0.428659
ENSMUSG00000000317	Bcl6b	0.668516	1.04896	3.91039	0.0479885	0.429222
ENSMUSG00000106788	Gm43449	0.909963	0.953854	3.90931	0.0480194	0.429222
ENSMUSG00000041779	Tram2	0.555743	3.40058	3.90626	0.0481065	0.4297
ENSMUSG00000023249	Parp3	0.397902	4.83497	3.90103	0.0482565	0.430475
ENSMUSG00000073489	Ifi204	0.619974	2.67534	3.9002	0.0482805	0.430475
ENSMUSG00000036315	Znrd1	-0.545516	3.55348	3.89972	0.0482942	0.430475
ENSMUSG00000053091	Lins1	-0.529586	2.22037	3.89544	0.0484174	0.431121
ENSMUSG00000038150	Ormdl3	-0.427068	6.36483	3.89212	0.0485132	0.431121
ENSMUSG00000003134	Tbc1d8	-0.392226	4.32436	3.892	0.0485167	0.431121
ENSMUSG00000031561	Tenm3	0.776998	3.04818	3.89071	0.0485539	0.431121
ENSMUSG00000033294	Noc4l	-0.56711	3.50271	3.8894	0.0485918	0.431121
ENSMUSG00000032042	Srpr	-0.435133	7.1853	3.889	0.0486034	0.431121
ENSMUSG00000006717	Acot13	0.389513	6.1105	3.88821	0.0486262	0.431121
ENSMUSG00000036372	Tmem258	-0.51304	5.48867	3.88786	0.0486364	0.431121
ENSMUSG00000103898	Gm30238	0.778105	0.475611	3.88585	0.0486946	0.431338
ENSMUSG00000014075	Tctex1d2	0.659845	0.360104	3.88192	0.0488087	0.431913
ENSMUSG00000097564	C430014B12Rik	0.79606	0.166247	3.87976	0.0488715	0.431913
ENSMUSG00000054484	Tmem62	-0.450828	3.52857	3.87897	0.0488945	0.431913
ENSMUSG00000078452	Raet1d	1.35441	3.41738	3.87808	0.0489204	0.431913
ENSMUSG00000034035	Ccdc17	0.507216	2.32663	3.87781	0.0489284	0.431913
ENSMUSG00000016495	Plgrkt	0.539282	2.99228	3.87565	0.0489914	0.432172
ENSMUSG00000040396	Abhd13	-0.45582	4.48206	3.87438	0.0490284	0.4322
ENSMUSG00000042628	Zfyve1	-0.464602	5.63158	3.86784	0.0492197	0.433259
ENSMUSG00000067389	Gm17080	1.08138	2.42869	3.86767	0.0492247	0.433259
ENSMUSG00000022762	Ncam2	1.03794	0.599221	3.86681	0.0492502	0.433259
ENSMUSG00000068267	Cenpb	0.398724	5.85906	3.8644	0.0493207	0.433582
ENSMUSG00000090210	Itga10	-0.966224	1.38341	3.86016	0.0494457	0.434184
ENSMUSG00000030269	Mtmr14	-0.432577	4.16726	3.85974	0.049458	0.434184
ENSMUSG00000034645	Zyg11a	-1.01773	2.19753	3.85862	0.0494911	0.434184
ENSMUSG00000047843	Bri3	0.405015	4.77028	3.85326	0.0496495	0.435129
ENSMUSG00000011427	Zfp790	-0.538755	2.79001	3.85221	0.0496806	0.435129
ENSMUSG00000001910	Nacc1	-0.504552	4.20066	3.85152	0.0497009	0.435129
ENSMUSG00000015968	Cacna1d	0.553847	1.76102	3.84824	0.0497983	0.435587
ENSMUSG00000008167	Fbxw9	0.478875	4.78468	3.84625	0.0498574	0.435587
ENSMUSG00000029388	Eif2b1	-0.403221	4.77403	3.84564	0.0498756	0.435587
ENSMUSG00000036983	Tfb1m	-0.540169	2.80754	3.84517	0.0498894	0.435587
ENSMUSG00000043962	Thrap3	0.374199	5.69858	3.84383	0.0499293	0.435589
ENSMUSG00000037872	Ackr1	-0.898033	0.652095	3.84143	0.0500007	0.435589
ENSMUSG00000002847	Pla1a	0.402008	5.73506	3.84046	0.0500297	0.435589
ENSMUSG00000023832	Acat2	0.644294	6.725	3.83972	0.050052	0.435589
ENSMUSG00000081643	Gm11605	0.717461	-0.131943	3.83945	0.0500599	0.435589
ENSMUSG00000032224	Fam81a	-0.580573	1.08189	3.83455	0.0502064	0.436567
ENSMUSG00000002068	Ccne1	-0.834626	1.58775	3.82944	0.0503597	0.437406
ENSMUSG00000106040	Cyp3a63-ps	-2.94033	3.90488	3.82906	0.0503713	0.437406
ENSMUSG00000028173	Wls	0.54409	2.23136	3.82705	0.0504318	0.437433
ENSMUSG00000003234	Abcf3	-0.418127	5.55808	3.82668	0.0504428	0.437433
ENSMUSG00000004655	Aqp1	0.55076	6.54745	3.82459	0.0505056	0.437504
ENSMUSG00000033526	Ppip5k1	-0.636508	2.11073	3.82337	0.0505425	0.437504
ENSMUSG00000033400	Agl	0.507759	5.96457	3.823	0.0505536	0.437504
ENSMUSG00000020248	Nfyb	0.406812	4.87917	3.82082	0.0506194	0.437777
ENSMUSG00000022802	Lmln	-0.663003	1.28464	3.80952	0.050962	0.439535
ENSMUSG00000031844	Hsd17b2	-0.428109	6.93159	3.80888	0.0509816	0.439535
ENSMUSG00000060681	Slc9a6	-0.52027	3.62326	3.80825	0.0510006	0.439535
ENSMUSG00000026622	Nek2	-0.801338	0.322415	3.80745	0.0510251	0.439535
ENSMUSG00000048058	Ldlrad3	0.630675	2.58586	3.80741	0.0510264	0.439535
ENSMUSG00000032802	Srxn1	0.54471	4.57577	3.80733	0.0510289	0.439535
ENSMUSG00000022528	Hes1	0.678651	3.21439	3.80424	0.0511229	0.440049
ENSMUSG00000044712	Slc38a6	0.472034	3.12501	3.79964	0.0512637	0.440857
ENSMUSG00000078671	Chd2	0.440689	4.9268	3.79892	0.0512857	0.440857
ENSMUSG00000087478	4930506C21Rik	0.834571	0.812765	3.79777	0.0513207	0.440862
ENSMUSG00000024414	Mrpl27	0.399876	5.32447	3.79467	0.0514161	0.441385
ENSMUSG00000028018	Gstcd	-0.611167	1.29951	3.79228	0.0514894	0.441682
ENSMUSG00000026565	Pou2f1	0.515537	2.4612	3.79125	0.051521	0.441682
ENSMUSG00000025228	Actr1a	-0.382432	5.66677	3.79017	0.0515543	0.441682
ENSMUSG00000078964	Ces1b	-1.0677	7.4634	3.7875	0.0516367	0.442092
ENSMUSG00000039759	Thap3	0.489461	3.10812	3.78384	0.0517499	0.442764
ENSMUSG00000033032	Afap1l1	0.550924	1.84627	3.77986	0.0518731	0.443422
ENSMUSG00000074657	Kif5a	0.765224	1.76352	3.77865	0.0519105	0.443422
ENSMUSG00000022439	Parvg	0.715387	0.464829	3.77743	0.0519484	0.443422
ENSMUSG00000012017	Scarf2	0.647098	1.52821	3.77522	0.0520171	0.443422
ENSMUSG00000038023	Atp6v0a2	-0.380955	4.9551	3.77443	0.0520416	0.443422
ENSMUSG00000079045	Prox1os	0.651323	3.41459	3.77412	0.0520514	0.443422
ENSMUSG00000001270	Ckb	0.604555	2.20669	3.77354	0.0520695	0.443422
ENSMUSG00000022270	Retreg1	0.473704	5.3065	3.77047	0.0521651	0.443443
ENSMUSG00000081952	Gm12178	-0.689985	1.04245	3.7687	0.0522202	0.443443
ENSMUSG00000097310	A930038B10Rik	0.60933	1.63664	3.76842	0.0522291	0.443443
ENSMUSG00000057894	Zfp329	-0.506693	2.77759	3.76797	0.0522431	0.443443
ENSMUSG00000026107	Nabp1	-0.543137	4.15092	3.7679	0.0522453	0.443443
ENSMUSG00000071632	2510002D24Rik	0.529845	3.60201	3.76558	0.0523176	0.44367
ENSMUSG00000034165	Ccnd3	-0.423945	4.58196	3.76482	0.0523414	0.44367
ENSMUSG00000026692	Fmo4	0.532656	3.8287	3.761	0.052461	0.44439
ENSMUSG00000001870	Ltbp1	0.547687	1.04655	3.75823	0.0525481	0.444833
ENSMUSG00000003992	Ssbp2	0.721931	1.01359	3.7545	0.0526656	0.445533
ENSMUSG00000033910	Gucy1a1	0.499803	2.46654	3.75171	0.0527534	0.445875
ENSMUSG00000019295	Tmem129	-0.389713	4.59418	3.75101	0.0527757	0.445875
ENSMUSG00000017466	Timp2	0.450181	3.28733	3.74347	0.0530142	0.447594
ENSMUSG00000031709	Tbc1d9	0.79067	0.263591	3.74064	0.053104	0.448056
ENSMUSG00000005447	Pafah1b3	0.602333	1.2446	3.7368	0.0532262	0.448617
ENSMUSG00000089635	Gm16559	0.54769	3.04042	3.73593	0.0532539	0.448617
ENSMUSG00000025268	Maged2	0.557577	2.11598	3.7346	0.0532964	0.448617
ENSMUSG00000103421	Golt1a	0.60568	0.93114	3.73415	0.0533107	0.448617
ENSMUSG00000097504	4930516B21Rik	1.1125	1.74595	3.73054	0.0534262	0.449293
ENSMUSG00000031848	Lsm4	0.505262	3.90888	3.72418	0.0536299	0.450602
ENSMUSG00000001521	Tulp3	0.72707	0.419455	3.72348	0.0536524	0.450602
ENSMUSG00000035697	Arhgap45	0.544911	3.5853	3.71947	0.0537816	0.451391
ENSMUSG00000002957	Ap2a2	-0.387392	5.81684	3.71793	0.0538312	0.451511
ENSMUSG00000046546	Fam43a	0.522441	1.85874	3.71618	0.0538877	0.451613
ENSMUSG00000019647	Sema6a	0.549855	2.31325	3.71431	0.0539479	0.451613
ENSMUSG00000026923	Notch1	0.484181	3.06114	3.71427	0.0539493	0.451613
ENSMUSG00000021911	Parg	-0.431917	3.74316	3.71288	0.053994	0.451692
ENSMUSG00000034911	Ushbp1	0.578001	3.95738	3.71148	0.0540394	0.451776
ENSMUSG00000049421	Zfp260	-0.501428	4.59756	3.70594	0.0542192	0.452984
ENSMUSG00000057531	Dtnbp1	0.44389	4.73163	3.70321	0.0543078	0.453395
ENSMUSG00000031198	Fundc2	0.533272	2.58555	3.70224	0.0543394	0.453395
ENSMUSG00000039795	Zfand1	0.41428	4.39935	3.70018	0.0544065	0.45366
ENSMUSG00000002658	Gtf2f1	-0.503939	4.17915	3.69745	0.0544957	0.454107
ENSMUSG00000103711	Tstd1	-0.674907	4.10833	3.69507	0.0545735	0.454169
ENSMUSG00000025332	Kdm5c	-0.446052	5.61345	3.69505	0.0545741	0.454169
ENSMUSG00000037235	Mxd4	-0.459558	5.7509	3.68694	0.05484	0.455831
ENSMUSG00000060373	Hnrnpc	-0.461964	6.52074	3.68641	0.0548577	0.455831
ENSMUSG00000020088	Sar1a	-0.400437	6.4857	3.68571	0.0548807	0.455831
ENSMUSG00000030852	Tacc2	-0.625629	3.80873	3.68329	0.0549604	0.456196
ENSMUSG00000091655	Gm8741	-0.500135	2.37084	3.67708	0.0551654	0.457601
ENSMUSG00000049038	Mterf2	0.82338	0.934982	3.67521	0.0552272	0.457816
ENSMUSG00000036641	Ccdc148	0.806599	0.525392	3.67241	0.0553201	0.45829
ENSMUSG00000028899	Taf12	-0.422406	3.86571	3.67058	0.0553809	0.458497
ENSMUSG00000036278	Macrod1	0.58862	4.98988	3.66897	0.0554344	0.458642
ENSMUSG00000008373	Prpf31	-0.437111	3.40888	3.66408	0.0555972	0.459321
ENSMUSG00000079263	Gm6614	1.88738	4.694	3.6639	0.0556033	0.459321
ENSMUSG00000073830	Mup14	-0.965928	10.3546	3.66328	0.0556241	0.459321
ENSMUSG00000078680	Mup10	-0.666424	11.0154	3.66128	0.0556907	0.459523
ENSMUSG00000022538	Lsg1	-0.391349	4.34474	3.6586	0.0557803	0.459523
ENSMUSG00000033105	Lss	0.763984	5.9539	3.65763	0.0558129	0.459523
ENSMUSG00000041153	Osgin2	-0.831511	1.17957	3.65698	0.0558346	0.459523
ENSMUSG00000037379	Spon2	0.800113	0.262797	3.65578	0.0558749	0.459523
ENSMUSG00000019990	Pde7b	0.773839	1.47798	3.65496	0.0559026	0.459523
ENSMUSG00000030337	Vamp1	0.452186	3.11709	3.6541	0.0559313	0.459523
ENSMUSG00000051550	Zfp579	0.81719	2.45322	3.65278	0.0559757	0.459523
ENSMUSG00000006169	Clint1	-0.470094	5.02999	3.65268	0.0559792	0.459523
ENSMUSG00000035891	Cerk	0.693202	1.41788	3.65182	0.0560078	0.459523
ENSMUSG00000040283	Btnl9	-0.663377	2.51832	3.64892	0.0561056	0.46003
ENSMUSG00000042992	Borcs5	-0.450288	2.81486	3.64749	0.0561539	0.460069
ENSMUSG00000090136	Gm10177	-0.683461	3.07153	3.64665	0.0561823	0.460069
ENSMUSG00000042812	Foxf1	0.587961	0.983991	3.64217	0.0563335	0.461012
ENSMUSG00000053730	Tmem39b	-0.536517	1.5844	3.63848	0.0564586	0.46174
ENSMUSG00000030704	Rab6a	-0.440954	5.51293	3.63464	0.0565888	0.462419
ENSMUSG00000042408	Zmym6	-0.461069	2.60143	3.6339	0.0566139	0.462419
ENSMUSG00000026754	Golga1	-0.459031	4.53969	3.63079	0.05672	0.46299
ENSMUSG00000068923	Syt11	-0.667736	0.911766	3.6274	0.0568356	0.463638
ENSMUSG00000038736	Nudcd1	-0.63082	3.71011	3.6257	0.0568937	0.463816
ENSMUSG00000027624	Epb41l1	0.610244	0.672721	3.62357	0.0569665	0.464114
ENSMUSG00000031871	Cdh5	0.455067	3.87852	3.6216	0.0570339	0.464367
ENSMUSG00000039163	Cmc1	0.398603	4.33396	3.61769	0.0571681	0.464882
ENSMUSG00000031803	B3gnt3	0.602854	0.962603	3.61764	0.0571699	0.464882
ENSMUSG00000095193	Gm20939	0.792538	0.23463	3.61618	0.0572202	0.464996
ENSMUSG00000048495	Tyw5	0.447965	2.65114	3.61456	0.0572759	0.465153
ENSMUSG00000038366	Lasp1	-0.482479	5.74497	3.61299	0.0573301	0.465298
ENSMUSG00000016494	Cd34	1.08831	1.00125	3.61163	0.057377	0.465383
ENSMUSG00000034007	Scaper	0.635384	2.24943	3.61031	0.0574226	0.465458
ENSMUSG00000059586	Nsmce2	0.434102	3.00384	3.60709	0.0575337	0.466063
ENSMUSG00000039783	Kmo	-0.438066	8.20694	3.60545	0.0575904	0.466227
ENSMUSG00000038279	Nop2	-0.401661	4.42115	3.59646	0.0579027	0.468459
ENSMUSG00000001105	Ift20	-0.400012	5.55836	3.59398	0.0579894	0.468863
ENSMUSG00000089694	Nat8f7	-1.41558	1.48692	3.59283	0.0580294	0.468891
ENSMUSG00000012422	Tmem167	-0.500424	5.6493	3.5909	0.0580968	0.469139
ENSMUSG00000009828	Ick	-0.533778	3.85201	3.58686	0.0582383	0.469985
ENSMUSG00000030323	Ift122	-0.554265	1.29078	3.5838	0.0583457	0.470546
ENSMUSG00000021610	Clptm1l	-0.440714	6.24486	3.58278	0.0583814	0.470546
ENSMUSG00000019947	Arid5b	-1.14443	4.51438	3.57957	0.0584942	0.471158
ENSMUSG00000039164	Naif1	-0.787318	1.70531	3.57841	0.0585352	0.471191
ENSMUSG00000020287	Mpg	0.556848	2.04362	3.57637	0.0586071	0.471474
ENSMUSG00000021493	Pdlim7	-0.547032	2.35861	3.57282	0.0587324	0.47202
ENSMUSG00000024587	Nars	-0.46547	6.55707	3.57236	0.0587488	0.47202
ENSMUSG00000021288	Klc1	0.437348	4.05156	3.56178	0.0591244	0.474739
ENSMUSG00000097379	Gm26873	0.724956	1.05403	3.55935	0.0592108	0.475135
ENSMUSG00000013089	Etv5	-0.632403	1.6692	3.55593	0.0593329	0.475817
ENSMUSG00000027244	Atg13	-0.458882	5.44809	3.55112	0.0595054	0.476901
ENSMUSG00000052415	Tchh	-1.30824	0.984266	3.54962	0.0595589	0.477031
ENSMUSG00000031608	Galnt7	-0.62719	1.28192	3.54748	0.0596361	0.477189
ENSMUSG00000049932	H2ax	-0.884717	2.66422	3.54645	0.0596729	0.477189
ENSMUSG00000043789	Vwce	0.373211	5.11506	3.54594	0.0596915	0.477189
ENSMUSG00000029095	Ablim2	0.556448	1.37649	3.54493	0.0597279	0.477189
ENSMUSG00000034429	Zfp707	0.58953	5.13196	3.54313	0.0597924	0.477354
ENSMUSG00000033871	Ppargc1b	0.639486	1.55757	3.54228	0.0598232	0.477354
ENSMUSG00000030793	Pycard	0.651844	0.36889	3.54073	0.059879	0.477501
ENSMUSG00000006456	Rbm14	-0.473435	3.86799	3.5376	0.0599923	0.478107
ENSMUSG00000037601	Nme1	-0.488721	5.26202	3.53336	0.0601458	0.479031
ENSMUSG00000045838	Ccdc9b	0.556155	1.49827	3.53176	0.0602038	0.479182
ENSMUSG00000084899	Gm15344	-1.32642	1.52948	3.53013	0.0602631	0.479182
ENSMUSG00000023809	Rps6ka2	0.666266	0.438984	3.52889	0.0603083	0.479182
ENSMUSG00000021408	Ripk1	-0.488393	4.00847	3.52788	0.0603449	0.479182
ENSMUSG00000090124	Ugt1a7c	0.961041	0.760113	3.52768	0.060352	0.479182
ENSMUSG00000031864	Ints10	-0.559548	2.9392	3.52508	0.0604468	0.479423
ENSMUSG00000032267	Usp28	0.440016	2.91278	3.52434	0.0604738	0.479423
ENSMUSG00000040648	Ppip5k2	-0.484133	5.26705	3.52313	0.0605179	0.479423
ENSMUSG00000056267	Cep70	0.568683	2.24683	3.52094	0.0605981	0.479423
ENSMUSG00000004044	Cavin1	0.578171	2.72669	3.52015	0.0606269	0.479423
ENSMUSG00000000142	Axin2	0.618825	2.05266	3.51876	0.0606779	0.479423
ENSMUSG00000033487	Fndc3a	-0.518714	5.94687	3.51827	0.0606959	0.479423
ENSMUSG00000085962	Gm16984	0.881084	0.582503	3.51782	0.0607122	0.479423
ENSMUSG00000031535	Dkk4	0.958617	-0.325386	3.51621	0.0607714	0.479423
ENSMUSG00000038485	Socs7	-0.413712	3.50265	3.51538	0.0608016	0.479423
ENSMUSG00000031884	Ces2d-ps	-0.564804	3.82277	3.51502	0.060815	0.479423
ENSMUSG00000030079	Ruvbl1	-0.390737	3.7128	3.51159	0.060941	0.479423
ENSMUSG00000031570	Plpp5	-0.583641	4.3747	3.51127	0.0609528	0.479423
ENSMUSG00000029273	Sult1d1	-0.462798	7.21201	3.50917	0.06103	0.479423
ENSMUSG00000032066	Bco2	0.446141	4.02456	3.509	0.0610362	0.479423
ENSMUSG00000097162	2310010J17Rik	0.574231	2.12201	3.5076	0.0610878	0.479423
ENSMUSG00000087177	E130307A14Rik	0.69395	0.111258	3.50604	0.0611455	0.479423
ENSMUSG00000049811	Fam161a	0.595529	1.0549	3.50579	0.0611547	0.479423
ENSMUSG00000028096	Gpr89	-0.384589	4.79865	3.50563	0.0611605	0.479423
ENSMUSG00000019659	Ccdc12	0.456296	4.06803	3.50509	0.0611807	0.479423
ENSMUSG00000026832	Cytip	0.714268	0.0903673	3.50496	0.0611851	0.479423
ENSMUSG00000000823	Zfp512b	0.492225	4.55072	3.50438	0.0612069	0.479423
ENSMUSG00000049904	Tmem17	0.678338	0.232272	3.49893	0.0614083	0.480479
ENSMUSG00000079737	3110001I22Rik	-0.610963	1.07411	3.4987	0.0614168	0.480479
ENSMUSG00000026110	Mgat4a	0.730883	0.10549	3.49583	0.0615237	0.480782
ENSMUSG00000039031	Arhgap18	0.566994	2.85519	3.49563	0.0615308	0.480782
ENSMUSG00000039804	Ncoa5	-0.445409	3.62774	3.49449	0.0615732	0.48082
ENSMUSG00000033102	Cdc14b	0.509977	4.39091	3.49192	0.0616691	0.481275
ENSMUSG00000041375	Ccdc9	0.431936	4.15228	3.49073	0.0617133	0.481326
ENSMUSG00000020982	Nemf	-0.510173	4.537	3.48847	0.0617979	0.481329
ENSMUSG00000024761	Gm16437	-0.591605	0.28937	3.48799	0.0618158	0.481329
ENSMUSG00000023973	Cnpy3	-0.415074	5.13671	3.4877	0.0618265	0.481329
ENSMUSG00000031523	Dlc1	0.44792	4.92141	3.48482	0.061934	0.481731
ENSMUSG00000045733	Sprn	0.896158	0.516916	3.4843	0.0619535	0.481731
ENSMUSG00000028890	Mtf1	-0.416432	3.6524	3.47953	0.0621325	0.482829
ENSMUSG00000108884	Gm45792	-0.738099	1.79058	3.47354	0.0623576	0.484185
ENSMUSG00000034509	Mad2l1bp	-0.673796	2.86223	3.47138	0.0624391	0.484185
ENSMUSG00000026127	Imp4	-0.370496	4.46884	3.47095	0.0624554	0.484185
ENSMUSG00000055612	Cdca7	-0.749937	1.58447	3.47087	0.0624584	0.484185
ENSMUSG00000030545	Pex11a	0.452661	6.56145	3.46553	0.0626603	0.485456
ENSMUSG00000021557	Agtpbp1	-0.428595	3.30243	3.45992	0.0628733	0.486811
ENSMUSG00000031503	Col4a2	-0.438442	3.7698	3.45732	0.0629723	0.487283
ENSMUSG00000011884	Gltp	0.580763	1.86594	3.45438	0.0630845	0.487493
ENSMUSG00000016528	Mapkapk2	-0.385995	5.44319	3.45223	0.0631666	0.487493
ENSMUSG00000025507	Pidd1	-0.593506	1.46112	3.4507	0.0632249	0.487493
ENSMUSG00000012519	Mlkl	0.775464	1.88884	3.4507	0.0632251	0.487493
ENSMUSG00000041891	Lman1	-0.503786	7.8521	3.45065	0.0632269	0.487493
ENSMUSG00000105135	Gm43667	0.650428	1.90112	3.45062	0.0632281	0.487493
ENSMUSG00000031371	Haus7	0.499685	3.65508	3.44482	0.0634505	0.488667
ENSMUSG00000029001	Fbxo44	-1.61486	0.82333	3.44359	0.0634977	0.488667
ENSMUSG00000009995	Taz	0.419015	5.2538	3.44326	0.0635102	0.488667
ENSMUSG00000027339	Rassf2	0.602987	0.71007	3.44266	0.0635333	0.488667
ENSMUSG00000026270	Capn10	-0.407392	4.25372	3.44124	0.0635881	0.488795
ENSMUSG00000028195	Ccn1	0.584898	2.70958	3.43991	0.0636391	0.488893
ENSMUSG00000052331	Ankrd44	0.550986	2.0052	3.4371	0.0637476	0.489113
ENSMUSG00000023232	Serinc2	0.555303	2.5877	3.43625	0.0637803	0.489113
ENSMUSG00000105096	Gbp10	-0.719102	2.13803	3.4362	0.0637824	0.489113
ENSMUSG00000021947	Cryl1	0.638308	4.86385	3.43491	0.0638319	0.4892
ENSMUSG00000017132	Cyth1	0.404718	5.15504	3.43098	0.0639839	0.490071
ENSMUSG00000028233	Tgs1	-0.399129	3.98947	3.42968	0.0640346	0.490166
ENSMUSG00000087445	Gm14286	0.735378	-0.0409867	3.42838	0.064085	0.490258
ENSMUSG00000101493	2810405F17Rik	0.68703	0.200949	3.42301	0.0642935	0.491559
ENSMUSG00000044786	Zfp36	0.624071	6.49253	3.42134	0.0643589	0.491765
ENSMUSG00000022676	Snai2	0.640178	2.00414	3.41991	0.0644145	0.491851
ENSMUSG00000022774	Ncbp2	-0.381105	4.51023	3.41863	0.0644644	0.491851
ENSMUSG00000020263	Appl2	0.387672	4.57446	3.41809	0.0644855	0.491851
ENSMUSG00000020522	Mfap3	-0.482256	3.37402	3.41123	0.064754	0.493506
ENSMUSG00000023068	Nus1	-0.411893	5.69723	3.41058	0.0647796	0.493506
ENSMUSG00000038708	Golga4	-0.469684	5.99082	3.40849	0.0648617	0.493704
ENSMUSG00000015966	Il17rb	0.484152	2.96534	3.40785	0.0648868	0.493704
ENSMUSG00000030059	Tmf1	-0.49155	4.38089	3.40697	0.0649214	0.493704
ENSMUSG00000001630	Stk38l	-0.451763	3.92855	3.4034	0.0650622	0.494117
ENSMUSG00000074247	Dda1	-0.396571	3.86569	3.40297	0.065079	0.494117
ENSMUSG00000049721	Gal3st1	0.906453	-0.469679	3.40223	0.0651083	0.494117
ENSMUSG00000035171	1110059E24Rik	-0.504002	4.60366	3.40159	0.0651337	0.494117
ENSMUSG00000001473	Tubb6	-0.478427	2.94653	3.4007	0.0651689	0.494117
ENSMUSG00000108435	Gm45051	0.854032	1.37372	3.39876	0.0652453	0.494403
ENSMUSG00000047554	Tmem41b	-0.505623	4.58003	3.39514	0.0653887	0.495197
ENSMUSG00000039201	Tbc1d25	-0.608984	1.85436	3.39292	0.0654768	0.49557
ENSMUSG00000050148	Ubqln2	-0.403971	3.46376	3.39163	0.0655281	0.495665
ENSMUSG00000038375	Trp53inp2	-0.58918	7.59249	3.38869	0.0656449	0.496255
ENSMUSG00000040026	Saa3	-1.15927	2.91942	3.38671	0.0657239	0.496559
ENSMUSG00000078853	Igtp	0.56357	5.44745	3.3856	0.0657684	0.496602
ENSMUSG00000038250	Usp38	-0.417558	4.24179	3.38321	0.0658636	0.496764
ENSMUSG00000105881	4932422M17Rik	0.565377	1.45412	3.38311	0.0658676	0.496764
ENSMUSG00000097047	1110020A21Rik	0.577868	0.961425	3.38083	0.0659587	0.496892
ENSMUSG00000023075	Akirin1	-0.408781	4.81464	3.37953	0.0660107	0.496892
ENSMUSG00000051256	Jagn1	-0.375089	4.79998	3.37881	0.0660399	0.496892
ENSMUSG00000055553	Kxd1	0.427335	5.42852	3.37861	0.0660479	0.496892
ENSMUSG00000064307	Lrrc51	-0.691027	0.406521	3.37784	0.0660788	0.496892
ENSMUSG00000026872	Zeb2	0.472454	3.01845	3.37605	0.0661506	0.49714
ENSMUSG00000091811	Inafm1	0.546493	2.44054	3.3729	0.0662769	0.497797
ENSMUSG00000051984	Sec31b	0.749323	3.24685	3.3712	0.0663456	0.49802
ENSMUSG00000024084	Qpct	0.591004	3.60677	3.36967	0.0664072	0.498191
ENSMUSG00000046338	Gpat2	0.733796	1.23632	3.36589	0.0665595	0.49904
ENSMUSG00000021484	Lman2	-0.451871	7.5829	3.36324	0.0666666	0.499256
ENSMUSG00000030243	Recql	-0.577309	1.504	3.361	0.0667575	0.499256
ENSMUSG00000022389	Tef	0.454196	8.0099	3.36036	0.0667836	0.499256
ENSMUSG00000034333	Zbed4	-0.585799	2.23193	3.3592	0.0668307	0.499256
ENSMUSG00000034780	B3galt1	-0.389624	4.82363	3.35919	0.066831	0.499256
ENSMUSG00000027843	Ptpn22	0.810745	-0.447872	3.35845	0.0668608	0.499256
ENSMUSG00000007035	Msh5	0.87109	0.780801	3.35844	0.0668615	0.499256
ENSMUSG00000004565	Pnpla6	-0.464701	5.17577	3.35739	0.0669041	0.499283
ENSMUSG00000058542	Gm15590	0.651414	2.8857	3.35606	0.0669583	0.499395
ENSMUSG00000005225	Plekha8	-0.363967	5.07589	3.35278	0.0670918	0.5001
ENSMUSG00000029439	Sfswap	0.465988	4.5001	3.34909	0.067242	0.500927
ENSMUSG00000041293	Adgrf1	-1.24663	2.62552	3.34712	0.0673228	0.501237
ENSMUSG00000020844	Nxn	0.617757	0.944112	3.34196	0.0675343	0.502198
ENSMUSG00000109587	Gm31105	0.598352	1.13985	3.34011	0.0676101	0.502198
ENSMUSG00000021461	Fancc	0.525022	2.40598	3.3399	0.0676186	0.502198
ENSMUSG00000069094	Pde7a	-0.421297	2.86039	3.33946	0.0676367	0.502198
ENSMUSG00000034245	Hdac11	0.456214	4.95996	3.33918	0.0676481	0.502198
ENSMUSG00000003848	Nob1	-0.493093	3.42006	3.33573	0.0677901	0.502852
ENSMUSG00000054115	Skp2	-0.532955	1.44558	3.33401	0.0678614	0.502852
ENSMUSG00000054580	Pla2r1	0.542833	1.86755	3.3338	0.0678699	0.502852
ENSMUSG00000026315	Serpinb8	0.844676	2.23572	3.33323	0.0678934	0.502852
ENSMUSG00000066232	Ipo7	-0.483188	6.2839	3.33089	0.06799	0.502965
ENSMUSG00000004040	Stat3	-0.402704	6.19866	3.33057	0.0680032	0.502965
ENSMUSG00000108218	Olfr1372-ps1	0.687728	1.03839	3.33	0.0680271	0.502965
ENSMUSG00000020083	Fam241b	0.772023	0.385619	3.32905	0.068066	0.502965
ENSMUSG00000037089	Slc35b2	0.435743	5.23895	3.32499	0.0682344	0.503918
ENSMUSG00000041763	Tpp2	-0.384129	5.24447	3.32399	0.0682761	0.503935
ENSMUSG00000027540	Ptpn1	-0.460581	4.32245	3.32083	0.0684072	0.504408
ENSMUSG00000036613	Eipr1	-0.45322	2.89976	3.32055	0.068419	0.504408
ENSMUSG00000050953	Gja1	0.486695	2.08685	3.316	0.0686084	0.505513
ENSMUSG00000092364	Gm20476	0.616373	0.46809	3.31324	0.0687239	0.505697
ENSMUSG00000047407	Tgif1	0.4859	3.79213	3.31306	0.0687312	0.505697
ENSMUSG00000032245	Cln6	0.630105	1.21904	3.31257	0.068752	0.505697
ENSMUSG00000050545	Fam228b	0.7518	0.225838	3.30807	0.0689405	0.50669
ENSMUSG00000021208	Ifi27l2b	0.850278	1.93847	3.30745	0.0689663	0.50669
ENSMUSG00000021277	Traf3	-0.482527	3.00975	3.30213	0.06919	0.508042
ENSMUSG00000011114	Tbrg1	-0.422734	4.75009	3.30033	0.069266	0.508308
ENSMUSG00000037685	Atp8a1	0.512159	2.65546	3.29778	0.0693738	0.508807
ENSMUSG00000050445	Cyp8b1	0.604034	7.31106	3.29582	0.0694562	0.508888
ENSMUSG00000045409	Trim39	-0.658075	4.46783	3.29563	0.0694644	0.508888
ENSMUSG00000044254	Pcsk9	0.481137	6.15114	3.29316	0.0695688	0.509347
ENSMUSG00000027111	Itga6	-0.555049	1.32517	3.29135	0.0696456	0.509347
ENSMUSG00000021326	Trim27	-0.438261	4.32756	3.29133	0.0696465	0.509347
ENSMUSG00000072694	1500011B03Rik	-0.856841	-0.258529	3.2843	0.0699455	0.511242
ENSMUSG00000090086	AI480526	0.523518	3.85763	3.28012	0.0701237	0.512016
ENSMUSG00000032109	Nlrx1	0.478348	2.51667	3.27994	0.0701315	0.512016
ENSMUSG00000035936	Aldh5a1	0.403695	5.6309	3.27837	0.0701985	0.512191
ENSMUSG00000019461	Plscr3	0.477742	3.10498	3.27662	0.0702735	0.512191
ENSMUSG00000021306	Gpr137b	0.55851	0.585335	3.27585	0.0703065	0.512191
ENSMUSG00000022941	Ripply3	0.619335	0.56515	3.27564	0.0703156	0.512191
ENSMUSG00000109812	Gm45640	0.827161	0.0871803	3.27344	0.0704098	0.512377
ENSMUSG00000033159	Cnppd1	0.53916	5.77514	3.27317	0.0704212	0.512377
ENSMUSG00000041263	Rusc1	-0.676376	1.82463	3.27083	0.0705221	0.51251
ENSMUSG00000015396	Cd83	0.699221	0.545316	3.2705	0.070536	0.51251
ENSMUSG00000027180	Fbxo3	0.466216	6.69987	3.26995	0.0705598	0.51251
ENSMUSG00000029780	Nt5c3	0.402798	4.3567	3.26778	0.0706532	0.512898
ENSMUSG00000097639	Platr4	0.668548	-0.0136327	3.26679	0.0706958	0.512916
ENSMUSG00000041741	Pde3a	-0.606645	0.742854	3.26566	0.0707444	0.512977
ENSMUSG00000034024	Cct2	-0.362839	6.72981	3.26377	0.0708262	0.513023
ENSMUSG00000015568	Lpl	-0.845474	2.74424	3.26277	0.0708694	0.513023
ENSMUSG00000047242	Taf9b	0.643653	0.179516	3.26187	0.0709081	0.513023
ENSMUSG00000033594	Spata2l	0.610767	4.49385	3.2618	0.0709111	0.513023
ENSMUSG00000036980	Taf6	-0.571268	2.56726	3.26075	0.0709565	0.513061
ENSMUSG00000037262	Kin	0.454425	3.86276	3.25625	0.0711515	0.513476
ENSMUSG00000003477	Inmt	0.51147	9.8158	3.25625	0.0711516	0.513476
ENSMUSG00000024081	Cebpz	-0.383452	4.95296	3.25602	0.0711618	0.513476
ENSMUSG00000072596	Ear2	-0.68675	1.07431	3.25553	0.0711831	0.513476
ENSMUSG00000054435	Gimap4	0.411785	3.3605	3.2548	0.0712147	0.513476
ENSMUSG00000068299	Nat8f4	0.400252	4.26143	3.25179	0.0713453	0.514128
ENSMUSG00000024427	Spry4	0.710775	3.28567	3.25064	0.0713957	0.514166
ENSMUSG00000049516	Spty2d1	-0.521772	3.97307	3.24983	0.0714309	0.514166
ENSMUSG00000041992	Rapgef5	0.667206	1.44516	3.24591	0.071602	0.514911
ENSMUSG00000061894	Zscan20	-0.5469	1.14919	3.24561	0.071615	0.514911
ENSMUSG00000030004	Nat8	0.665973	4.3406	3.2431	0.0717249	0.515412
ENSMUSG00000041126	H2az2	0.434879	4.84675	3.24161	0.0717902	0.515591
ENSMUSG00000032475	Nck1	-0.505241	4.01322	3.24042	0.0718422	0.515675
ENSMUSG00000000826	Dnajc5	-0.352033	5.81209	3.23682	0.0720003	0.516273
ENSMUSG00000017057	Il13ra1	-0.456845	5.24176	3.23668	0.0720062	0.516273
ENSMUSG00000028884	Rpa2	-0.597264	2.65701	3.23562	0.0720531	0.51632
ENSMUSG00000020472	Zkscan17	0.551131	3.82185	3.23074	0.072268	0.51676
ENSMUSG00000053819	Camk2d	0.448547	2.6531	3.23041	0.0722824	0.51676
ENSMUSG00000037922	Bank1	0.702454	0.581941	3.22986	0.0723067	0.51676
ENSMUSG00000032788	Pdxk	-0.430116	6.11964	3.22922	0.072335	0.51676
ENSMUSG00000062382	Ftl1-ps1	0.591917	6.595	3.22908	0.0723413	0.51676
ENSMUSG00000079316	Rab9	0.368702	5.57594	3.22873	0.0723569	0.51676
ENSMUSG00000025558	Dock9	0.429319	3.94872	3.2257	0.0724908	0.517403
ENSMUSG00000024070	Prkd3	0.584957	7.25107	3.22438	0.0725493	0.517403
ENSMUSG00000041939	Mvk	0.529027	4.00745	3.22395	0.0725683	0.517403
ENSMUSG00000041354	Rgl2	0.441357	4.26003	3.22301	0.0726099	0.517411
ENSMUSG00000027276	Jag1	-0.554913	2.01461	3.22147	0.0726782	0.51761
ENSMUSG00000043192	Gm1840	-0.525198	1.58794	3.21724	0.0728665	0.518008
ENSMUSG00000016087	Fli1	0.586437	1.12355	3.21506	0.0729637	0.518008
ENSMUSG00000042524	Sun2	0.496072	5.86594	3.21501	0.0729658	0.518008
ENSMUSG00000024962	Vegfb	0.559149	3.25733	3.2134	0.0730376	0.518008
ENSMUSG00000019856	Fam184a	-0.994866	0.165817	3.21298	0.0730562	0.518008
ENSMUSG00000033417	Cacul1	-0.40117	5.87387	3.21215	0.0730932	0.518008
ENSMUSG00000090610	Gm3571	0.845677	2.4616	3.21019	0.0731811	0.518008
ENSMUSG00000028807	Zbtb8a	-0.642523	1.19565	3.20932	0.0732199	0.518008
ENSMUSG00000031060	Rbm10	-0.401418	4.92823	3.20924	0.0732237	0.518008
ENSMUSG00000028517	Plpp3	0.467116	6.62531	3.20889	0.0732391	0.518008
ENSMUSG00000054079	Utp18	-0.367355	3.69144	3.20866	0.0732497	0.518008
ENSMUSG00000022360	Atad2	-0.705096	2.35469	3.20857	0.0732534	0.518008
ENSMUSG00000016831	Tox4	-0.375364	4.64379	3.20837	0.0732626	0.518008
ENSMUSG00000020346	Mgat1	-0.361824	5.84996	3.20751	0.0733011	0.518008
ENSMUSG00000078566	Bnip3	0.421476	7.21268	3.20652	0.0733453	0.518034
ENSMUSG00000061360	Phf5a	-0.370756	4.89632	3.20561	0.0733862	0.518037
ENSMUSG00000041836	Ptpre	0.705406	0.401867	3.20232	0.0735338	0.51862
ENSMUSG00000037270	4932438A13Rik	-0.42951	5.31485	3.20196	0.0735499	0.51862
ENSMUSG00000004609	Cd33	0.664207	0.0275181	3.19611	0.0738135	0.519528
ENSMUSG00000026209	Dnpep	-0.400441	5.58945	3.19577	0.0738291	0.519528
ENSMUSG00000022323	Rida	0.438387	9.77684	3.19557	0.0738381	0.519528
ENSMUSG00000021804	Rgr	0.923429	-0.225664	3.19523	0.0738535	0.519528
ENSMUSG00000003464	Pex19	0.477698	6.78874	3.1946	0.0738818	0.519528
ENSMUSG00000071551	Akr1c19	0.665571	6.71855	3.19223	0.0739891	0.519997
ENSMUSG00000085445	Gm16348	-0.988049	2.6012	3.19012	0.0740845	0.520381
ENSMUSG00000031684	Slc10a7	-0.468439	2.72665	3.18837	0.0741641	0.520655
ENSMUSG00000070576	Mn1	0.563132	2.90997	3.18733	0.0742113	0.5207
ENSMUSG00000037548	H2-DMb2	0.829096	-0.473362	3.18642	0.0742522	0.520702
ENSMUSG00000025188	Hps1	0.520986	2.24623	3.18367	0.0743777	0.521033
ENSMUSG00000034501	Pcnx4	0.491827	2.43272	3.18359	0.0743809	0.521033
ENSMUSG00000039824	Myl6b	0.654994	0.0148425	3.1818	0.0744627	0.521048
ENSMUSG00000090952	Gm17251	0.701067	1.35104	3.1799	0.0745491	0.521048
ENSMUSG00000090019	Gimap1	0.549153	1.29726	3.17953	0.0745664	0.521048
ENSMUSG00000100075	1700018L02Rik	-1.42674	2.69615	3.17926	0.0745783	0.521048
ENSMUSG00000026434	Nucks1	-0.37288	6.25756	3.17908	0.0745867	0.521048
ENSMUSG00000048668	Rhno1	0.558518	2.65821	3.17386	0.0748252	0.522429
ENSMUSG00000035245	Eogt	-0.539116	2.76167	3.1728	0.0748738	0.522483
ENSMUSG00000026853	Crat	0.483485	4.81964	3.16637	0.0751694	0.52388
ENSMUSG00000027510	Rbm38	-0.55519	0.800996	3.1659	0.075191	0.52388
ENSMUSG00000032096	Arcn1	-0.450203	6.99473	3.16448	0.0752563	0.52388
ENSMUSG00000027014	Cwc22	-2.13409	5.12375	3.16444	0.0752584	0.52388
ENSMUSG00000025779	Ly96	-0.601934	1.63861	3.16362	0.0752962	0.52388
ENSMUSG00000021036	Sptlc2	-0.376739	4.18353	3.1631	0.0753198	0.52388
ENSMUSG00000049404	Rarres1	-0.511763	5.49723	3.16066	0.0754325	0.524379
ENSMUSG00000026526	Fh1	-0.546669	7.75612	3.15837	0.0755384	0.52483
ENSMUSG00000027575	Arfgap1	-0.38894	4.71728	3.15508	0.0756912	0.525235
ENSMUSG00000022200	Golph3	-0.36812	5.75091	3.15464	0.0757115	0.525235
ENSMUSG00000029490	Mfsd7a	0.527118	1.91427	3.15274	0.0757997	0.525235
ENSMUSG00000057363	Uxs1	-0.464221	3.24952	3.15259	0.0758064	0.525235
ENSMUSG00000000486	2020-09-01	0.660263	0.687257	3.15211	0.0758288	0.525235
ENSMUSG00000036745	Ttll7	0.615035	0.122937	3.1518	0.0758432	0.525235
ENSMUSG00000063077	Kif1b	0.512863	6.79299	3.14932	0.0759587	0.525735
ENSMUSG00000026471	Mr1	0.589152	2.56277	3.14849	0.0759975	0.525735
ENSMUSG00000006127	Inpp5k	0.425081	4.19773	3.14139	0.0763289	0.527428
ENSMUSG00000083282	Ctsf	-0.543238	4.57158	3.14046	0.0763721	0.527428
ENSMUSG00000028411	Aptx	0.401248	3.28111	3.13982	0.0764021	0.527428
ENSMUSG00000019970	Sgk1	0.466029	3.9271	3.13971	0.0764072	0.527428
ENSMUSG00000028059	Arhgef2	0.511007	1.91243	3.13852	0.0764633	0.527531
ENSMUSG00000044629	Cnrip1	0.690718	0.36331	3.13676	0.0765458	0.527815
ENSMUSG00000034917	Tjp3	-0.659508	2.81455	3.13237	0.0767522	0.528953
ENSMUSG00000108709	4933431G14Rik	0.874974	1.17477	3.13146	0.0767947	0.528962
ENSMUSG00000039835	Nhsl1	-0.754522	2.85466	3.13041	0.0768445	0.529019
ENSMUSG00000019088	Dnase1l1	0.447948	2.44788	3.1295	0.0768875	0.52903
ENSMUSG00000011257	Pabpc4	-0.372543	5.07967	3.12673	0.0770181	0.529187
ENSMUSG00000040732	Erg	0.498817	1.86038	3.12626	0.0770401	0.529187
ENSMUSG00000080316	Spaca6	0.720295	1.60086	3.12561	0.0770712	0.529187
ENSMUSG00000034111	Tmed8	-0.488137	2.51549	3.12517	0.077092	0.529187
ENSMUSG00000038302	Afg1l	-0.453541	3.38501	3.12433	0.0771318	0.529187
ENSMUSG00000085566	A730017L22Rik	0.439687	2.94765	3.12369	0.077162	0.529187
ENSMUSG00000020319	Wdpcp	0.594665	0.876742	3.12289	0.0771998	0.529187
ENSMUSG00000093606	B130034C11Rik	0.623896	0.0308123	3.11957	0.0773574	0.529801
ENSMUSG00000038848	Ythdf1	-0.385686	5.03499	3.11925	0.0773723	0.529801
ENSMUSG00000053303	Slc22a26	1.95541	5.85192	3.11594	0.0775296	0.530594
ENSMUSG00000028572	Hook1	-0.491351	5.86351	3.11325	0.077658	0.530927
ENSMUSG00000030917	Tmem159	0.602085	1.0614	3.11318	0.0776611	0.530927
ENSMUSG00000039178	Tbc1d19	0.603622	1.52725	3.11137	0.0777477	0.531235
ENSMUSG00000035778	Ggta1	0.521339	1.25499	3.10954	0.077835	0.531244
ENSMUSG00000029563	Foxp2	0.839337	1.73687	3.10911	0.0778553	0.531244
ENSMUSG00000000903	Vpreb3	1.18352	0.00264182	3.10748	0.0779333	0.531244
ENSMUSG00000099568	Gm28513	1.33655	-0.780054	3.10602	0.0780032	0.531244
ENSMUSG00000034220	Gpc1	0.72929	2.03985	3.1046	0.0780712	0.531244
ENSMUSG00000016493	Cd46	0.538069	0.78	3.10448	0.0780773	0.531244
ENSMUSG00000022031	Elp3	-0.430256	4.38932	3.10336	0.0781307	0.531244
ENSMUSG00000057886	Cbx3-ps6	-0.662477	0.244693	3.10263	0.0781661	0.531244
ENSMUSG00000002625	Akap8l	0.590136	5.11911	3.10226	0.0781837	0.531244
ENSMUSG00000009894	Snap47	-0.355888	6.13403	3.1019	0.0782011	0.531244
ENSMUSG00000070461	9230112E08Rik	-0.613747	1.96918	3.10158	0.0782165	0.531244
ENSMUSG00000036955	Kif1bp	-0.376683	3.56843	3.10025	0.0782802	0.531244
ENSMUSG00000061099	Gapdhs	0.563662	1.25432	3.10007	0.078289	0.531244
ENSMUSG00000004952	Rasa4	0.781828	1.15351	3.0978	0.0783984	0.531704
ENSMUSG00000061046	Haghl	0.601084	1.72506	3.09458	0.0785534	0.532473
ENSMUSG00000025743	Sdc3	0.373016	4.97846	3.09253	0.0786527	0.532832
ENSMUSG00000033149	Phldb2	0.386142	5.2814	3.09176	0.0786897	0.532832
ENSMUSG00000032020	Ubash3b	0.56337	0.498429	3.09089	0.0787316	0.532834
ENSMUSG00000026399	Cd55	0.383831	3.77853	3.08995	0.0787773	0.532861
ENSMUSG00000031617	Tmem184c	-0.468484	3.65522	3.08504	0.0790154	0.534189
ENSMUSG00000026623	Lpgat1	-0.434066	7.41963	3.08301	0.0791142	0.534366
ENSMUSG00000025500	Lmntd2	0.594766	0.997995	3.08165	0.0791803	0.534366
ENSMUSG00000056666	Retsat	0.510943	7.64496	3.08108	0.0792081	0.534366
ENSMUSG00000028032	Papss1	-0.858905	2.63468	3.08106	0.0792087	0.534366
ENSMUSG00000024143	Rhoq	0.454377	3.08018	3.07896	0.0793113	0.534563
ENSMUSG00000080002	Gm5566	-0.616944	0.574755	3.07851	0.0793333	0.534563
ENSMUSG00000063524	Eno1	-0.632599	8.5656	3.07789	0.0793632	0.534563
ENSMUSG00000029804	Herc3	0.476024	2.21727	3.07504	0.0795028	0.535026
ENSMUSG00000110397	Gm45540	0.749575	0.336826	3.07477	0.0795156	0.535026
ENSMUSG00000022179	4931414P19Rik	-0.566681	1.59191	3.06761	0.0798668	0.537106
ENSMUSG00000053950	Adnp2	-0.430046	2.59464	3.06587	0.0799523	0.537238
ENSMUSG00000108238	Gm43984	0.598523	0.119991	3.06473	0.0800085	0.537238
ENSMUSG00000019312	Grb7	0.406282	6.57616	3.06465	0.0800124	0.537238
ENSMUSG00000038119	Cdon	-0.604652	0.142082	3.06297	0.0800952	0.537512
ENSMUSG00000024679	Ms4a6d	-0.656124	0.78717	3.06043	0.0802203	0.53785
ENSMUSG00000027746	Ufm1	-0.365316	5.57978	3.06024	0.0802297	0.53785
ENSMUSG00000033917	Gde1	-0.412353	5.81617	3.05775	0.0803527	0.537962
ENSMUSG00000048429	Timm29	-0.361085	5.20753	3.05691	0.0803946	0.537962
ENSMUSG00000040560	Wdr7	-0.383566	4.17901	3.05653	0.0804134	0.537962
ENSMUSG00000026648	Dclre1c	0.542054	2.77841	3.0565	0.0804146	0.537962
ENSMUSG00000037621	Atoh8	1.00581	3.94027	3.0532	0.0805781	0.538774
ENSMUSG00000030707	Coro1a	0.503251	2.50657	3.05062	0.0807061	0.539348
ENSMUSG00000036181	H1f2	-0.486671	5.07778	3.04928	0.0807731	0.539514
ENSMUSG00000026712	Mrc1	0.428662	5.1507	3.04796	0.0808385	0.539669
ENSMUSG00000036285	Noa1	-0.399309	3.15771	3.0433	0.0810709	0.540808
ENSMUSG00000063659	Zbtb18	-0.346567	4.53021	3.04284	0.0810938	0.540808
ENSMUSG00000048832	Vps37c	-0.482369	3.44477	3.04116	0.0811778	0.541015
ENSMUSG00000074093	Svip	0.449705	3.9467	3.04053	0.0812094	0.541015
ENSMUSG00000036002	Fam214b	-0.502864	3.90615	3.03816	0.0813281	0.541524
ENSMUSG00000027739	Rab33b	-0.48918	2.884	3.03498	0.0814873	0.542158
ENSMUSG00000006732	Mettl1	-0.446465	3.2989	3.03457	0.081508	0.542158
ENSMUSG00000048406	B330016D10Rik	0.72664	0.884813	3.03187	0.0816438	0.542675
ENSMUSG00000031616	Ednra	0.556348	1.90363	3.03134	0.0816707	0.542675
ENSMUSG00000027646	Src	-0.653763	0.904041	3.0273	0.081874	0.543436
ENSMUSG00000061024	Rrs1	-0.45848	3.99841	3.02703	0.0818878	0.543436
ENSMUSG00000037808	Fam76b	0.393741	3.47309	3.02654	0.0819126	0.543436
ENSMUSG00000058809	Hspd1-ps3	-0.438513	3.80415	3.02484	0.0819983	0.543722
ENSMUSG00000028822	Tmem50a	0.379232	6.57329	3.02086	0.0821998	0.544569
ENSMUSG00000040446	Rprd1a	-0.375872	3.98577	3.02064	0.0822112	0.544569
ENSMUSG00000036748	Cuedc2	0.406025	3.7193	3.01787	0.0823514	0.544829
ENSMUSG00000050471	Fam118b	-0.425592	2.90964	3.01757	0.0823668	0.544829
ENSMUSG00000073633	Fbxo36	-0.42354	2.44785	3.01735	0.0823782	0.544829
ENSMUSG00000032041	Tirap	-0.418816	4.18985	3.0159	0.0824516	0.545004
ENSMUSG00000073421	H2-Ab1	0.491028	4.52886	3.01479	0.082508	0.545004
ENSMUSG00000027435	Cd93	0.452641	2.226	3.0121	0.082645	0.545004
ENSMUSG00000060807	Serpina6	0.633888	8.9187	3.00967	0.082769	0.545004
ENSMUSG00000025574	Tk1	0.577255	5.8375	3.00962	0.0827719	0.545004
ENSMUSG00000001380	Hars	-0.353383	4.82114	3.0093	0.0827881	0.545004
ENSMUSG00000073542	Cep76	-0.428405	2.25577	3.00891	0.0828081	0.545004
ENSMUSG00000022833	Ccdc14	0.668786	0.143504	3.00879	0.0828139	0.545004
ENSMUSG00000037007	Zfp113	0.417839	3.09301	3.00844	0.0828321	0.545004
ENSMUSG00000030834	Abcc6	0.468888	7.60738	3.00813	0.0828479	0.545004
ENSMUSG00000062075	Lmnb2	-0.591028	3.36696	3.00763	0.0828733	0.545004
ENSMUSG00000024654	Asrgl1	0.45303	3.95779	3.00207	0.083158	0.546595
ENSMUSG00000070643	Sox13	-0.423105	2.76862	2.99893	0.0833195	0.547375
ENSMUSG00000032249	Anp32a	0.418104	6.16908	2.9976	0.083388	0.547417
ENSMUSG00000090523	Gypc	0.491873	3.38315	2.99714	0.0834115	0.547417
ENSMUSG00000007379	Dennd2c	0.774988	-0.0979623	2.99604	0.0834686	0.547511
ENSMUSG00000037860	Aim2	0.634209	0.160483	2.99496	0.083524	0.547594
ENSMUSG00000063849	Ppcdc	0.432218	4.43943	2.99284	0.0836333	0.547787
ENSMUSG00000000058	Cav2	0.544759	1.70743	2.99273	0.0836391	0.547787
ENSMUSG00000019810	Fuca2	0.436016	2.53718	2.99166	0.0836943	0.547868
ENSMUSG00000025316	Banp	-0.494413	3.63434	2.99023	0.0837683	0.548072
ENSMUSG00000041264	Uspl1	-0.435691	4.60262	2.98812	0.0838775	0.548143
ENSMUSG00000040613	Apobec1	-0.546519	4.01935	2.98729	0.0839204	0.548143
ENSMUSG00000030247	Kcnj8	0.45616	1.89545	2.98707	0.0839321	0.548143
ENSMUSG00000038174	Fam126b	-0.782275	4.55484	2.98671	0.0839507	0.548143
ENSMUSG00000005980	Dnase1	0.60927	0.109288	2.98395	0.0840939	0.548799
ENSMUSG00000020464	Pnpt1	-0.372253	4.4053	2.98298	0.0841444	0.548848
ENSMUSG00000033065	Pfkm	0.416705	3.92181	2.98174	0.0842086	0.548987
ENSMUSG00000035329	Fbxo33	-0.397167	4.02471	2.97856	0.0843744	0.549089
ENSMUSG00000089781	Gm15756	0.79059	0.634057	2.97813	0.0843965	0.549089
ENSMUSG00000019841	Rev3l	-0.410902	3.98466	2.97759	0.0844249	0.549089
ENSMUSG00000047036	Zfp445	0.395146	6.73463	2.97681	0.0844656	0.549089
ENSMUSG00000079043	Fastkd5	-0.46625	2.96643	2.97664	0.0844746	0.549089
ENSMUSG00000032485	Scap	0.339067	6.23788	2.9765	0.0844819	0.549089
ENSMUSG00000031072	LTO1	-0.354174	3.88908	2.97323	0.0846527	0.549747
ENSMUSG00000037710	Cisd1	0.449586	7.12362	2.97292	0.0846691	0.549747
ENSMUSG00000045314	Sowahb	-0.572304	1.93331	2.96952	0.0848468	0.54989
ENSMUSG00000036368	Rmdn2	0.571339	5.33923	2.96888	0.0848805	0.54989
ENSMUSG00000031387	Renbp	0.674219	1.53042	2.96828	0.0849121	0.54989
ENSMUSG00000029032	Arhgef16	-0.663497	1.60078	2.9665	0.0850055	0.54989
ENSMUSG00000033373	Fntb	-0.535512	1.45872	2.96598	0.0850331	0.54989
ENSMUSG00000003435	Supt5	-0.354269	5.35568	2.96596	0.0850337	0.54989
ENSMUSG00000022304	Dpys	0.486321	7.79173	2.96513	0.0850776	0.54989
ENSMUSG00000020455	Trim11	0.457967	4.94526	2.96502	0.0850835	0.54989
ENSMUSG00000021916	Glt8d1	-0.494723	3.3121	2.96445	0.0851136	0.54989
ENSMUSG00000072872	Rybp	-0.575829	1.98582	2.96406	0.0851337	0.54989
ENSMUSG00000006362	Cbfa2t3	0.59676	1.16419	2.96349	0.0851639	0.54989
ENSMUSG00000025207	Sema4g	0.449034	8.56128	2.96142	0.0852729	0.550162
ENSMUSG00000036966	Spryd3	-0.435721	3.74639	2.96078	0.085307	0.550162
ENSMUSG00000005973	Rcn1	0.39711	3.09956	2.95968	0.0853649	0.550162
ENSMUSG00000028999	Rint1	-0.362624	3.96227	2.95943	0.0853781	0.550162
ENSMUSG00000006740	Kif5b	-0.421087	4.98645	2.95645	0.0855355	0.550899
ENSMUSG00000109274	Gm45133	-0.582264	1.0121	2.95272	0.0857332	0.55161
ENSMUSG00000002900	Lamb1	0.4329	2.48109	2.95095	0.0858271	0.55161
ENSMUSG00000020260	Pofut2	-0.390166	3.72902	2.94994	0.0858809	0.55161
ENSMUSG00000033701	Acbd6	0.443003	4.32808	2.94937	0.085911	0.55161
ENSMUSG00000078771	Evi2a	0.840567	0.655516	2.94912	0.0859243	0.55161
ENSMUSG00000030105	Arl8b	-0.392511	5.75997	2.94898	0.0859315	0.55161
ENSMUSG00000101586	Gm29017	-0.857458	0.60957	2.94868	0.0859479	0.55161
ENSMUSG00000007827	Ankrd26	-0.537536	2.60583	2.94634	0.0860725	0.551866
ENSMUSG00000035493	Tgfbi	0.340445	5.22096	2.94551	0.0861164	0.551866
ENSMUSG00000021366	Hivep1	-0.541344	3.45181	2.9455	0.0861171	0.551866
ENSMUSG00000030219	Erp27	0.809924	1.09003	2.94346	0.0862257	0.552054
ENSMUSG00000003531	Dgcr6	0.346103	5.30405	2.9425	0.0862773	0.552054
ENSMUSG00000022246	Rai14	-0.387713	4.47699	2.94181	0.086314	0.552054
[truncated: 10,792 more rows]
